# Supplementary material for: Copper-catalyzed synthesis of 2-aminopyridylbenzoxazolesviadomino reactions of intermolecularN-arylation and intramolecularO-arylation
Source: Royal Society of Chemistry journal article supplement (doi:10.1039/c9ra01908a), 2019-01-01

## Supporting Information

### Copper-catalyzed synthesis of 2-aminopyridylbenzoxazoles *via* domino reactions of intermolecular *N*-arylation and intramolecular *O*-arylation

Ju-You Lu <sup>\*a</sup>

<sup>a</sup>Laboratory of Green Catalysis and Reaction Engineering of Haikou, Hainan Provincial Fine Chemical Engineering Research Center, School of Chemical Engineering and Technology, Hainan University, Haikou 570228, China. E-mail: [lujy@hainanu.edu.cn](mailto:lujy@hainanu.edu.cn)

### Table of Contents

|                               |    |
|-------------------------------|----|
| 1. General Procedures .....   | 1  |
| 2. Experimental Section ..... | 1  |
| 3. References .....           | 12 |
| 4. NMR Spectra .....          | 13 |

## 1. General Procedures

All reactions were carried out under a nitrogen atmosphere using oven dried glassware and standard Schlenk techniques. All organic solvents were freshly dried and distilled over sodium.  $^1\text{H}$  NMR spectra at 300 MHz, and  $^{13}\text{C}$  NMR spectra at 75 MHz or 150 MHz were obtained on JEOL-ECA300 or ECA600 spectrometers.  $^1\text{H}$  NMR and  $^{13}\text{C}$  NMR were recorded using tetramethylsilane (TMS) in the solvent of  $\text{CDCl}_3$  as the internal standard ( $^1\text{H}$  NMR: TMS at 0.00 ppm,  $\text{CDCl}_3$  at 7.26 ppm.  $^{13}\text{C}$  NMR:  $\text{CDCl}_3$  at 77.0 ppm). Mass spectra were recorded on a ThermoFisher Q Exactive GC spectrometer.

## 2. Experimental Section

### Optimization of the domino reaction conditions

**Table S1.** Optimization of conditions<sup>a</sup>

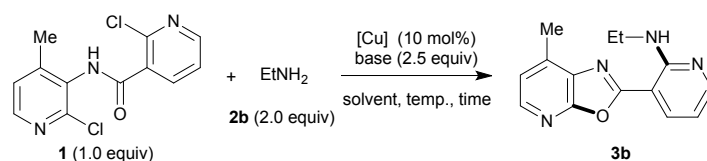

| Entry | Cat.                 | Base                               | Solvent     | Temperature [°C] | Time [h]  | Yield [%] <sup>[a, b]</sup> |
|-------|----------------------|------------------------------------|-------------|------------------|-----------|-----------------------------|
| 1     | Cu                   | K <sub>2</sub> CO <sub>3</sub>     | DMSO        | 80               | 16        | 40                          |
| 2     | CuCl                 | K <sub>2</sub> CO <sub>3</sub>     | DMSO        | 80               | 16        | 72                          |
| 3     | CuBr                 | K <sub>2</sub> CO <sub>3</sub>     | DMSO        | 80               | 16        | 75                          |
| 4     | <b>CuI</b>           | <b>K<sub>2</sub>CO<sub>3</sub></b> | <b>DMSO</b> | <b>80</b>        | <b>16</b> | <b>82</b>                   |
| 5     | Cu <sub>2</sub> O    | K <sub>2</sub> CO <sub>3</sub>     | DMSO        | 80               | 16        | 65 <sup>[c]</sup>           |
| 6     | CuCl <sub>2</sub>    | K <sub>2</sub> CO <sub>3</sub>     | DMSO        | 80               | 16        | 63                          |
| 7     | CuO                  | K <sub>2</sub> CO <sub>3</sub>     | DMSO        | 80               | 16        | 60                          |
| 8     | CuSO <sub>4</sub>    | K <sub>2</sub> CO <sub>3</sub>     | DMSO        | 80               | 16        | 54                          |
| 9     | Cu(OAc) <sub>2</sub> | K <sub>2</sub> CO <sub>3</sub>     | DMSO        | 80               | 16        | 65                          |
| 10    | -                    | K <sub>2</sub> CO <sub>3</sub>     | DMSO        | 80               | 16        | 0 <sup>[d]</sup>            |
| 11    | CuI                  | Na <sub>2</sub> CO <sub>3</sub>    | DMSO        | 80               | 16        | 54                          |
| 12    | CuI                  | CS <sub>2</sub> CO <sub>3</sub>    | DMSO        | 80               | 16        | 38                          |
| 13    | CuI                  | K <sub>3</sub> PO <sub>4</sub>     | DMSO        | 80               | 16        | 46                          |
| 14    | CuI                  | K <sub>2</sub> CO <sub>3</sub>     | DMSO        | 60               | 16        | 68                          |
| 15    | CuI                  | K <sub>2</sub> CO <sub>3</sub>     | DMSO        | 70               | 16        | 74                          |
| 16    | CuI                  | K <sub>2</sub> CO <sub>3</sub>     | DMSO        | 90               | 16        | 80                          |
| 17    | CuI                  | K <sub>2</sub> CO <sub>3</sub>     | DMSO        | 100              | 16        | 78                          |
| 18    | CuI                  | K <sub>2</sub> CO <sub>3</sub>     | DMF         | 80               | 16        | 35                          |
| 19    | CuI                  | K <sub>2</sub> CO <sub>3</sub>     | DMA         | 80               | 16        | 30                          |
| 20    | CuI                  | K <sub>2</sub> CO <sub>3</sub>     | 1,4-Dioxane | 80               | 16        | 44                          |
| 21    | CuI                  | K <sub>2</sub> CO <sub>3</sub>     | DMSO        | 80               | 12        | 65                          |
| 22    | CuI                  | K <sub>2</sub> CO <sub>3</sub>     | DMSO        | 80               | 14        | 74                          |
| 23    | CuI                  | K <sub>2</sub> CO <sub>3</sub>     | DMSO        | 80               | 18        | 82                          |
| 24    | CuI                  | K <sub>2</sub> CO <sub>3</sub>     | DMSO        | 80               | 20        | 83                          |

<sup>a</sup> Reaction condition: **1** (0.5 mmol), **2b** (1 mmol), catalyst (0.05 mmol), base (1.25 mmol), solvent (2 mL) in a Schlenk tube under nitrogen atmosphere. <sup>b</sup> Isolated yield. <sup>c</sup> Cu<sub>2</sub>O (0.025 mmol). <sup>d</sup> In the absence of catalyst. DMSO = dimethyl sulfoxide, DMF = N,N-Dimethylformamide, DMA = N,N-

Dimethylacetamide.

**General procedure for synthesis of 2-aminopyridylbenzoxazoles:** A 10 mL Schlenk tube equipped with a magnetic stirring bar was charged with CuI (0.05 mmol), K<sub>2</sub>CO<sub>3</sub> (1.25 mmol for free amine or 1.75 mmol for amine hydrogen chloride), and 2-halo-*N*-(2-haloaryl)nicotinamides (0.5 mmol). The tube was evacuated twice and back-filled with nitrogen. Amine (1 mmol) and DMSO (2 mL) were added to the tube at room temperature under a stream of nitrogen, and the tube was sealed and put into a pre-heated oil bath at 80 °C for 16 h under a positive pressure of nitrogen. After the resulting solution was cooled to room temperature, the solvent was concentrated, and the residue was purified by column chromatography on silica gel to provide the desired product.

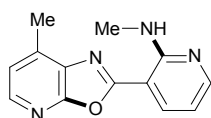

**3a:** Yield 78%. Colorless crystal, mp 151-153 °C.

<sup>1</sup>H NMR (CDCl<sub>3</sub>, 300 MHz, ppm) δ 8.20 (s, br, 1H), 8.14-8.12 (m, 1H), 8.06-8.02 (m, 1H), 7.98-7.95 (m, 1H), 6.89 (t, 1H, *J* = 5.5 Hz), 6.49-6.43 (m, 1H), 3.02 (t, 3H, *J* = 4.8 Hz), 2.43 (d, 3H, *J* = 6.2 Hz).

<sup>13</sup>C NMR (CDCl<sub>3</sub>, 75 MHz, ppm) δ 160.8, 158.2, 156.8, 152.0, 143.8, 139.5, 136.9, 132.4, 121.9, 111.1, 103.4, 28.1, 16.2.

HRMS: *m/z* calcd for C<sub>13</sub>H<sub>12</sub>N<sub>4</sub>O [M]<sup>+</sup>: 240.1011. Found: 240.1013.

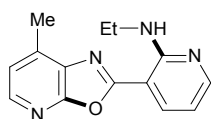

**3b:** Yield 82%. Colorless crystal, mp 147-148 °C.

<sup>1</sup>H NMR (CDCl<sub>3</sub>, 300 MHz, ppm) δ 8.32 (t, 1H, *J* = 5.1 Hz), 8.12 (dd, 1H, *J* = 11.3 Hz, *J* = 2.0 Hz), 8.10 (dd, 1H, *J* = 14.4 Hz, *J* = 1.7 Hz), 7.99 (d, 1H, *J* = 5.1 Hz), 6.93 (d, 1H, *J* = 5.1 Hz), 6.48 (dd, 1H, *J* = 7.5 Hz, *J* = 4.8 Hz), 3.55-3.46 (m, 2H), 2.45 (s, 3H), 1.25 (t, 3H, *J* = 7.2 Hz).

<sup>13</sup>C NMR (CDCl<sub>3</sub>, 75 MHz, ppm) δ 160.9, 158.3, 156.3, 152.1, 143.8, 139.5, 137.0, 132.5, 121.9, 111.1, 103.2, 36.0, 16.1, 14.8.

HRMS: *m/z* calcd for C<sub>14</sub>H<sub>14</sub>N<sub>4</sub>O [M]<sup>+</sup>: 254.1168. Found: 254.1165.

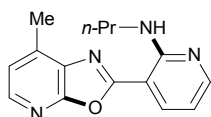

**3c:** Yield 80%. Colorless crystal, mp 140-141 °C.

<sup>1</sup>H NMR (CDCl<sub>3</sub>, 300 MHz, ppm) δ 8.52 (t, 1H, *J* = 5.1 Hz), 8.19 (dd, 1H, *J* = 8.0 Hz, *J* = 1.7 Hz), 8.17 (dd, 1H, *J* = 11.6 Hz, *J* = 2.0 Hz), 8.06 (d, 1H, *J* = 5.1 Hz), 7.00 (d, 1H, *J* = 5.1 Hz), 6.54 (dd, 1H, *J* = 7.5 Hz, *J* = 4.8 Hz), 3.51 (q, 2H, *J* = 6.8 Hz), 2.52 (s, 3H), 1.74-1.67 (m, 2H), 1.04 (t, 3H, *J* = 7.2 Hz).

<sup>13</sup>C NMR (CDCl<sub>3</sub>, 75 MHz, ppm) δ 161.0, 158.3, 156.5, 152.2, 143.8, 139.5, 137.0, 132.6, 121.9, 111.1, 103.2, 42.9, 22.7, 16.1, 11.7.

HRMS: *m/z* calcd for C<sub>15</sub>H<sub>16</sub>N<sub>4</sub>O [M]<sup>+</sup>: 268.1324. Found: 268.1322.

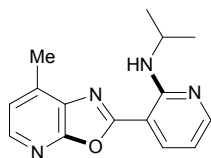

**3d:** Yield 69%. Colorless crystal, mp 121-122 °C.

<sup>1</sup>H NMR (CDCl<sub>3</sub>, 300 MHz, ppm)  $\delta$  8.43 (d, 1H,  $J$  = 6.8 Hz), 8.19 (dd, 1H,  $J$  = 10.3 Hz,  $J$  = 1.7 Hz), 8.13 (dd, 1H,  $J$  = 13.4 Hz,  $J$  = 2.0 Hz), 8.01 (d, 1H,  $J$  = 5.1 Hz), 6.95 (d, 1H,  $J$  = 5.1 Hz), 6.49 (dd, 1H,  $J$  = 7.5 Hz,  $J$  = 4.8 Hz), 4.37-4.26 (m, 1H), 2.49 (s, 3H), 1.28 (d, 6H,  $J$  = 6.2 Hz).

<sup>13</sup>C NMR (CDCl<sub>3</sub>, 75 MHz, ppm)  $\delta$  161.0, 158.3, 155.8, 152.2, 143.8, 139.3, 137.0, 132.6, 121.8, 110.9, 102.9, 42.5, 23.0, 15.9.

HRMS:  $m/z$  calcd for C<sub>15</sub>H<sub>16</sub>N<sub>4</sub>O [M]<sup>+</sup>: 268.1324. Found: 268.1323.

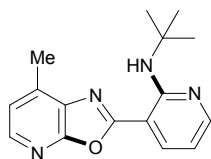

**3e:** Yield 62%. Colorless crystal, mp 161-163 °C.

<sup>1</sup>H NMR (CDCl<sub>3</sub>, 300 MHz, ppm)  $\delta$  8.79 (s, br, 1H), 8.29-8.27 (m, 2H), 8.16 (d, 1H,  $J$  = 5.1 Hz), 7.12 (d, 1H,  $J$  = 5.1 Hz), 6.61 (dd, 1H,  $J$  = 7.5 Hz,  $J$  = 5.1 Hz), 2.63 (s, 3H), 1.60 (s, 9H).

<sup>13</sup>C NMR (CDCl<sub>3</sub>, 75 MHz, ppm)  $\delta$  161.4, 158.5, 156.5, 151.7, 143.8, 139.5, 137.1, 132.7, 121.9, 110.8, 103.4, 51.8, 29.2, 16.0.

HRMS:  $m/z$  calcd for C<sub>16</sub>H<sub>18</sub>N<sub>4</sub>O [M]<sup>+</sup>: 282.1481. Found: 282.1484.

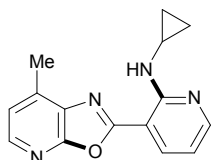

**3f:** Yield 78%. Colorless crystal, mp 138-139 °C.

<sup>1</sup>H NMR (CDCl<sub>3</sub>, 300 MHz, ppm)  $\delta$  8.62 (s, br, 1H), 8.31 (d, 1H,  $J$  = 4.8 Hz), 8.20 (d, 1H,  $J$  = 7.5 Hz), 8.08 (dd, 1H,  $J$  = 5.1 Hz,  $J$  = 1.3 Hz), 7.03 (d, 1H,  $J$  = 4.4 Hz), 6.63 (dd, 1H,  $J$  = 7.5 Hz,  $J$  = 5.0 Hz), 2.97-2.94 (m, 1H), 2.55 (s, 3H), 0.91-0.85 (m, 2H), 0.61-0.56 (m, 2H).

<sup>13</sup>C NMR (CDCl<sub>3</sub>, 75 MHz, ppm)  $\delta$  160.8, 158.4, 157.4, 152.3, 144.0, 139.6, 137.0, 132.5, 122.0, 112.0, 103.6, 24.0, 16.1, 7.3.

HRMS:  $m/z$  calcd for C<sub>15</sub>H<sub>14</sub>N<sub>4</sub>O [M]<sup>+</sup>: 266.1168. Found: 266.1169.

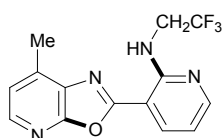

**3g:** Yield 86%. Colorless crystal, mp 146-147 °C.

<sup>1</sup>H NMR (CDCl<sub>3</sub>, 300 MHz, ppm)  $\delta$  8.97 (s, br, 1H), 8.32-8.27 (m, 2H), 8.16 (d, 1H,  $J$  = 4.8 Hz), 7.12 (d, 1H,  $J$  = 4.1 Hz), 6.79-6.75 (m, 1H), 4.49-4.38 (m, 2H), 2.62 (s, 3H).

<sup>13</sup>C NMR (CDCl<sub>3</sub>, 75 MHz, ppm)  $\delta$  160.4, 158.4, 155.6, 151.6, 144.4, 140.1, 137.3, 132.3, 125.0 ( $J$  = 279 Hz), 122.2, 113.3, 104.4, 41.9 ( $J$  = 34 Hz), 16.1.

HRMS:  $m/z$  calcd for  $C_{14}H_{11}F_3N_4O$   $[M]^+$ : 308.0885. Found: 308.0887.

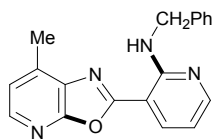

**3h:** Yield 85%. Colorless crystal, mp 175-176 °C.

$^1H$  NMR ( $CDCl_3$ , 300 MHz, ppm)  $\delta$  9.00 (t, 1H,  $J = 5.1$  Hz), 8.29-8.26 (m, 2H), 8.12 (d, 1H,  $J = 5.1$  Hz), 7.46 (d, 2H,  $J = 7.5$  Hz), 7.35 (t, 2H,  $J = 7.2$  Hz), 7.28 (d, 1H,  $J = 7.2$  Hz), 7.05 (d, 1H,  $J = 5.1$  Hz), 6.65 (dd, 1H,  $J = 7.5$  Hz,  $J = 4.8$  Hz), 4.86 (d, 2H,  $J = 5.5$  Hz), 2.51 (s, 3H).

$^{13}C$  NMR ( $CDCl_3$ , 75 MHz, ppm)  $\delta$  161.0, 158.4, 156.3, 152.2, 144.0, 139.7, 139.5, 137.2, 132.6, 128.6, 127.4, 127.1, 122.1, 111.8, 103.6, 45.2, 16.1.

HRMS:  $m/z$  calcd for  $C_{19}H_{16}N_4O$   $[M]^+$ : 316.1324. Found: 316.1325.

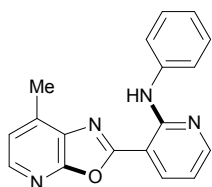

**3i:** Yield 93%. Colorless crystal, mp 190-191 °C.

$^1H$  NMR ( $CDCl_3$ , 300 MHz, ppm)  $\delta$  10.79 (s, br, 1H), 8.29-8.25 (m, 2H), 8.11 (d, 1H,  $J = 5.1$  Hz), 7.76 (s, 1H), 7.73 (s, 1H), 7.33 (t, 2H,  $J = 7.2$  Hz), 7.06-7.01 (m, 2H), 6.75-6.71 (m, 1H), 2.58 (s, 3H).

$^{13}C$  NMR ( $CDCl_3$ , 75 MHz, ppm)  $\delta$  160.4, 158.3, 153.7, 151.5, 144.4, 140.2, 140.0, 137.3, 132.3, 128.9, 122.7, 122.2, 120.4, 113.7, 104.6, 16.2.

HRMS:  $m/z$  calcd for  $C_{18}H_{14}N_4O$   $[M]^+$ : 302.1168. Found: 302.1167.

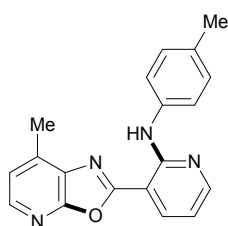

**3j:** Yield 91%. Colorless crystal, mp 188-189 °C.

$^1H$  NMR ( $CDCl_3$ , 300 MHz, ppm)  $\delta$  10.71 (s, br, 1H), 8.31-8.29 (m, 2H), 8.14 (d, 1H,  $J = 4.8$  Hz), 7.61 (d, 2H,  $J = 8.2$  Hz), 7.15 (d, 2H,  $J = 7.9$  Hz), 7.08 (d, 1H,  $J = 4.8$  Hz), 6.74 (t, 1H,  $J = 6.2$  Hz), 2.61 (s, 3H), 2.33 (s, 3H).

$^{13}C$  NMR ( $CDCl_3$ , 75 MHz, ppm)  $\delta$  160.5, 158.4, 154.0, 151.7, 144.4, 139.9, 137.4, 137.3, 132.4, 129.5, 122.2, 121.0, 113.4, 104.3, 21.0, 16.3.

HRMS:  $m/z$  calcd for  $C_{19}H_{16}N_4O$   $[M]^+$ : 316.1324. Found: 316.1321.

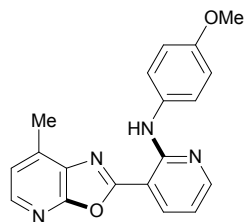

**3k:** Yield 88%. Colorless crystal, mp 156-157 °C.

<sup>1</sup>H NMR (CDCl<sub>3</sub>, 300 MHz, ppm)  $\delta$  10.61 (s, br, 1H), 8.34-8.29 (m, 2H), 8.16 (dd, 1H,  $J = 5.1$  Hz,  $J = 2.0$  Hz), 7.63 (d, 2H,  $J = 7.2$  Hz), 7.11 (d, 1H,  $J = 5.1$  Hz), 6.92 (d, 2H,  $J = 7.2$  Hz), 6.77-6.73 (m, 1H), 3.81 (s, 3H), 2.63 (d, 3H,  $J = 1.7$  Hz).

<sup>13</sup>C NMR (CDCl<sub>3</sub>, 75 MHz, ppm)  $\delta$  160.6, 158.4, 155.8, 154.2, 151.8, 144.4, 139.9, 137.4, 133.1, 132.4, 122.9, 122.2, 114.2, 113.2, 104.1, 55.6, 16.3.

HRMS:  $m/z$  calcd for C<sub>19</sub>H<sub>16</sub>N<sub>4</sub>O<sub>2</sub> [M]<sup>+</sup>: 332.1273. Found: 332.1270.

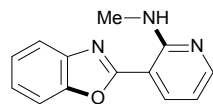

**5a:** Yield 73%. Colorless crystal, mp 100-101 °C.

<sup>1</sup>H NMR (CDCl<sub>3</sub>, 300 MHz, ppm)  $\delta$  8.54 (s, br, 1H), 8.28 (dd, 1H,  $J = 4.8$  Hz,  $J = 1.7$  Hz), 8.19 (dd, 1H,  $J = 7.6$  Hz,  $J = 1.7$  Hz), 7.69-7.66 (m, 1H), 7.50-7.47 (m, 1H), 7.31-7.28 (m, 2H), 6.59 (dd, 1H,  $J = 7.6$  Hz,  $J = 4.8$  Hz), 3.17 (d, 3H,  $J = 4.8$  Hz).

<sup>13</sup>C NMR (CDCl<sub>3</sub>, 75 MHz, ppm)  $\delta$  161.8, 156.9, 151.6, 149.5, 141.4, 136.6, 125.0, 124.5, 119.5, 111.0, 110.3, 104.3, 28.1.

HRMS:  $m/z$  calcd for C<sub>13</sub>H<sub>11</sub>N<sub>3</sub>O [M]<sup>+</sup>: 225.0902. Found: 225.0905.

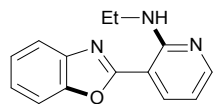

**5b:** Yield 75%. Colorless crystal, mp 65-67 °C.

<sup>1</sup>H NMR (CDCl<sub>3</sub>, 300 MHz, ppm)  $\delta$  8.59 (s, br, 1H), 8.26 (dd, 1H,  $J = 4.8$  Hz,  $J = 1.7$  Hz), 8.19 (dd, 1H,  $J = 7.6$  Hz,  $J = 1.7$  Hz), 7.70-7.67 (m, 1H), 7.50-7.47 (m, 1H), 7.31-7.27 (m, 2H), 6.58 (dd, 1H,  $J = 7.6$  Hz,  $J = 4.8$  Hz), 3.70-3.62 (m, 2H), 1.37 (t, 3H,  $J = 7.2$  Hz).

<sup>13</sup>C NMR (CDCl<sub>3</sub>, 75 MHz, ppm)  $\delta$  161.8, 156.3, 151.7, 149.5, 141.5, 136.7, 125.0, 124.5, 119.5, 111.0, 110.3, 104.0, 36.0, 15.1.

HRMS:  $m/z$  calcd for C<sub>14</sub>H<sub>13</sub>N<sub>3</sub>O [M]<sup>+</sup>: 239.1059. Found: 239.1060.

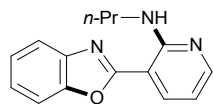

**5c:** Yield 82%. Colorless crystal, mp 49-50 °C.

<sup>1</sup>H NMR (CDCl<sub>3</sub>, 300 MHz, ppm)  $\delta$  8.67 (s, br, 1H), 8.26 (dd, 1H,  $J = 4.8$  Hz,  $J = 2.0$  Hz), 8.21 (dd, 1H,  $J = 7.6$  Hz,  $J = 1.7$  Hz), 7.70-7.67 (m, 1H), 7.51-7.48 (m, 1H), 7.31-7.28 (m, 2H), 6.58 (dd, 1H,  $J = 7.6$  Hz,  $J = 4.8$  Hz), 3.61-3.57 (m, 2H), 1.79-1.74 (m, 2H), 1.07 (t, 3H,  $J = 7.2$  Hz).

$^{13}\text{C}$  NMR ( $\text{CDCl}_3$ , 75 MHz, ppm)  $\delta$  161.8, 156.5, 151.7, 149.5, 141.5, 136.7, 125.0, 124.5, 119.5, 110.9, 110.3, 104.0, 43.1, 22.9, 11.8.

HRMS:  $m/z$  calcd for  $\text{C}_{15}\text{H}_{15}\text{N}_3\text{O}$   $[\text{M}]^+$ : 253.1215. Found: 253.1213.

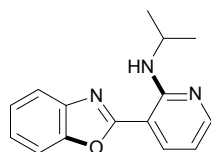

**5d:** Yield 70%. Colorless crystal, mp 91-92 °C.

$^1\text{H}$  NMR ( $\text{CDCl}_3$ , 300 MHz, ppm)  $\delta$  8.57 (d, 1H,  $J = 6.2$  Hz), 8.27 (dd, 1H,  $J = 4.8$  Hz,  $J = 2.0$  Hz), 8.23 (dd, 1H,  $J = 7.6$  Hz,  $J = 2.0$  Hz), 7.72-7.69 (m, 1H), 7.52-7.49 (m, 1H), 7.32-7.28 (m, 2H), 6.58 (dd, 1H,  $J = 7.9$  Hz,  $J = 4.8$  Hz), 4.49-4.43 (m, 1H), 1.38 (m, 6H,  $J = 6.5$  Hz).

$^{13}\text{C}$  NMR ( $\text{CDCl}_3$ , 75 MHz, ppm)  $\delta$  161.9, 155.8, 151.7, 149.5, 141.5, 136.8, 125.0, 124.5, 119.6, 110.9, 110.3, 103.9, 42.5, 23.2.

HRMS:  $m/z$  calcd for  $\text{C}_{15}\text{H}_{15}\text{N}_3\text{O}$   $[\text{M}]^+$ : 253.1215. Found: 253.1217.

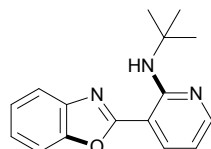

**5e:** Yield 68%. Colorless crystal, mp 100-101 °C.

$^1\text{H}$  NMR ( $\text{CDCl}_3$ , 300 MHz, ppm)  $\delta$  8.75 (s, br, 1H), 8.25-8.22 (m, 2H), 7.71-7.68 (m, 1H), 7.53-7.50 (m, 1H), 7.32-7.29 (m, 2H), 6.59-6.55 (m, 1H), 1.60 (s, 9H).

$^{13}\text{C}$  NMR ( $\text{CDCl}_3$ , 75 MHz, ppm)  $\delta$  162.2, 156.3, 151.1, 149.5, 141.5, 136.7, 124.9, 124.5, 119.6, 110.6, 110.2, 104.1, 51.8, 29.3.

HRMS:  $m/z$  calcd for  $\text{C}_{16}\text{H}_{17}\text{N}_3\text{O}$   $[\text{M}]^+$ : 267.1372. Found: 267.1374.

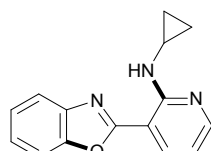

**5f:** Yield 76%. Colorless crystal, mp 105-106 °C.

$^1\text{H}$  NMR ( $\text{CDCl}_3$ , 300 MHz, ppm)  $\delta$  8.76 (s, br, 1H), 8.37 (dd, 1H,  $J = 4.8$  Hz,  $J = 1.7$  Hz), 8.23 (dd, 1H,  $J = 7.9$  Hz,  $J = 1.7$  Hz), 7.71-7.68 (m, 1H), 7.53-7.50 (m, 1H), 7.33-7.30 (m, 2H), 6.67 (dd, 1H,  $J = 7.9$  Hz,  $J = 5.1$  Hz), 3.03-2.98 (m, 1H), 0.96-0.90 (m, 2H), 0.71-0.66 (m, 2H).

$^{13}\text{C}$  NMR ( $\text{CDCl}_3$ , 75 MHz, ppm)  $\delta$  161.3, 157.3, 151.8, 149.5, 141.4, 136.6, 125.1, 124.5, 119.6, 111.8, 110.3, 104.4, 24.0, 7.3.

HRMS:  $m/z$  calcd for  $\text{C}_{15}\text{H}_{13}\text{N}_3\text{O}$   $[\text{M}]^+$ : 251.1059. Found: 251.1058.

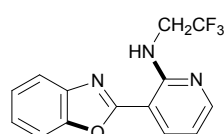

**5g:** Yield 65%. Colorless crystal, mp 113-114 °C.

$^1\text{H}$  NMR ( $\text{CDCl}_3$ , 300 MHz, ppm)  $\delta$  9.03 (s, br, 1H), 8.27-8.24 (m, 2H), 7.71-7.68 (m, 1H), 7.52-7.49 (m, 1H), 7.33-7.28 (m, 2H), 6.73 (dd, 1H,  $J = 7.2$  Hz,  $J = 5.1$  Hz), 4.49-4.37 (m, 2H).

$^{13}\text{C}$  NMR ( $\text{CDCl}_3$ , 75 MHz, ppm)  $\delta$  161.2, 155.5, 151.1, 149.5, 141.1, 136.8, 125.4, 125.1 ( $J = 279$  Hz), 124.7, 119.8, 113.1, 110.4, 105.2, 41.9 ( $J = 34$  Hz).

HRMS:  $m/z$  calcd for  $\text{C}_{14}\text{H}_{10}\text{F}_3\text{N}_3\text{O}$   $[\text{M}]^+$ : 293.0776. Found: 293.0774.

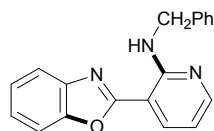

**5h**: Yield 69%. Colorless crystal, mp 106-107 °C.

$^1\text{H}$  NMR ( $\text{CDCl}_3$ , 300 MHz, ppm)  $\delta$  9.09 (s, br, 1H), 8.26-8.23 (m, 2H), 7.64-7.62 (m, 1H), 7.49-7.42 (m, 3H), 7.35-7.24 (m, 5H), 6.65-6.60 (m, 1H), 4.91 (d, 2H,  $J = 5.5$  Hz).

$^{13}\text{C}$  NMR ( $\text{CDCl}_3$ , 75 MHz, ppm)  $\delta$  161.7, 156.3, 151.7, 149.6, 141.5, 140.0, 136.7, 128.6, 127.4, 127.0, 125.1, 124.6, 119.7, 111.6, 110.3, 104.3, 44.9.

HRMS:  $m/z$  calcd for  $\text{C}_{19}\text{H}_{15}\text{N}_3\text{O}$   $[\text{M}]^+$ : 301.1215. Found: 301.1216.

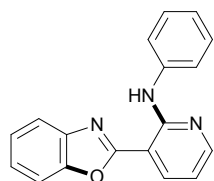

**5i**: Yield 80%. Colorless crystal, mp 122-123 °C.

$^1\text{H}$  NMR ( $\text{CDCl}_3$ , 300 MHz, ppm)  $\delta$  10.91 (s, br, 1H), 8.37-8.35 (m, 2H), 7.83 (s, 1H), 7.81 (s, 1H), 7.77-7.74 (m, 1H), 7.57-7.54 (m, 1H), 7.40-7.34 (m, 4H), 7.07 (t, 1H,  $J = 7.5$  Hz), 6.80 (dd, 1H,  $J = 7.5$  Hz,  $J = 5.1$  Hz).

$^{13}\text{C}$  NMR ( $\text{CDCl}_3$ , 75 MHz, ppm)  $\delta$  161.3, 153.9, 151.1, 149.6, 141.2, 140.2, 137.0, 128.9, 125.5, 124.9, 122.9, 121.1, 119.8, 113.5, 110.5, 105.4.

HRMS:  $m/z$  calcd for  $\text{C}_{18}\text{H}_{13}\text{N}_3\text{O}$   $[\text{M}]^+$ : 287.1059. Found: 287.1055.

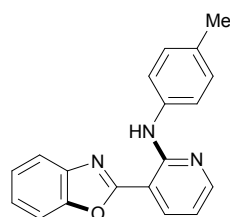

**5j**: Yield 81%. Colorless crystal, mp 131-132 °C.

$^1\text{H}$  NMR ( $\text{CDCl}_3$ , 300 MHz, ppm)  $\delta$  10.78 (s, br, 1H), 8.37-8.33 (m, 2H), 7.77-7.74 (m, 1H), 7.68 (s, 1H), 7.65 (s, 1H), 7.58-7.55 (m, 1H), 7.37-7.34 (m, 2H), 7.20 (s, 1H), 7.17 (s, 1H), 6.78 (dd, 1H,  $J = 7.5$  Hz,  $J = 4.8$  Hz), 2.35 (s, 3H).

$^{13}\text{C}$  NMR ( $\text{CDCl}_3$ , 75 MHz, ppm)  $\delta$  161.4, 154.1, 151.3, 149.6, 141.2, 137.4, 136.9, 132.6, 129.4, 125.4, 124.8, 121.6, 119.8, 113.2, 110.5, 105.2, 21.0.

HRMS:  $m/z$  calcd for  $\text{C}_{19}\text{H}_{15}\text{N}_3\text{O}$   $[\text{M}]^+$ : 301.1215. Found: 301.1211.



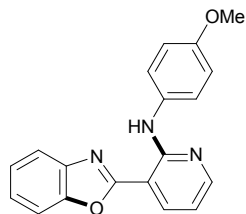

**5k:** Yield 85%. Colorless crystal, mp 141-142 °C.

<sup>1</sup>H NMR (CDCl<sub>3</sub>, 300 MHz, ppm)  $\delta$  10.66 (s, br, 1H), 8.36-8.31 (m, 2H), 7.76-7.73 (m, 1H), 7.66 (s, 1H), 7.63 (s, 1H), 7.57-7.54 (m, 1H), 7.36-7.34 (m, 2H), 6.96 (s, 1H), 6.93 (s, 1H), 6.77 (dd, 1H,  $J = 7.5$  Hz,  $J = 4.8$  Hz), 3.82 (s, 3H).

<sup>13</sup>C NMR (CDCl<sub>3</sub>, 75 MHz, ppm)  $\delta$  161.4, 155.9, 154.4, 151.3, 149.6, 141.2, 136.9, 133.1, 125.4, 124.7, 123.6, 119.7, 114.3, 113.0, 110.5, 104.9, 55.6.

HRMS:  $m/z$  calcd for C<sub>19</sub>H<sub>15</sub>N<sub>3</sub>O<sub>2</sub> [M]<sup>+</sup>: 317.1164. Found: 317.1162.

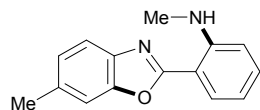

**7a:** Yield 80%. Colorless crystal, mp 140-141 °C.

<sup>1</sup>H NMR (CDCl<sub>3</sub>, 300 MHz, ppm)  $\delta$  8.22 (s, br, 1H), 8.06 (dd, 1H,  $J = 7.9$  Hz,  $J = 1.7$  Hz), 7.55 (d, 1H,  $J = 8.2$  Hz), 7.38-7.33 (m, 2H), 7.11 (d, 1H,  $J = 7.9$  Hz), 6.76-6.70 (m, 2H), 3.03 (d, 3H,  $J = 4.8$  Hz), 2.47 (s, 3H).

<sup>13</sup>C NMR (CDCl<sub>3</sub>, 150 MHz, ppm)  $\delta$  162.9, 149.5, 149.2, 139.6, 135.0, 132.6, 128.8, 125.4, 118.5, 115.0, 110.5, 110.4, 108.3, 29.8, 21.8.

HRMS:  $m/z$  calcd for C<sub>15</sub>H<sub>14</sub>N<sub>2</sub>O [M]<sup>+</sup>: 238.1106. Found: 238.1109.

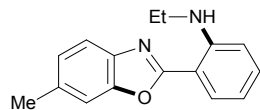

**7b:** Yield 73%. Colorless crystal, mp 107-108 °C.

<sup>1</sup>H NMR (CDCl<sub>3</sub>, 300 MHz, ppm)  $\delta$  8.23 (s, br, 1H), 8.06 (d, 1H,  $J = 7.9$  Hz), 7.56 (d, 1H,  $J = 8.2$  Hz), 7.36-7.31 (m, 2H), 7.11 (d, 1H,  $J = 8.2$  Hz), 6.76 (d, 1H,  $J = 8.6$  Hz), 6.70 (t, 1H,  $J = 7.9$  Hz), 3.39-3.34 (m, 2H), 2.48 (s, 3H), 1.40 (t, 3H,  $J = 7.2$  Hz).

<sup>13</sup>C NMR (CDCl<sub>3</sub>, 150 MHz, ppm)  $\delta$  162.9, 149.5, 148.3, 139.6, 135.0, 132.6, 128.9, 125.4, 118.6, 114.9, 110.9, 110.4, 108.1, 37.7, 21.8, 14.7.

HRMS:  $m/z$  calcd for C<sub>16</sub>H<sub>16</sub>N<sub>2</sub>O [M]<sup>+</sup>: 252.1263. Found: 252.1260.

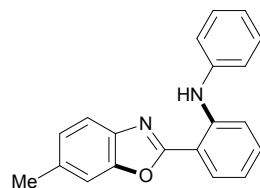

**7c:** Yield 82%. Colorless crystal, mp 122-123 °C.

<sup>1</sup>H NMR (CDCl<sub>3</sub>, 300 MHz, ppm)  $\delta$  10.22 (s, br, 1H), 8.17 (d, 1H,  $J = 7.9$  Hz), 7.60 (d, 1H,  $J = 8.2$  Hz), 7.41-7.29 (m, 7H), 7.18-7.15 (m, 2H), 6.88 (t, 1H,  $J = 7.9$  Hz), 2.52 (s, 3H).

$^{13}\text{C}$  NMR ( $\text{CDCl}_3$ , 150 MHz, ppm)  $\delta$  162.4, 149.5, 145.2, 141.3, 139.4, 135.4, 132.1, 129.4, 129.0, 125.7, 123.5, 122.7, 118.8, 117.6, 113.8, 110.6, 110.2, 21.8.

HRMS:  $m/z$  calcd for  $\text{C}_{20}\text{H}_{16}\text{N}_2\text{O}$   $[\text{M}]^+$ : 300.1263. Found: 300.1261.

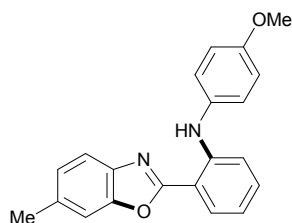

**7d**: Yield 78%. Colorless crystal, mp 164-165 °C.

$^1\text{H}$  NMR ( $\text{CDCl}_3$ , 300 MHz, ppm)  $\delta$  9.94 (s, br, 1H), 8.09 (d, 1H,  $J = 7.9$  Hz), 7.54 (d, 1H,  $J = 7.9$  Hz), 7.33 (s, 1H), 7.27-7.20 (m, 3H), 7.12-7.05 (m, 2H), 6.93 (s, 1H), 6.90 (s, 1H), 6.77 (t, 1H,  $J = 7.9$  Hz), 3.80 (s, 3H), 2.46 (s, 3H).

$^{13}\text{C}$  NMR ( $\text{CDCl}_3$ , 150 MHz, ppm)  $\delta$  162.6, 156.7, 149.5, 146.8, 139.4, 135.3, 133.9, 132.2, 128.9, 126.1, 125.6, 118.7, 116.8, 114.8, 113.1, 110.6, 109.2, 55.6, 21.9.

HRMS:  $m/z$  calcd for  $\text{C}_{21}\text{H}_{18}\text{N}_2\text{O}_2$   $[\text{M}]^+$ : 330.1368. Found: 330.1370.

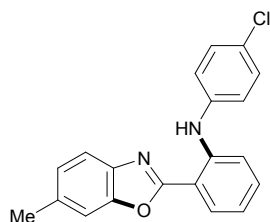

**7e**: Yield 70%. Colorless crystal, mp 156-157 °C.

$^1\text{H}$  NMR ( $\text{CDCl}_3$ , 300 MHz, ppm)  $\delta$  10.15 (s, br, 1H), 8.11 (d, 1H,  $J = 7.9$  Hz), 7.55 (d, 1H,  $J = 8.2$  Hz), 7.34-7.24 (m, 7H), 7.12 (d, 1H,  $J = 7.9$  Hz), 6.87-6.87 (m, 1H), 2.47 (s, 3H).

$^{13}\text{C}$  NMR ( $\text{CDCl}_3$ , 150 MHz, ppm)  $\delta$  162.2, 149.5, 144.7, 139.9, 139.2, 135.5, 132.1, 129.4, 129.1, 128.2, 125.7, 123.6, 118.8, 118.1, 113.8, 110.6, 110.5, 21.9.

HRMS:  $m/z$  calcd for  $\text{C}_{20}\text{H}_{15}\text{ClN}_2\text{O}$   $[\text{M}]^+$ : 334.0873. Found: 334.0876.

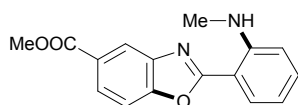

**7f**: Yield 78%. Colorless crystal, mp 139-140 °C.

$^1\text{H}$  NMR ( $\text{CDCl}_3$ , 300 MHz, ppm)  $\delta$  8.38 (s, 1H), 8.18 (s, br, 1H), 8.07-8.04 (m, 2H), 7.55 (d, 1H,  $J = 8.6$  Hz), 7.40 (t, 1H,  $J = 8.6$  Hz), 6.79-6.71 (m, 2H), 3.95 (s, 3H), 3.05 (d, 3H,  $J = 4.8$  Hz).

$^{13}\text{C}$  NMR ( $\text{CDCl}_3$ , 150 MHz, ppm)  $\delta$  166.9, 164.6, 152.1, 149.6, 141.9, 133.4, 129.0, 126.7, 126.6, 121.0, 115.1, 110.6, 109.9, 107.3, 52.3, 29.8.

HRMS:  $m/z$  calcd for  $\text{C}_{16}\text{H}_{14}\text{N}_2\text{O}_3$   $[\text{M}]^+$ : 282.1004. Found: 282.1006.

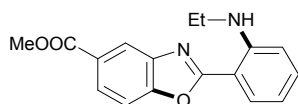

**7g:** Yield 75%. Colorless crystal, mp 103-104 °C.

<sup>1</sup>H NMR (CDCl<sub>3</sub>, 300 MHz, ppm) δ 8.36 (s, 1H), 8.17 (s, br, 1H), 8.05-8.02 (m, 2H), 7.51 (d, 1H, *J* = 8.6 Hz), 7.34 (t, 1H, *J* = 8.6 Hz), 6.77-6.67 (m, 2H), 3.94 (s, 3H), 3.37-3.33 (m, 2H), 1.41 (t, 3H, *J* = 7.2 Hz).

<sup>13</sup>C NMR (CDCl<sub>3</sub>, 150 MHz, ppm) δ 166.9, 164.6, 152.1, 148.7, 142.0, 133.3, 129.1, 126.7, 126.6, 121.1, 114.9, 111.0, 109.9, 107.1, 52.3, 37.7, 14.6.

HRMS: *m/z* calcd for C<sub>17</sub>H<sub>16</sub>N<sub>2</sub>O<sub>3</sub> [M]<sup>+</sup>: 296.1161. Found: 296.1165.

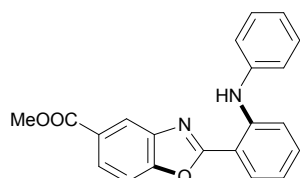

**7h:** Yield 80%. Colorless crystal, mp 153-154 °C.

<sup>1</sup>H NMR (CDCl<sub>3</sub>, 300 MHz, ppm) δ 10.08 (s, br, 1H), 8.38 (s, 1H), 8.11 (d, 1H, *J* = 7.5 Hz), 8.06 (d, 1H, *J* = 8.6 Hz), 7.55 (d, 1H, *J* = 8.6 Hz), 7.41-7.30 (m, 6H), 7.12 (t, 1H, *J* = 6.8 Hz), 6.84 (t, 1H, *J* = 7.9 Hz), 3.94 (s, 3H).

<sup>13</sup>C NMR (CDCl<sub>3</sub>, 150 MHz, ppm) δ 166.8, 164.1, 152.1, 145.7, 141.7, 140.9, 132.8, 129.5, 129.2, 126.9, 123.8, 122.8, 121.3, 117.7, 113.9, 110.1, 109.2, 52.3.

HRMS: *m/z* calcd for C<sub>21</sub>H<sub>16</sub>N<sub>2</sub>O<sub>3</sub> [M]<sup>+</sup>: 344.1161. Found: 344.1165.

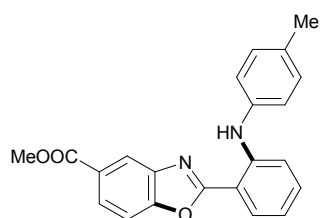

**7i:** Yield 81%. Colorless crystal, mp 168-169 °C.

<sup>1</sup>H NMR (CDCl<sub>3</sub>, 300 MHz, ppm) δ 9.98 (s, br, 1H), 8.38 (s, 1H), 8.11-8.05 (m, 2H), 7.56 (d, 1H, *J* = 8.2 Hz), 7.28-7.17 (m, 6H), 6.81 (t, 1H, *J* = 7.9 Hz), 3.94 (s, 3H), 2.36 (s, 3H).

<sup>13</sup>C NMR (CDCl<sub>3</sub>, 150 MHz, ppm) δ 166.8, 164.2, 152.2, 146.3, 141.7, 138.1, 133.7, 132.8, 130.1, 129.2, 126.9, 123.5, 121.2, 117.2, 113.6, 110.1, 108.7, 52.3, 21.0.

HRMS: *m/z* calcd for C<sub>22</sub>H<sub>18</sub>N<sub>2</sub>O<sub>3</sub> [M]<sup>+</sup>: 358.1317. Found: 358.1318.

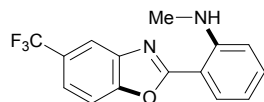

**7j:** Yield 70%. Colorless crystal, mp 98-99 °C.

<sup>1</sup>H NMR (CDCl<sub>3</sub>, 300 MHz, ppm) δ 8.15 (s, br, 1H), 8.07 (d, 1H, *J* = 7.9 Hz), 7.96 (s, 1H), 7.63-7.59 (m, 2H), 7.41 (t, 1H, *J* = 7.9 Hz), 6.79-6.72 (m, 2H), 3.05 (d, 3H, *J* = 4.8 Hz).

<sup>13</sup>C NMR (CDCl<sub>3</sub>, 150 MHz, ppm) δ 165.0, 150.9, 149.7, 142.0, 133.6, 129.1, 127.0 (*J* = 33 Hz), 124.4 (*J* = 272 Hz), 121.8, 116.7 (*J* = 4 Hz), 115.1, 110.7, 110.5, 107.1, 29.8.

HRMS: *m/z* calcd for C<sub>15</sub>H<sub>11</sub>F<sub>3</sub>N<sub>2</sub>O [M]<sup>+</sup>: 292.0823. Found: 292.0824.

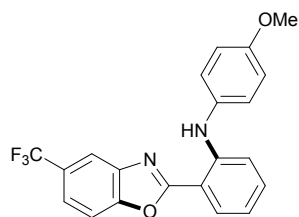

**7k:** Yield 72%. Colorless crystal, mp 127-128 °C.

$^1\text{H NMR}$  ( $\text{CDCl}_3$ , 300 MHz, ppm)  $\delta$  9.82 (s, br, 1H), 8.11 (d, 1H,  $J = 7.9$  Hz), 7.97 (s, 1H), 7.62-7.60 (m, 2H), 7.27-7.25 (m, 3H), 7.07 (d, 1H,  $J = 8.6$  Hz), 6.96 (s, 1H), 6.93 (s, 1H), 6.79 (t, 1H,  $J = 7.9$  Hz), 3.83 (s, 3H).

$^{13}\text{C NMR}$  ( $\text{CDCl}_3$ , 150 MHz, ppm)  $\delta$  163.6, 155.9, 149.9, 146.3, 140.7, 132.3, 132.0, 128.0, 126.1 ( $J = 32$  Hz), 125.1, 123.2 ( $J = 272$  Hz), 120.9, 115.8 ( $J = 3$  Hz), 115.7, 113.7, 112.2, 109.5, 106.8, 54.5.

HRMS:  $m/z$  calcd for  $\text{C}_{21}\text{H}_{15}\text{F}_3\text{N}_2\text{O}_2$  [ $\text{M}$ ] $^+$ : 384.1086. Found: 384.1088.

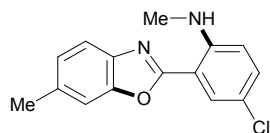

**7l:** Yield 75%. Colorless crystal, mp 148-149 °C.

$^1\text{H NMR}$  ( $\text{CDCl}_3$ , 300 MHz, ppm)  $\delta$  8.21 (s, br, 1H), 8.02 (t, 1H,  $J = 2.7$  Hz), 7.55 (dd, 1H,  $J = 8.2$  Hz,  $J = 2.4$  Hz), 7.34 (s, 1H), 7.29 (d, 1H,  $J = 8.9$  Hz), 7.13 (d, 1H,  $J = 7.9$  Hz), 6.67 (dd, 1H,  $J = 8.9$  Hz,  $J = 2.4$  Hz), 3.02 (d, 3H,  $J = 4.8$  Hz), 2.49 (s, 3H).

$^{13}\text{C NMR}$  ( $\text{CDCl}_3$ , 150 MHz, ppm)  $\delta$  161.6, 149.4, 147.7, 139.4, 135.5, 132.3, 127.9, 125.7, 119.6, 118.7, 111.8, 110.5, 109.2, 29.9, 21.8.

HRMS:  $m/z$  calcd for  $\text{C}_{15}\text{H}_{13}\text{ClN}_2\text{O}$  [ $\text{M}$ ] $^+$ : 272.0716. Found: 272.0713.

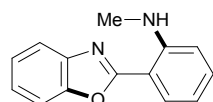

**7m:** Yield 85%. Colorless crystal, mp 159-161 °C.

$^1\text{H NMR}$  ( $\text{CDCl}_3$ , 300 MHz, ppm)  $\delta$  8.22 (s, br, 1H), 8.08 (d, 1H,  $J = 7.9$  Hz), 7.68 (t, 1H,  $J = 4.6$  Hz), 7.52 (t, 1H,  $J = 4.6$  Hz), 7.36 (t, 1H,  $J = 7.4$  Hz), 7.30-7.27 (m, 2H), 6.76-6.69 (m, 2H), 3.02 (s, 3H).

$^{13}\text{C NMR}$  ( $\text{CDCl}_3$ , 150 MHz, ppm)  $\delta$  162.2, 148.2, 148.0, 140.6, 131.7, 127.8, 123.4, 123.1, 118.0, 113.9, 109.4, 109.0, 106.9, 28.6.

HRMS:  $m/z$  calcd for  $\text{C}_{14}\text{H}_{12}\text{N}_2\text{O}$  [ $\text{M}$ ] $^+$ : 224.0950. Found: 224.0953.

The NMR data are consistent with the reported ones.<sup>[1, 2]</sup>

### 3. References

- [1] K. Wojciechowski, U. Siedlecka, H. Modrzejewska, S. Kosinski, *Tetrahedron*, 2002, **58**, 7583.
- [2] D. Miao, X. Shi, G. He, Y. Tong, Z. Jiang, S. Han, *Tetrahedron*, 2015, **71**, 431.

## 4. NMR Spectra

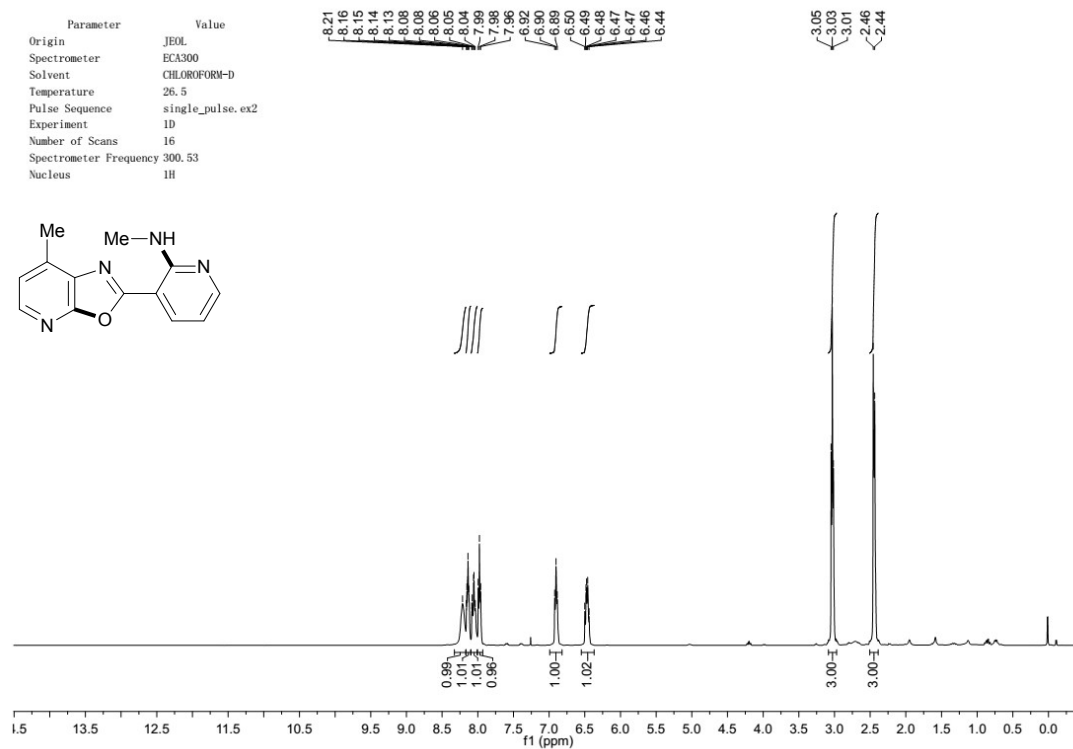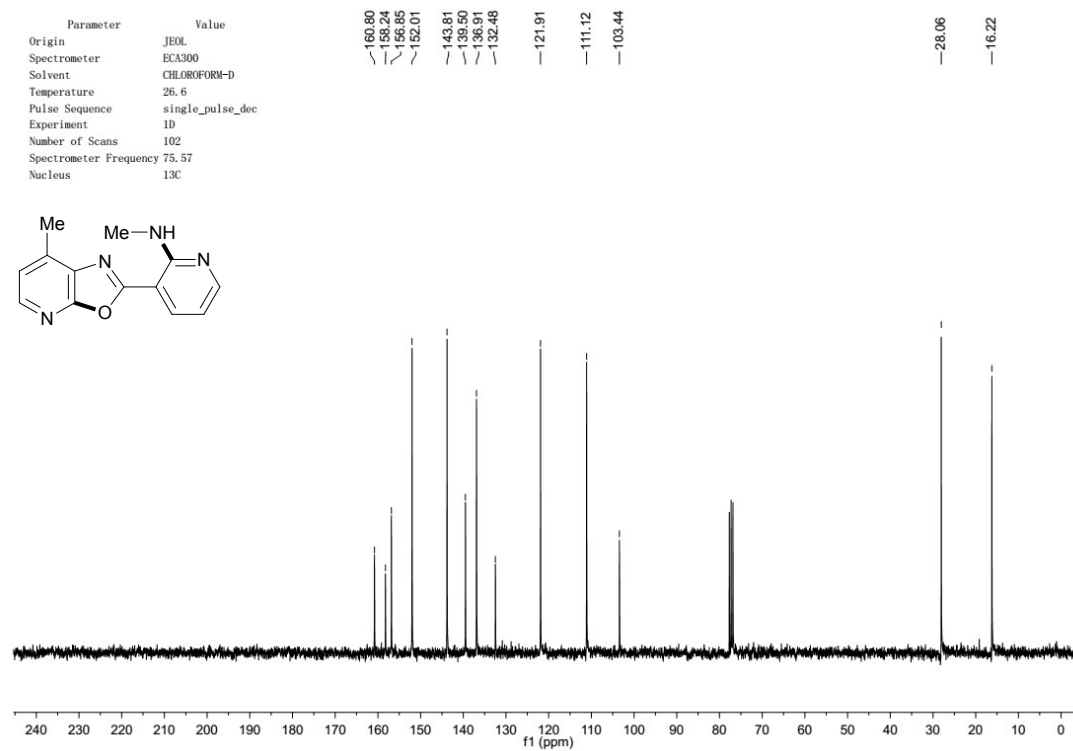

| Parameter              | Value            |
|------------------------|------------------|
| Origin                 | JEOL             |
| Spectrometer           | ECA300           |
| Solvent                | CHLOROFORM-D     |
| Temperature            | 26.2             |
| Pulse Sequence         | single_pulse.ex2 |
| Experiment             | 1D               |
| Number of Scans        | 16               |
| Spectrometer Frequency | 300.53           |
| Nucleus                | 1H               |

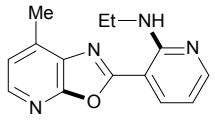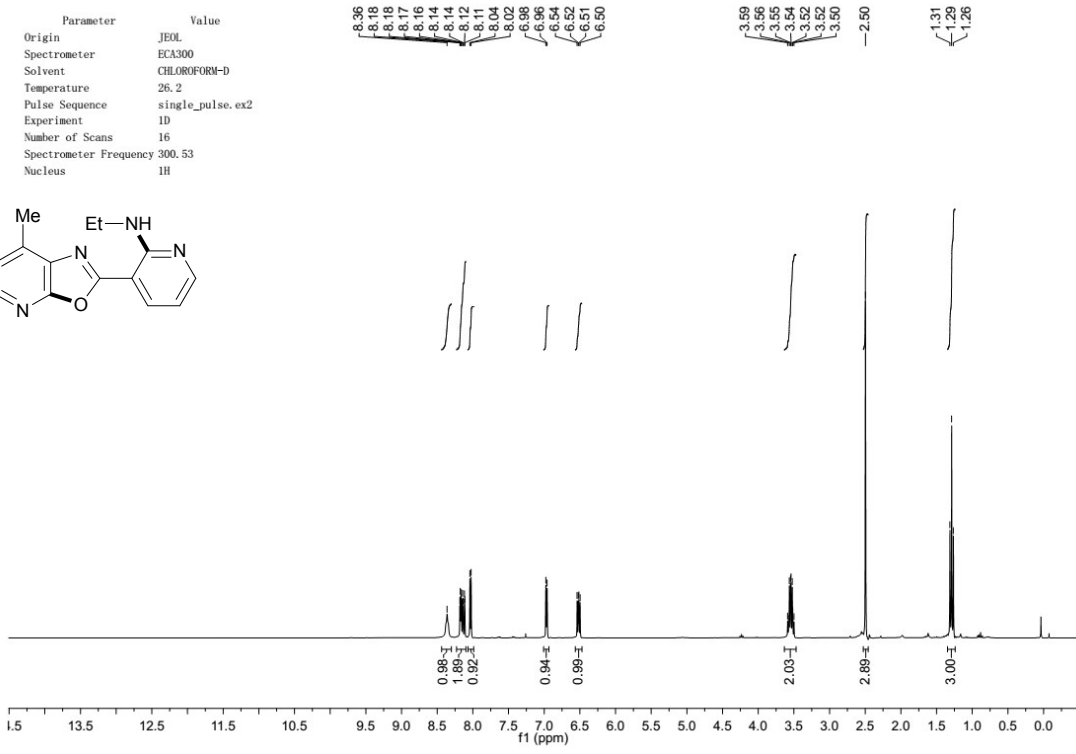

| Parameter              | Value            |
|------------------------|------------------|
| Origin                 | JEOL             |
| Spectrometer           | ECA300           |
| Solvent                | CHLOROFORM-D     |
| Temperature            | 26.3             |
| Pulse Sequence         | single_pulse_dec |
| Experiment             | 1D               |
| Number of Scans        | 72               |
| Spectrometer Frequency | 75.57            |
| Nucleus                | 13C              |

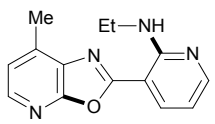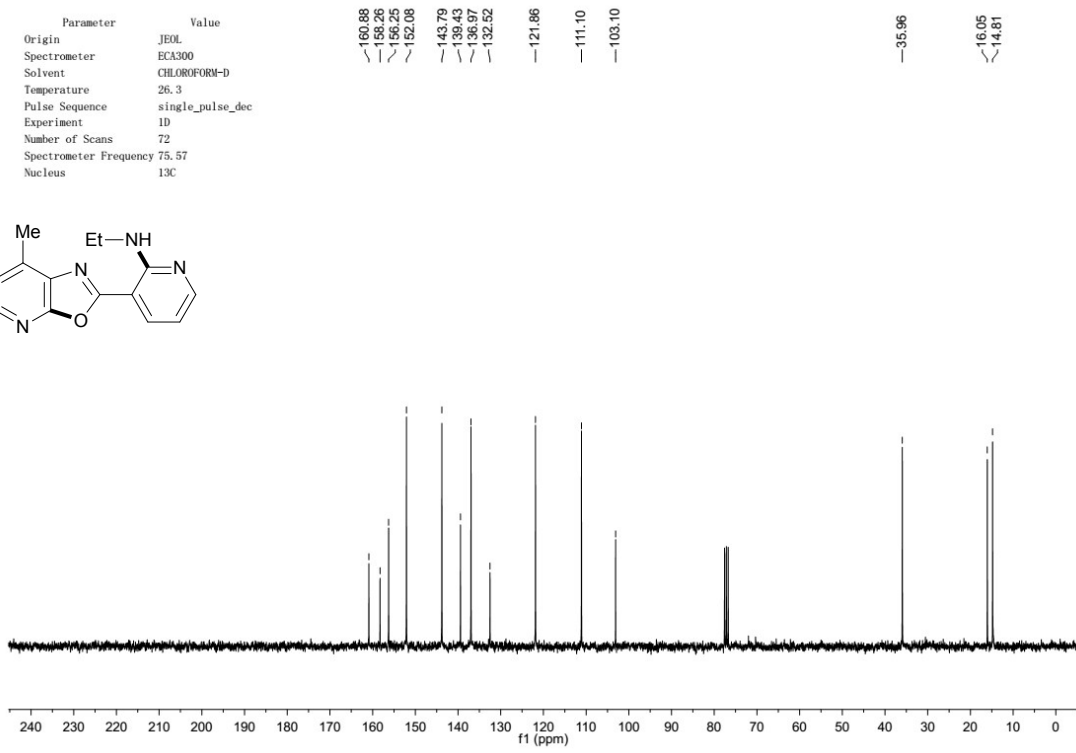

| Parameter              | Value            |
|------------------------|------------------|
| Origin                 | JEOL             |
| Spectrometer           | ECA300           |
| Solvent                | CHLOROFORM-D     |
| Temperature            | 26.9             |
| Pulse Sequence         | single_pulse.ex2 |
| Experiment             | 1D               |
| Number of Scans        | 16               |
| Spectrometer Frequency | 300.53           |
| Nucleus                | <sup>1</sup> H   |

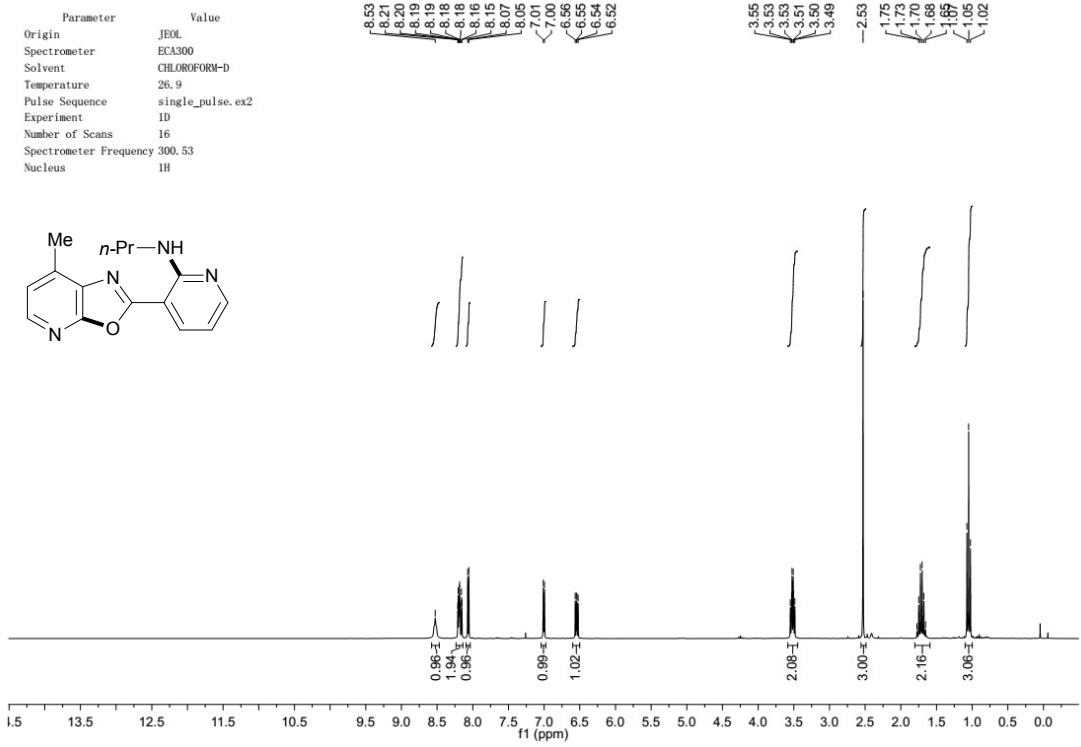

| Parameter              | Value            |
|------------------------|------------------|
| Origin                 | JEOL             |
| Spectrometer           | ECA300           |
| Solvent                | CHLOROFORM-D     |
| Temperature            | 27.0             |
| Pulse Sequence         | single_pulse_dec |
| Experiment             | 1D               |
| Number of Scans        | 80               |
| Spectrometer Frequency | 75.57            |
| Nucleus                | <sup>13</sup> C  |

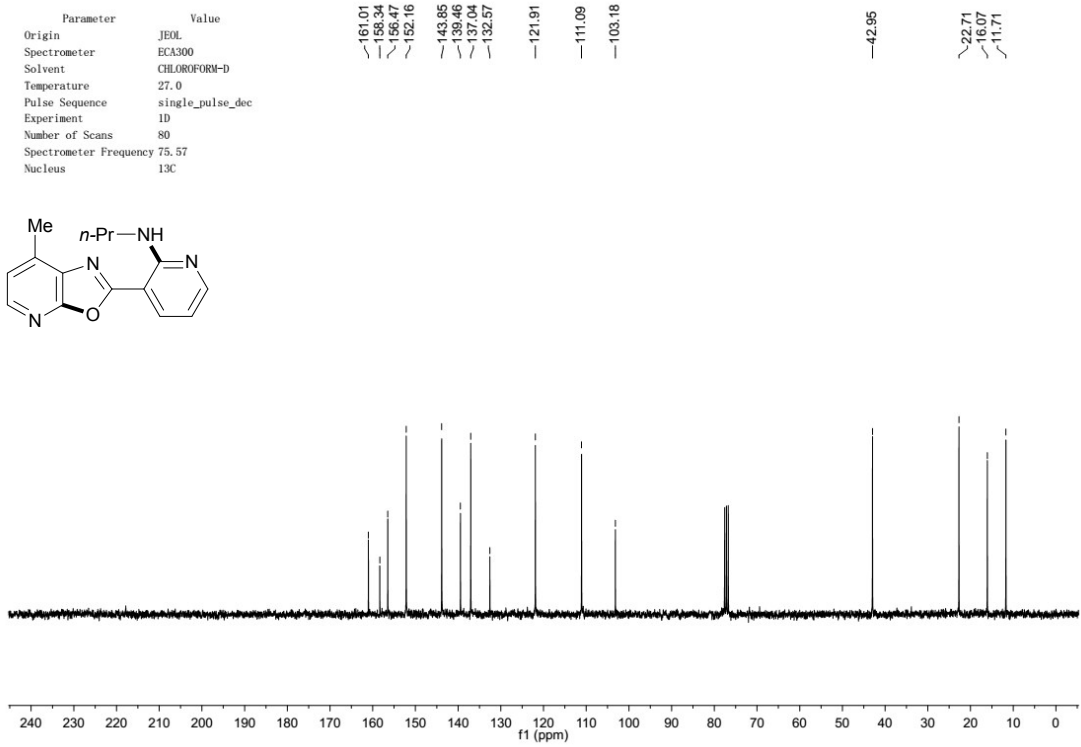



| Parameter              | Value            |
|------------------------|------------------|
| Origin                 | JEOL             |
| Spectrometer           | ECA300           |
| Solvent                | CHLOROFORM-D     |
| Temperature            | 26.9             |
| Pulse Sequence         | single_pulse.ex2 |
| Experiment             | 1D               |
| Number of Scans        | 16               |
| Spectrometer Frequency | 300.53           |
| Nucleus                | 1H               |

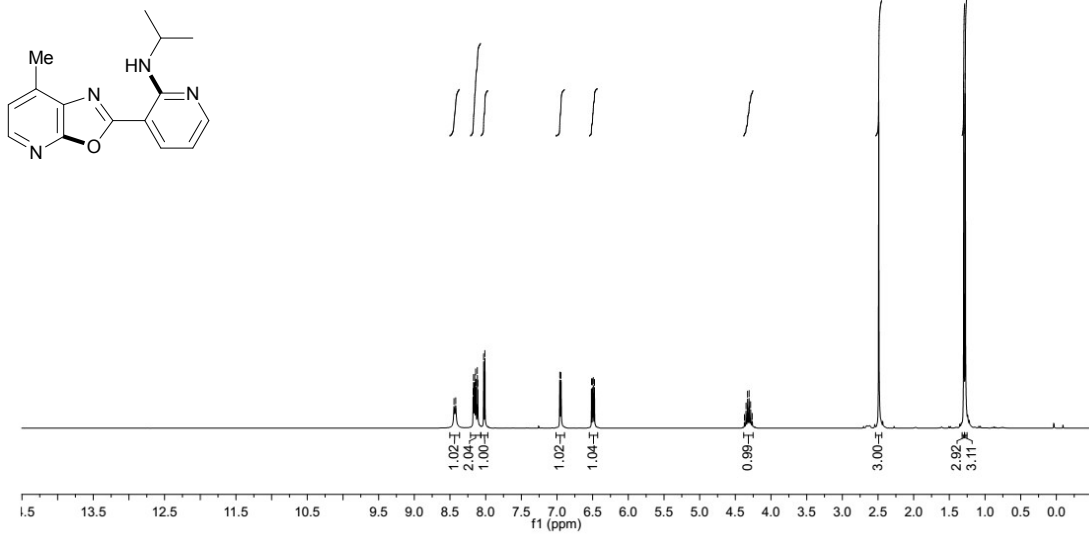

| Parameter              | Value            |
|------------------------|------------------|
| Origin                 | JEOL             |
| Spectrometer           | ECA300           |
| Solvent                | CHLOROFORM-D     |
| Temperature            | 27.0             |
| Pulse Sequence         | single_pulse_dec |
| Experiment             | 1D               |
| Number of Scans        | 72               |
| Spectrometer Frequency | 75.57            |
| Nucleus                | 13C              |

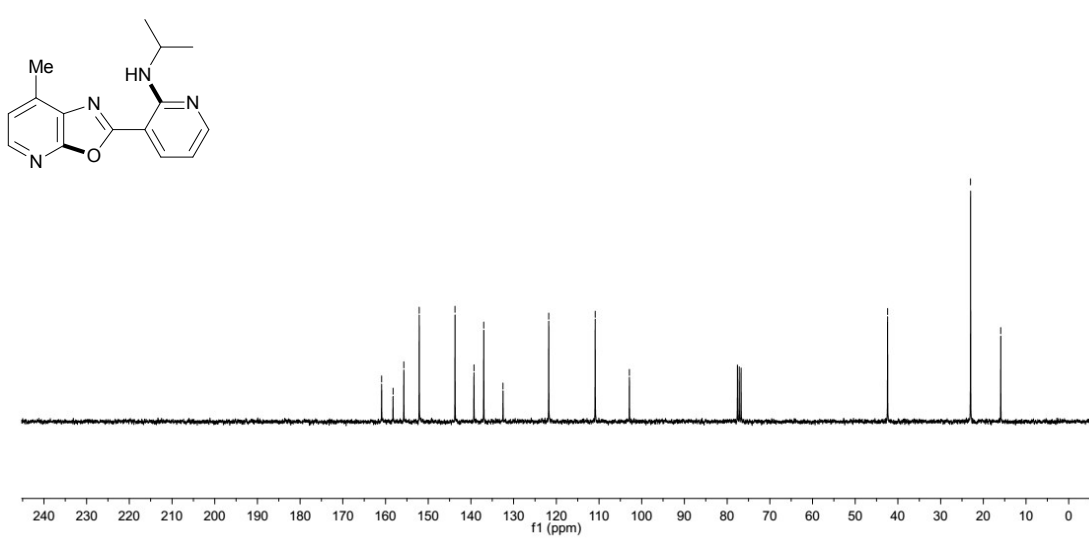

| Parameter              | Value            |
|------------------------|------------------|
| Origin                 | JEOL             |
| Spectrometer           | ECA300           |
| Solvent                | CHLOROFORM-D     |
| Temperature            | 412.0            |
| Pulse Sequence         | single_pulse.ex2 |
| Experiment             | 1D               |
| Number of Scans        | 16               |
| Spectrometer Frequency | 300.53           |
| Nucleus                | <sup>1</sup> H   |

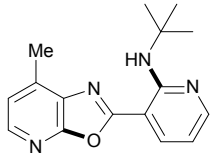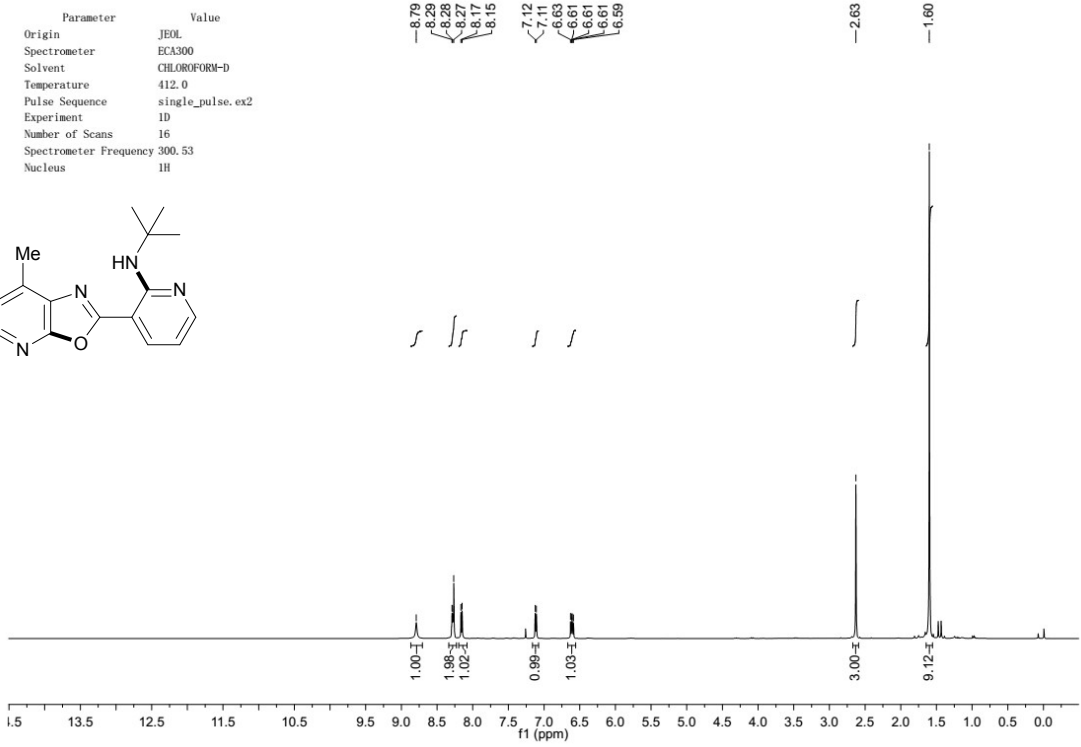

| Parameter              | Value            |
|------------------------|------------------|
| Origin                 | JEOL             |
| Spectrometer           | ECA300           |
| Solvent                | CHLOROFORM-D     |
| Temperature            | 26.8             |
| Pulse Sequence         | single_pulse_dec |
| Experiment             | 1D               |
| Number of Scans        | 80               |
| Spectrometer Frequency | 75.57            |
| Nucleus                | <sup>13</sup> C  |

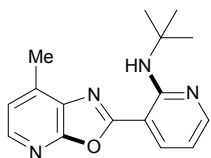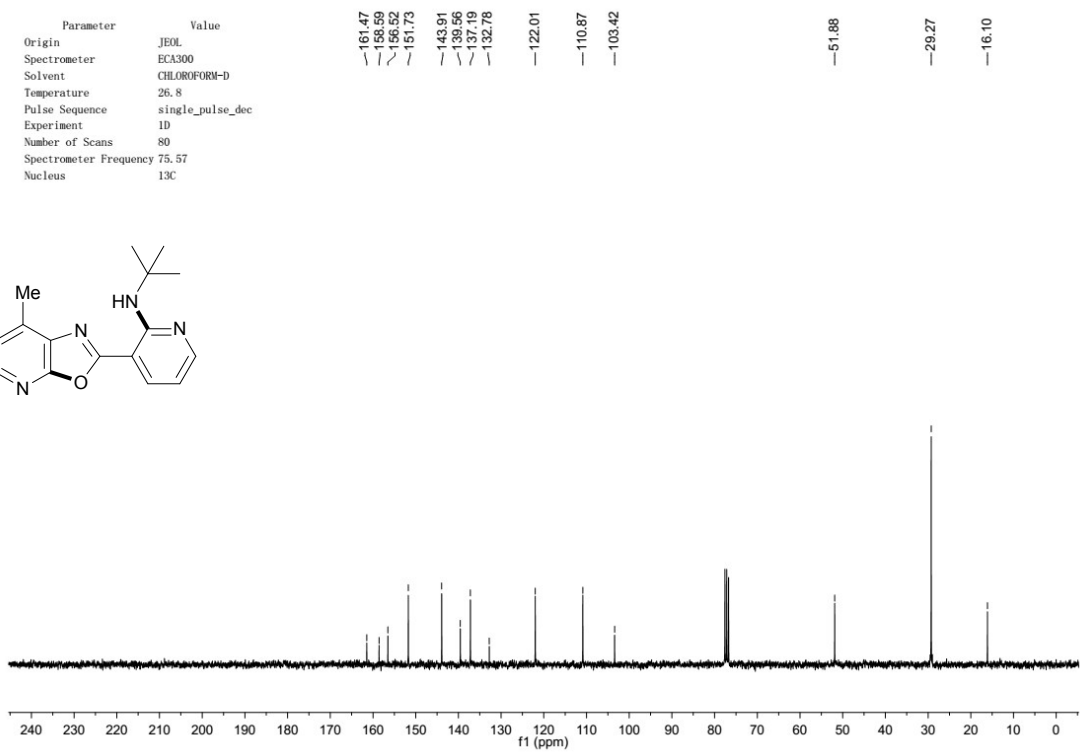

Parameter Value  
 Origin JEOL  
 Spectrometer ECA300  
 Solvent CHLOROFORM-D  
 Temperature 26.6  
 Pulse Sequence single\_pulse.ex2  
 Experiment 1D  
 Number of Scans 16  
 Spectrometer Frequency 300.53  
 Nucleus 1H

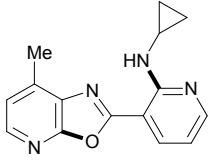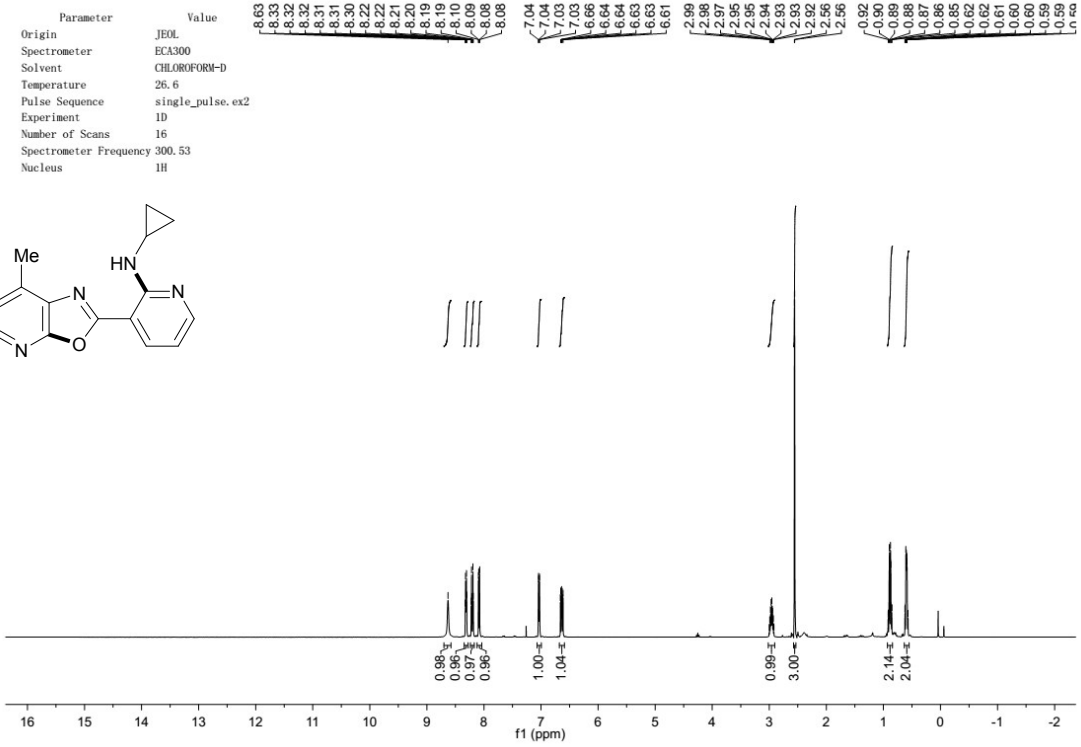

Parameter Value  
 Origin JEOL  
 Spectrometer ECA300  
 Solvent CHLOROFORM-D  
 Temperature 26.7  
 Pulse Sequence single\_pulse\_dec  
 Experiment 1D  
 Number of Scans 56  
 Spectrometer Frequency 75.57  
 Nucleus 13C

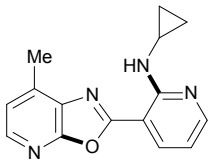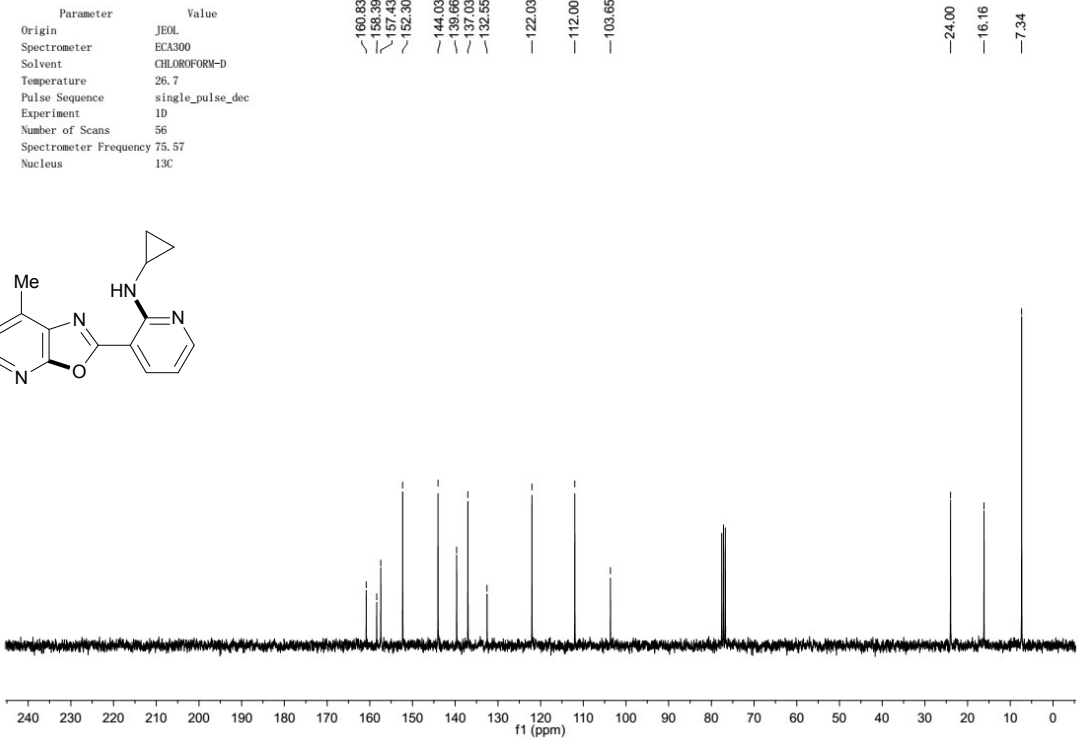

| Parameter              | Value            |
|------------------------|------------------|
| Origin                 | JEOL             |
| Spectrometer           | ECA300           |
| Solvent                | CHLOROFORM-D     |
| Temperature            | 21.7             |
| Pulse Sequence         | single_pulse.ex2 |
| Experiment             | 1D               |
| Number of Scans        | 16               |
| Spectrometer Frequency | 300.53           |
| Nucleus                | 1H               |

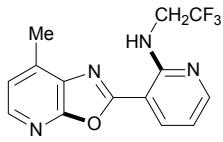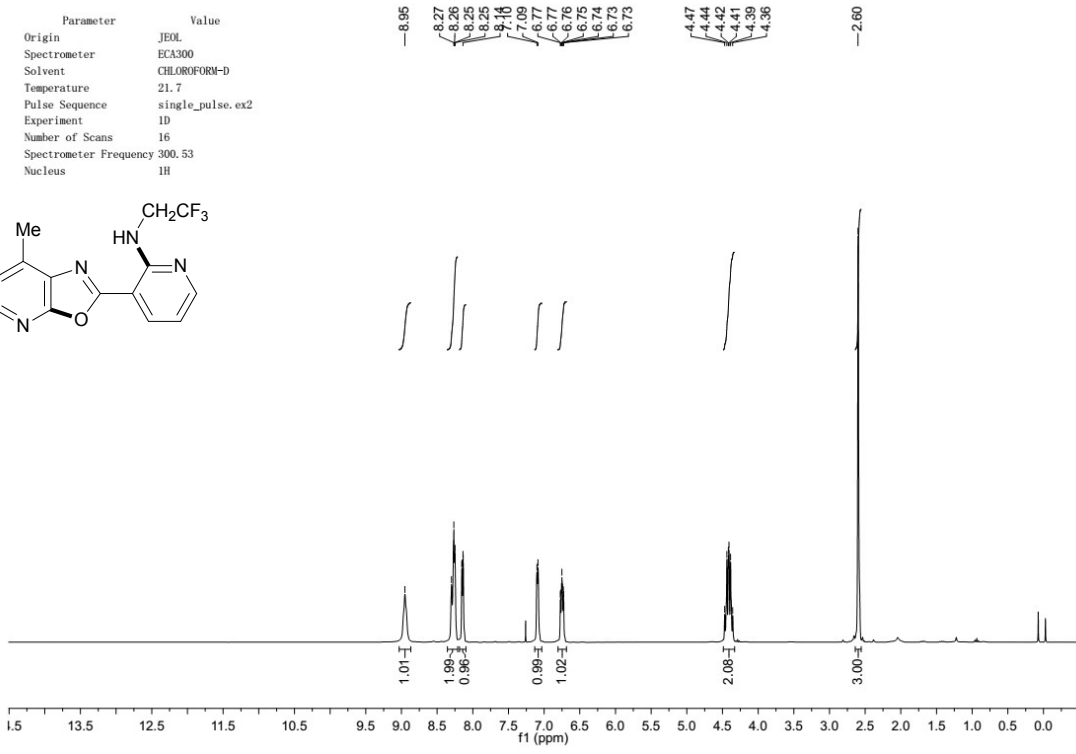

| Parameter              | Value            |
|------------------------|------------------|
| Origin                 | JEOL             |
| Spectrometer           | ECA300           |
| Solvent                | CHLOROFORM-D     |
| Temperature            | 22.0             |
| Pulse Sequence         | single_pulse_dec |
| Experiment             | 1D               |
| Number of Scans        | 136              |
| Spectrometer Frequency | 75.57            |
| Nucleus                | 13C              |

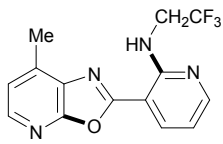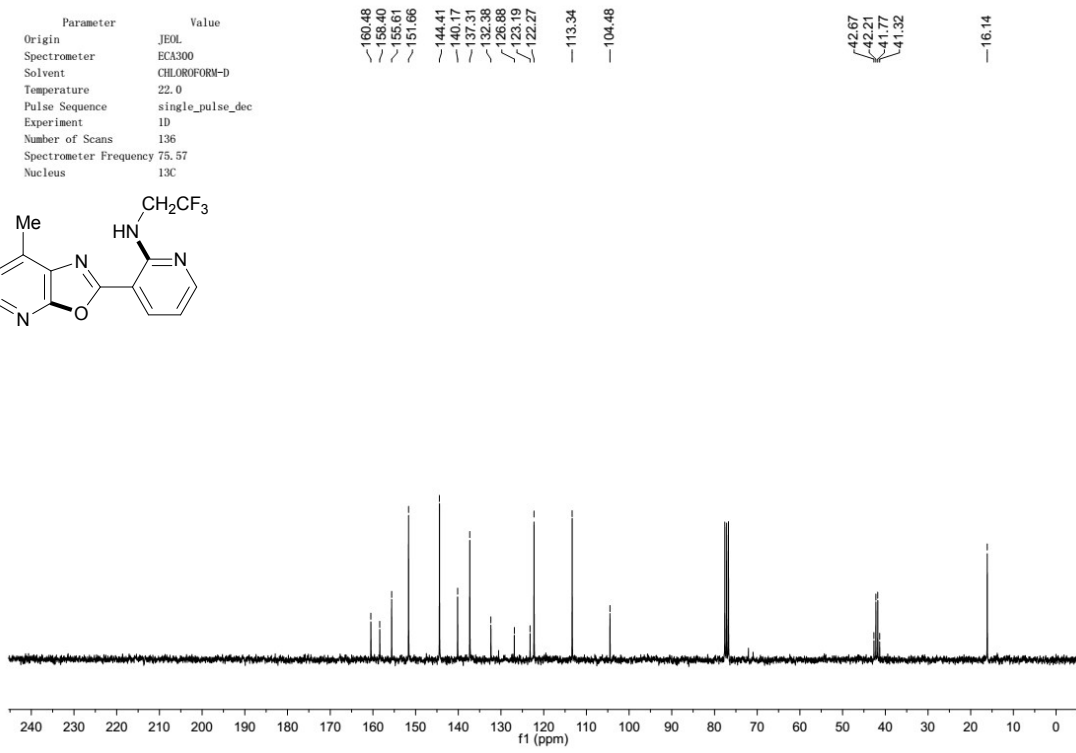

| Parameter              | Value            |
|------------------------|------------------|
| Origin                 | JEOL             |
| Spectrometer           | ECA300           |
| Solvent                | CHLOROFORM-D     |
| Temperature            | 25.8             |
| Pulse Sequence         | single_pulse.ex2 |
| Experiment             | 1D               |
| Number of Scans        | 16               |
| Spectrometer Frequency | 300.53           |
| Nucleus                | 1H               |

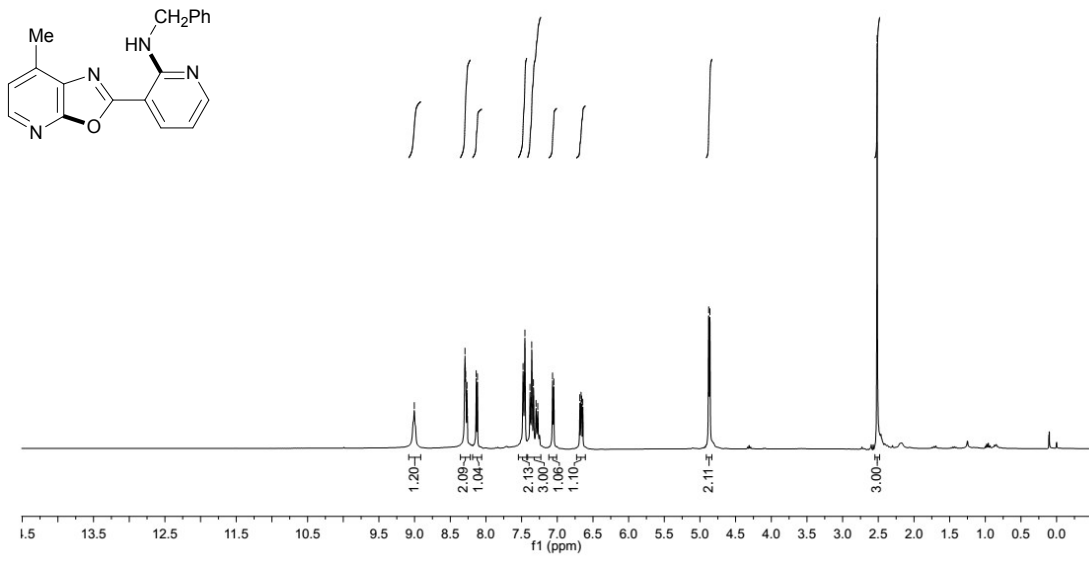

| Parameter              | Value            |
|------------------------|------------------|
| Origin                 | JEOL             |
| Spectrometer           | ECA300           |
| Solvent                | CHLOROFORM-D     |
| Temperature            | 25.9             |
| Pulse Sequence         | single_pulse_dec |
| Experiment             | 1D               |
| Number of Scans        | 64               |
| Spectrometer Frequency | 75.57            |
| Nucleus                | 13C              |

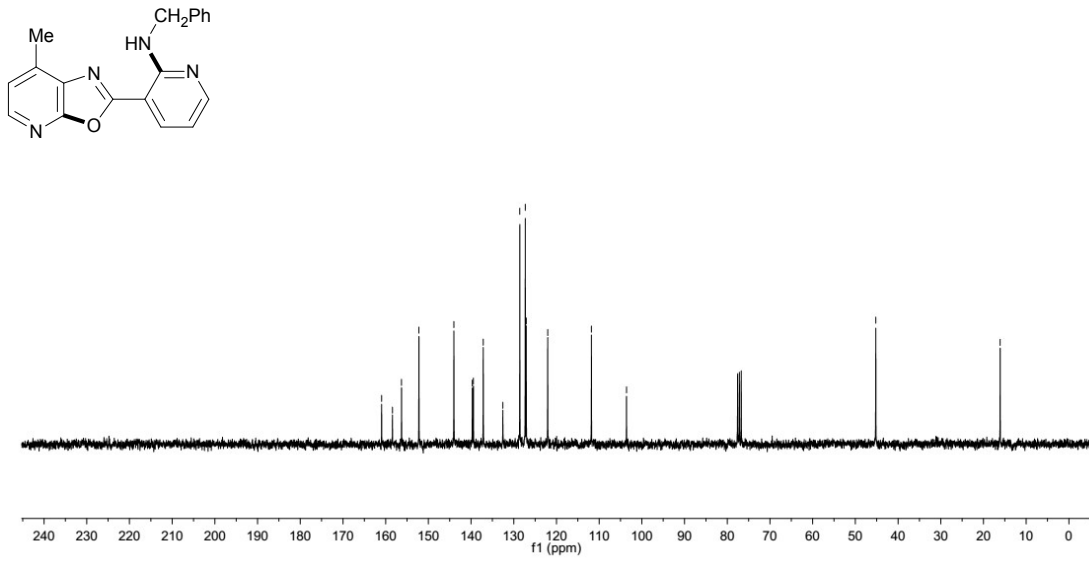

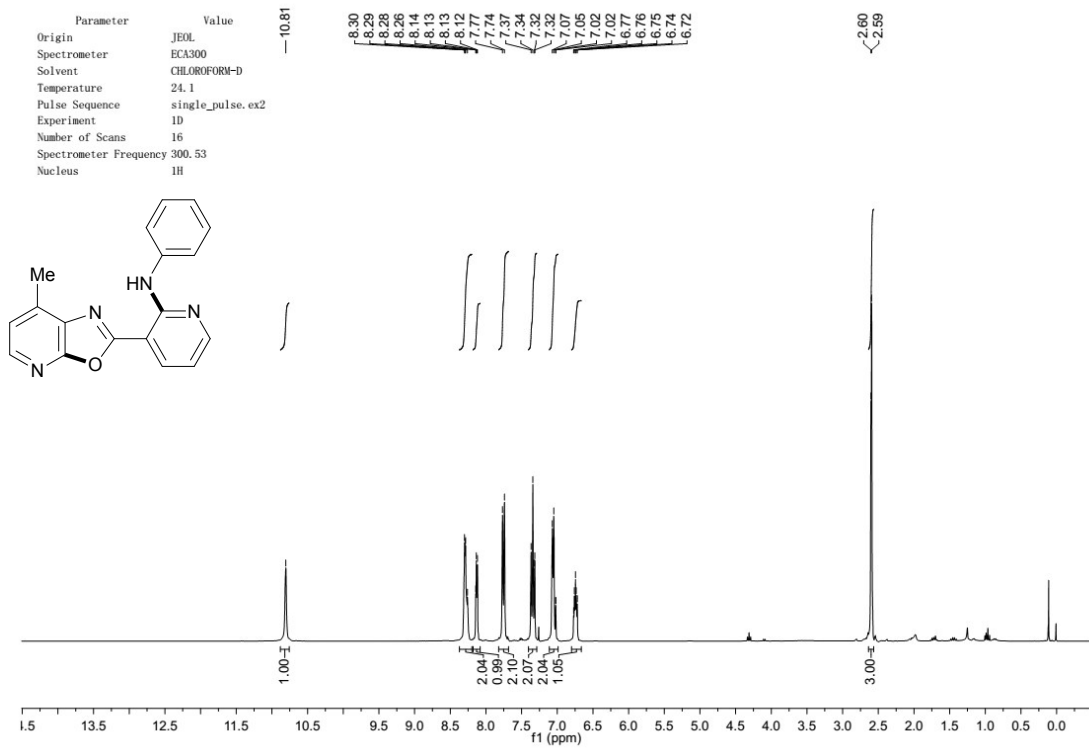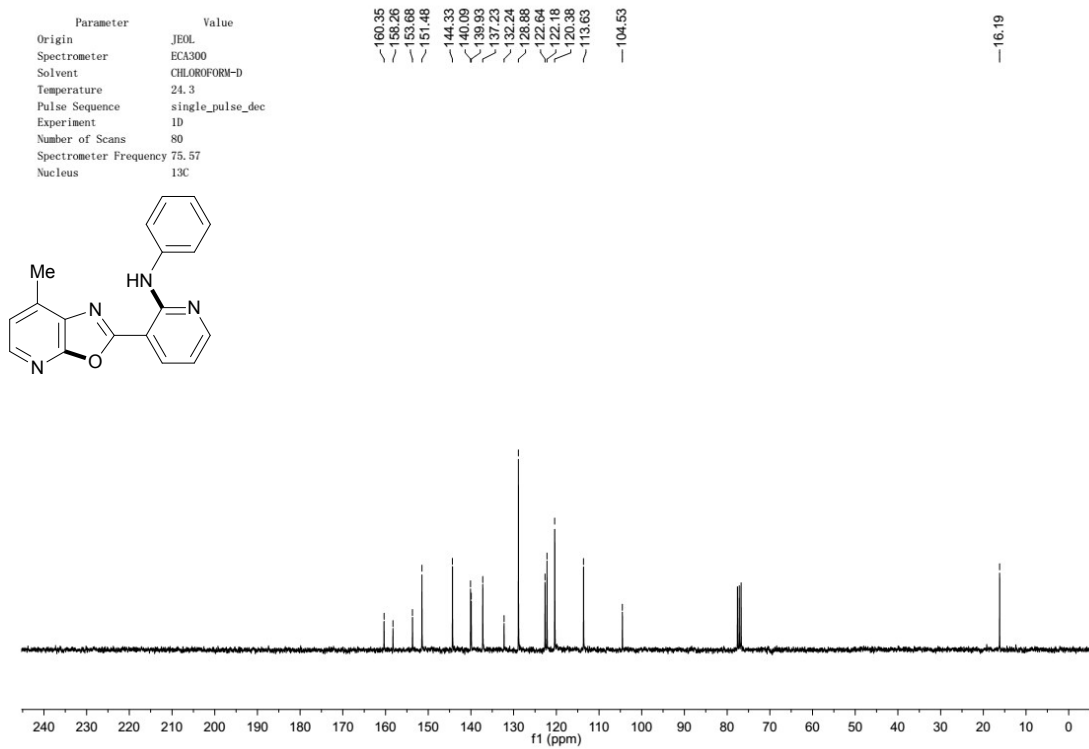

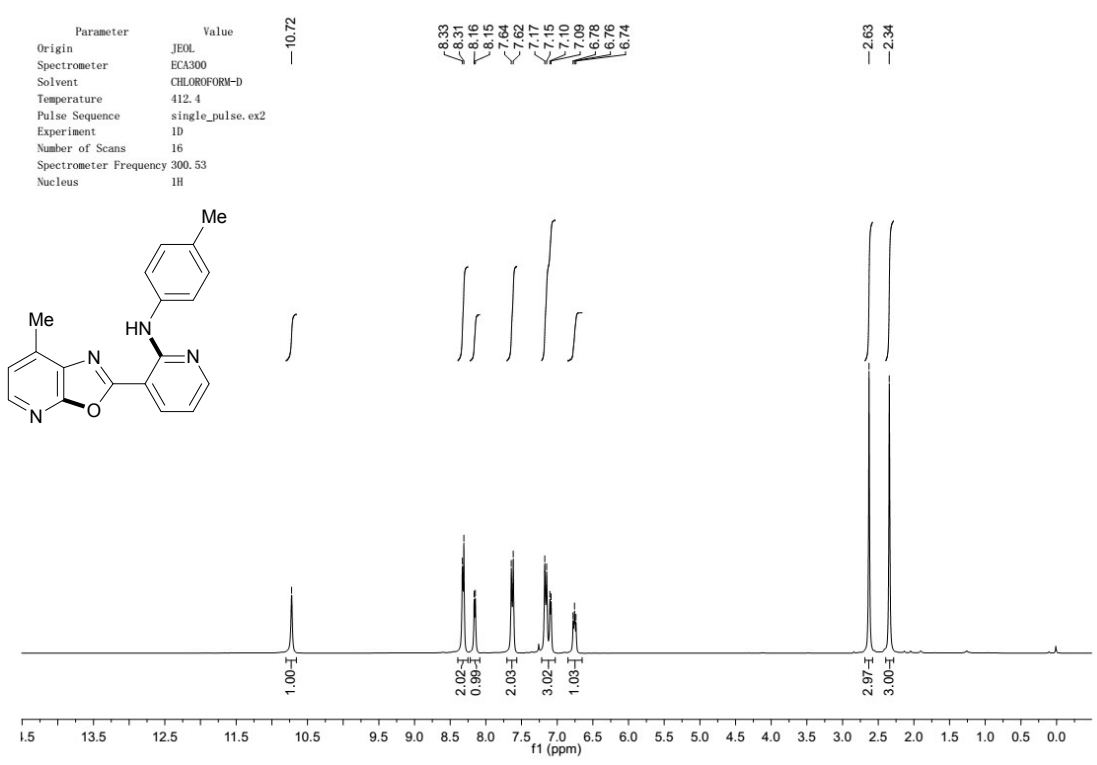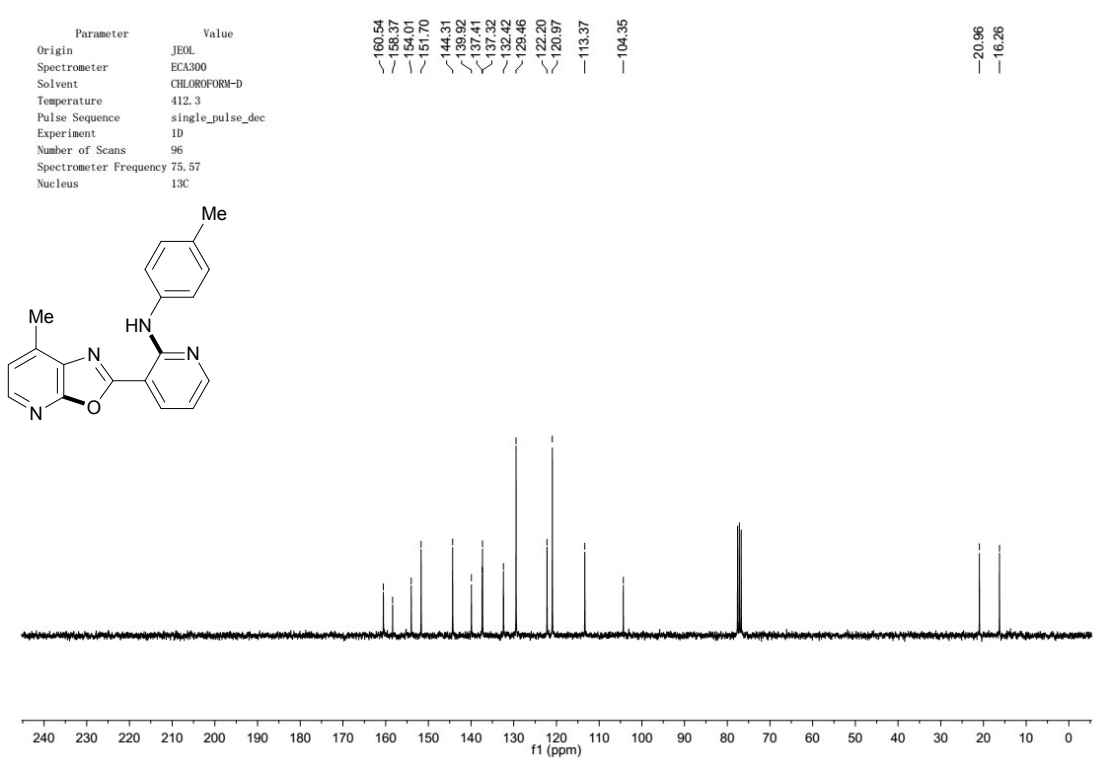

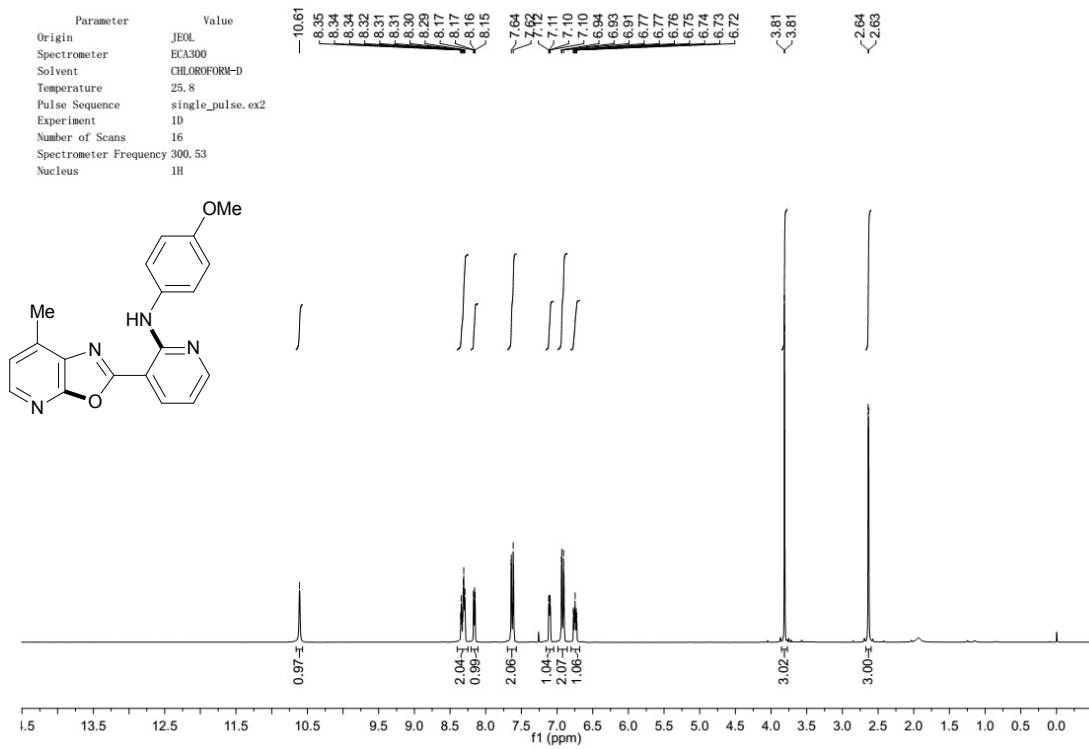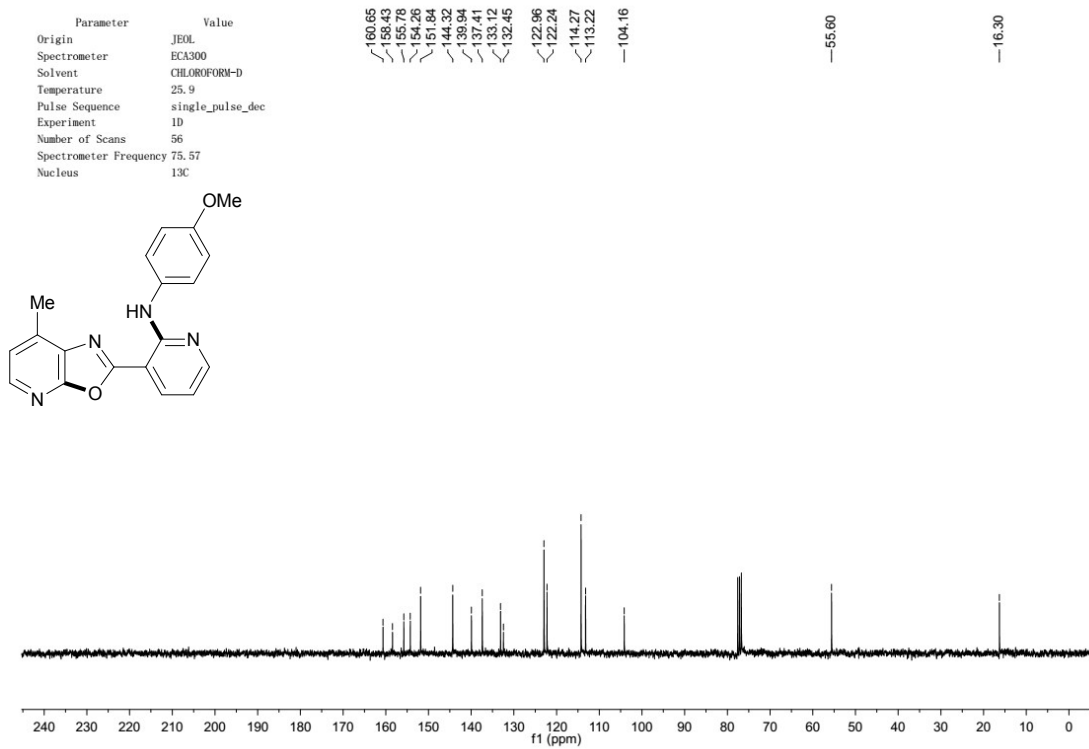



| Parameter              | Value            |
|------------------------|------------------|
| Origin                 | JEOL             |
| Spectrometer           | ECA300           |
| Solvent                | CHLOROFORM-D     |
| Temperature            | 414.3            |
| Pulse Sequence         | single_pulse_ex2 |
| Experiment             | 1D               |
| Number of Scans        | 16               |
| Spectrometer Frequency | 300.53           |
| Nucleus                | 1H               |

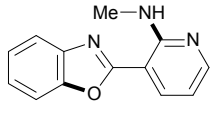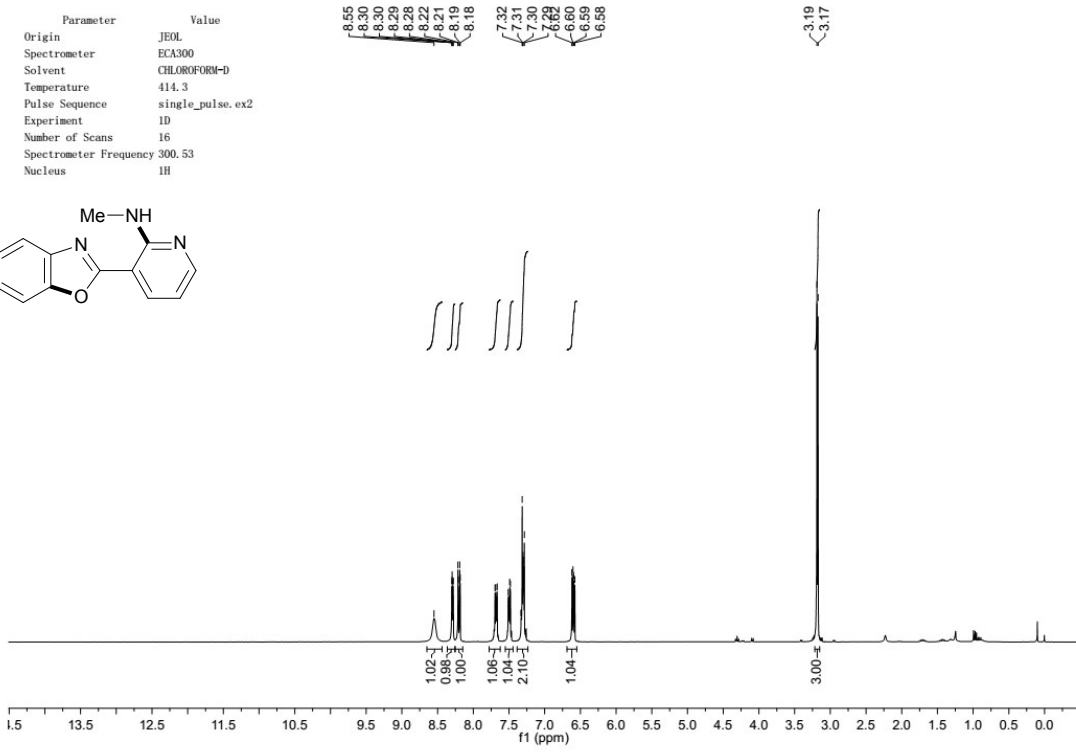

| Parameter              | Value            |
|------------------------|------------------|
| Origin                 | JEOL             |
| Spectrometer           | ECA300           |
| Solvent                | CHLOROFORM-D     |
| Temperature            | 414.3            |
| Pulse Sequence         | single_pulse_dec |
| Experiment             | 1D               |
| Number of Scans        | 136              |
| Spectrometer Frequency | 75.57            |
| Nucleus                | 13C              |

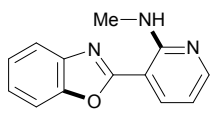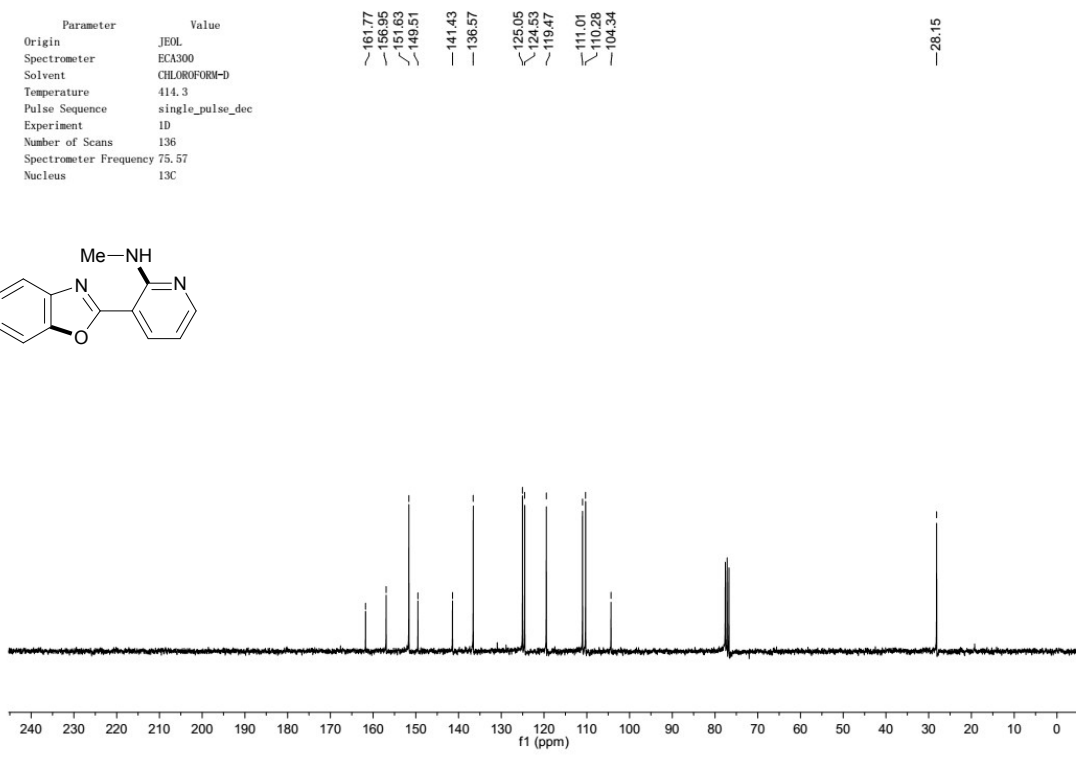

Parameter Value  
 Origin JEOL  
 Spectrometer ECA300  
 Solvent CHLOROFORM-D  
 Temperature 413.3  
 Pulse Sequence single\_pulse.ex2  
 Experiment 1D  
 Number of Scans 16  
 Spectrometer Frequency 300.53  
 Nucleus 1H

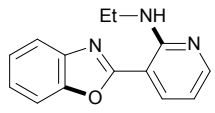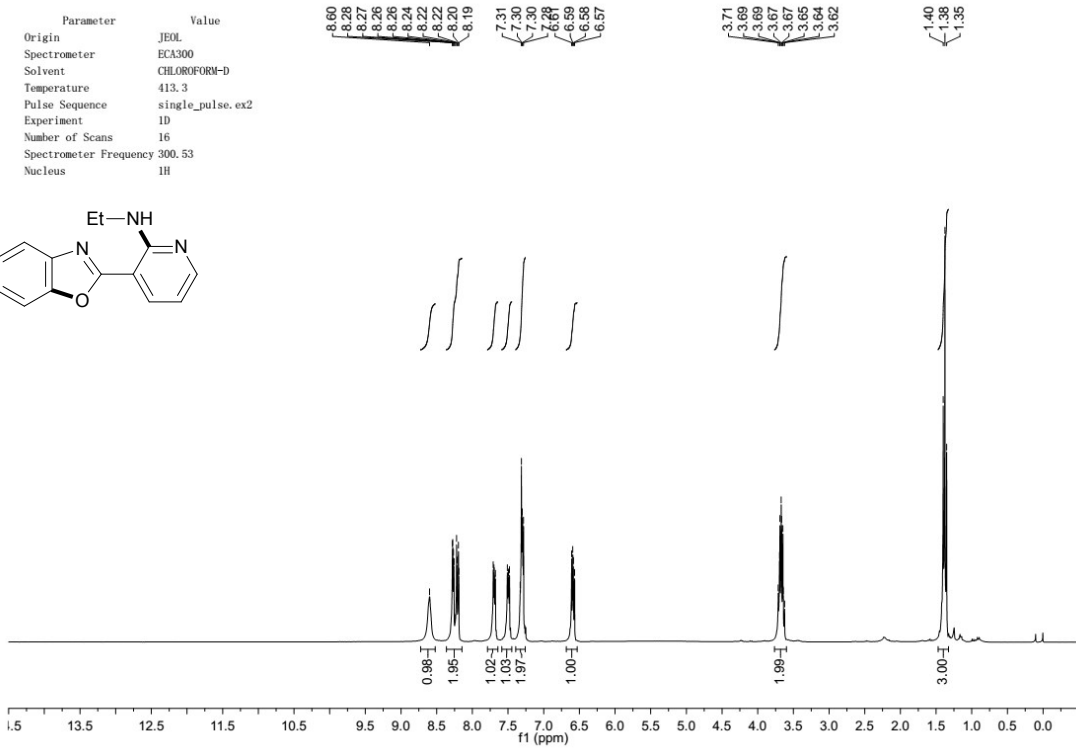

Parameter Value  
 Origin JEOL  
 Spectrometer ECA300  
 Solvent CHLOROFORM-D  
 Temperature 413.3  
 Pulse Sequence single\_pulse\_dec  
 Experiment 1D  
 Number of Scans 136  
 Spectrometer Frequency 75.57  
 Nucleus 13C

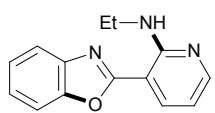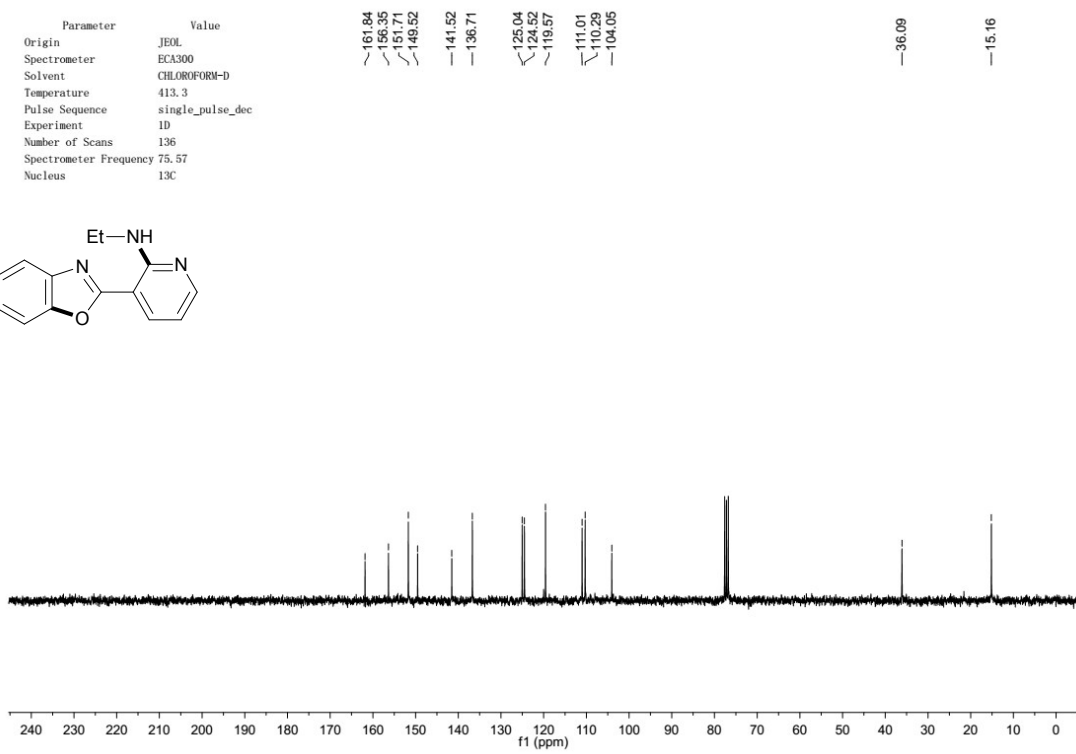

| Parameter              | Value            |
|------------------------|------------------|
| Origin                 | JEOL             |
| Spectrometer           | ECA300           |
| Solvent                | CHLOROFORM-D     |
| Temperature            | 415.8            |
| Pulse Sequence         | single_pulse.ex2 |
| Experiment             | 1D               |
| Number of Scans        | 16               |
| Spectrometer Frequency | 300.53           |
| Nucleus                | 1H               |

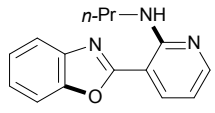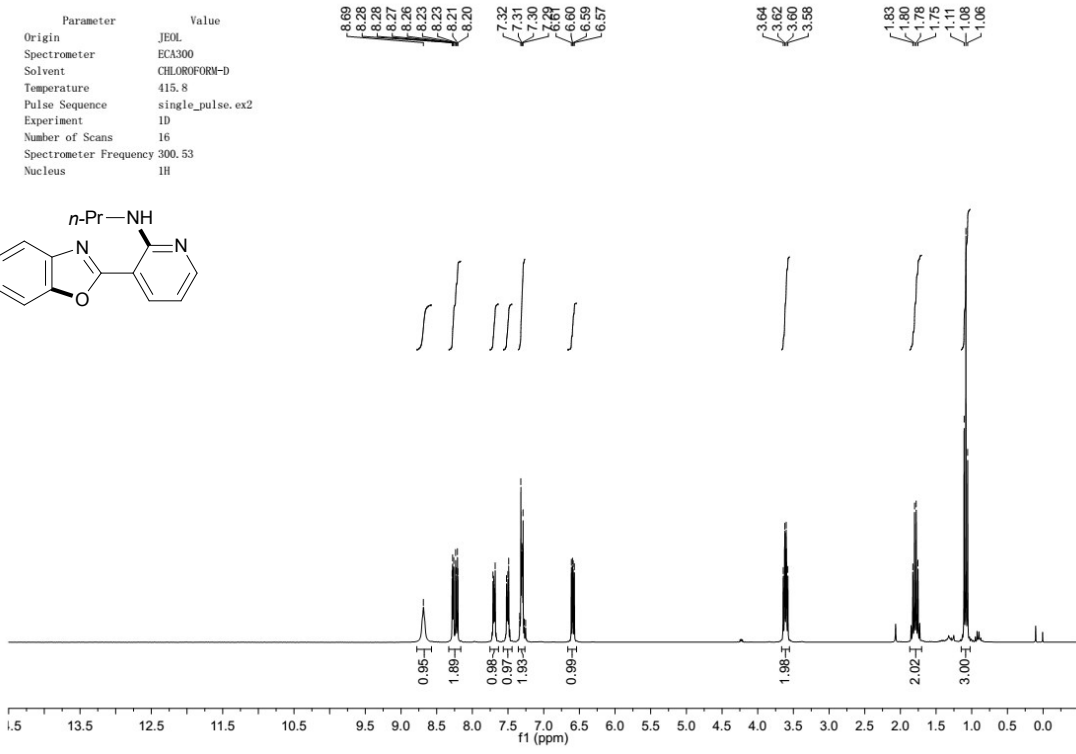

| Parameter              | Value            |
|------------------------|------------------|
| Origin                 | JEOL             |
| Spectrometer           | ECA300           |
| Solvent                | CHLOROFORM-D     |
| Temperature            | 415.8            |
| Pulse Sequence         | single_pulse_dec |
| Experiment             | 1D               |
| Number of Scans        | 160              |
| Spectrometer Frequency | 75.57            |
| Nucleus                | 13C              |

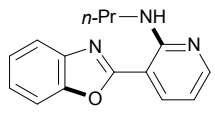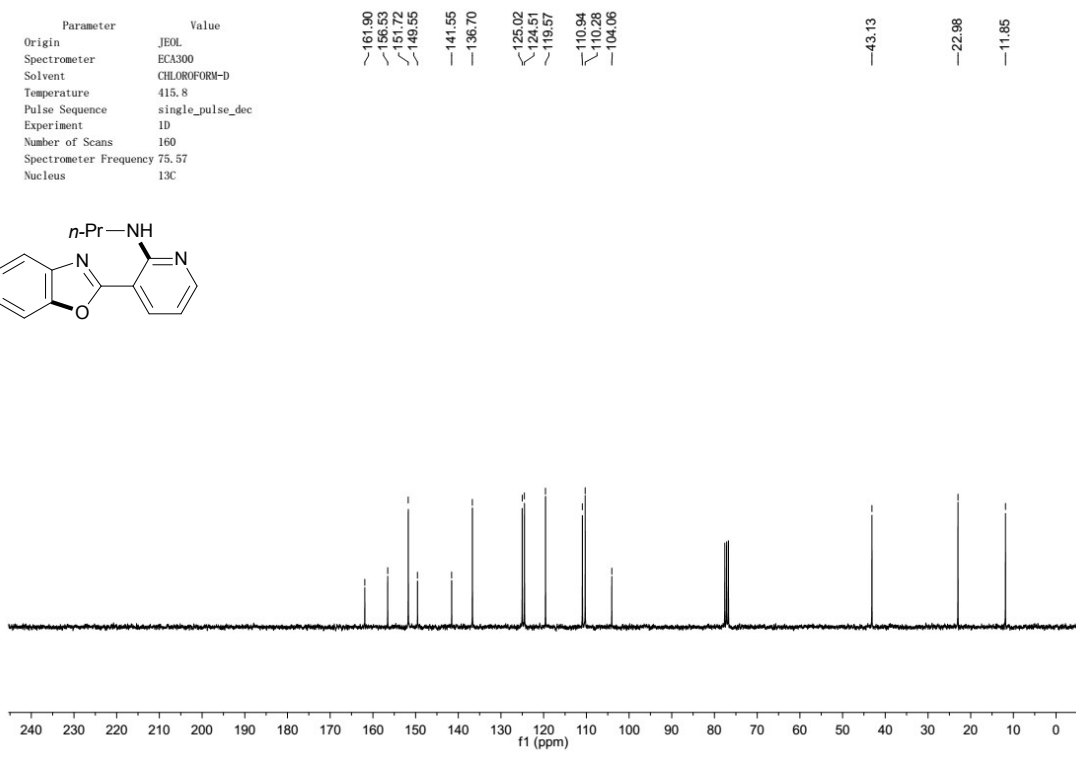

Parameter Value  
 Origin JEOL  
 Spectrometer ECA300  
 Solvent CHLOROFORM-D  
 Temperature 414.9  
 Pulse Sequence single\_pulse.ex2  
 Experiment 1D  
 Number of Scans 16  
 Spectrometer Frequency 300.53  
 Nucleus 1H

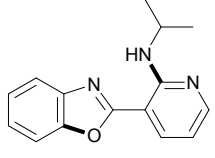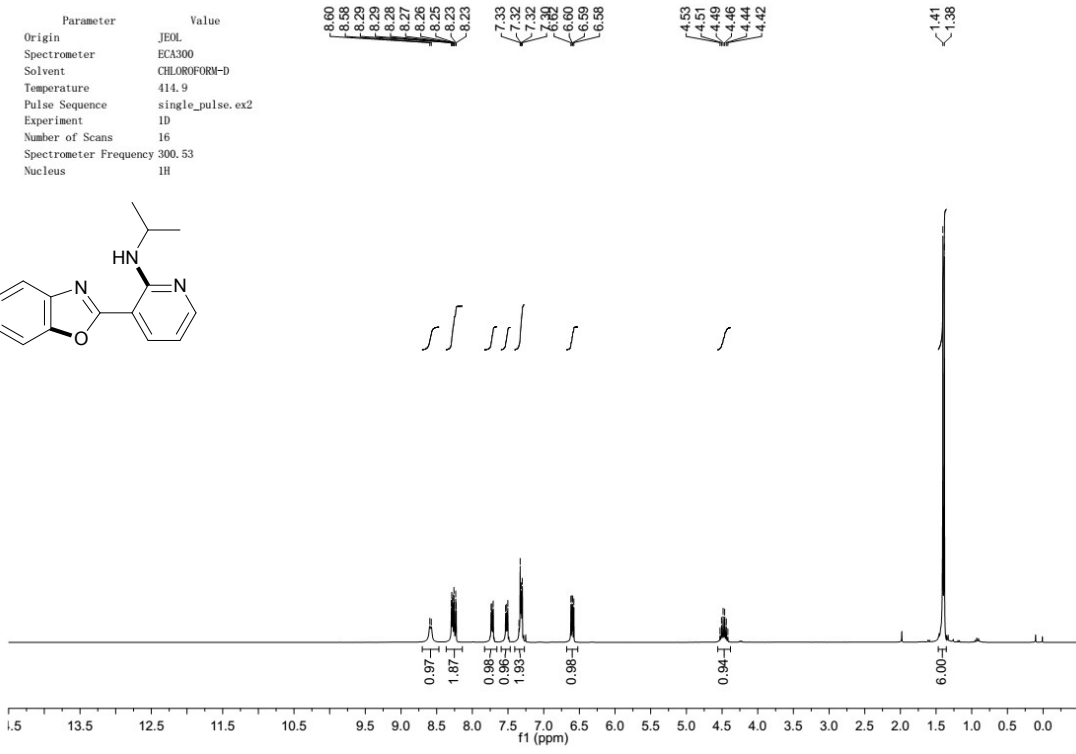

Parameter Value  
 Origin JEOL  
 Spectrometer ECA300  
 Solvent CHLOROFORM-D  
 Temperature 414.9  
 Pulse Sequence single\_pulse\_dec  
 Experiment 1D  
 Number of Scans 112  
 Spectrometer Frequency 75.57  
 Nucleus 13C

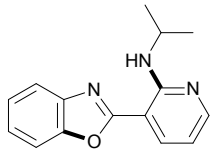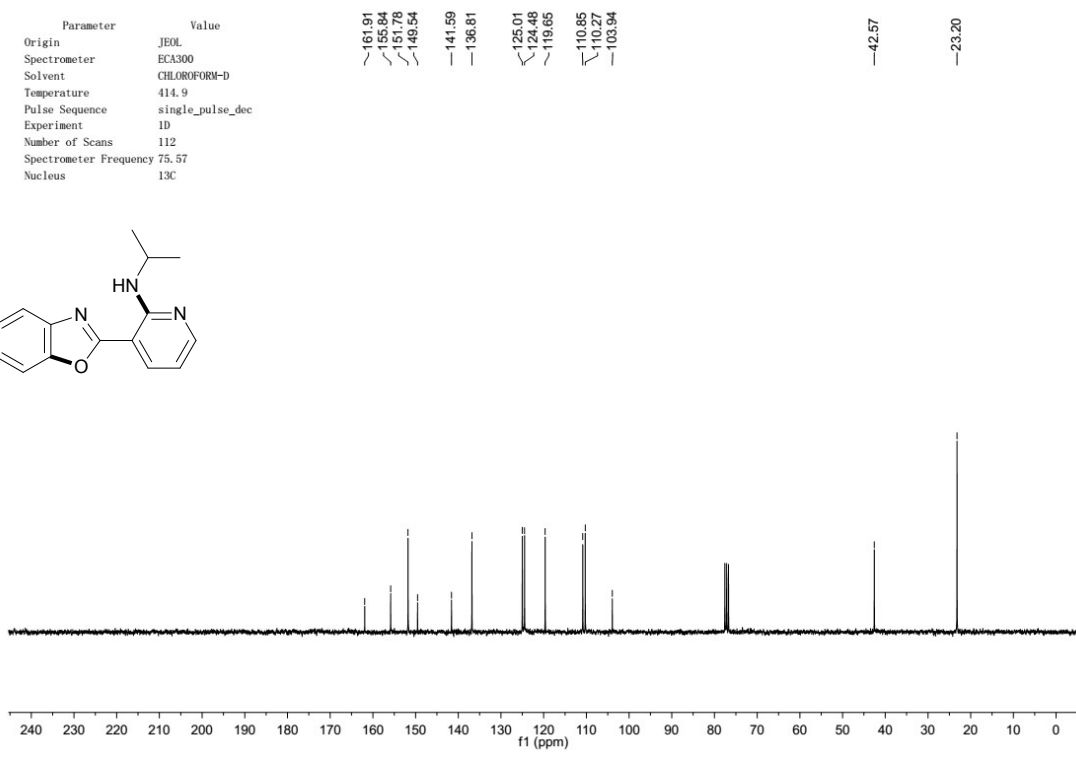

| Parameter              | Value            |
|------------------------|------------------|
| Origin                 | JEOL             |
| Spectrometer           | ECA300           |
| Solvent                | CHLOROFORM-D     |
| Temperature            | 26.9             |
| Pulse Sequence         | single_pulse_ex2 |
| Experiment             | 1D               |
| Number of Scans        | 16               |
| Spectrometer Frequency | 300.53           |
| Nucleus                | 1H               |

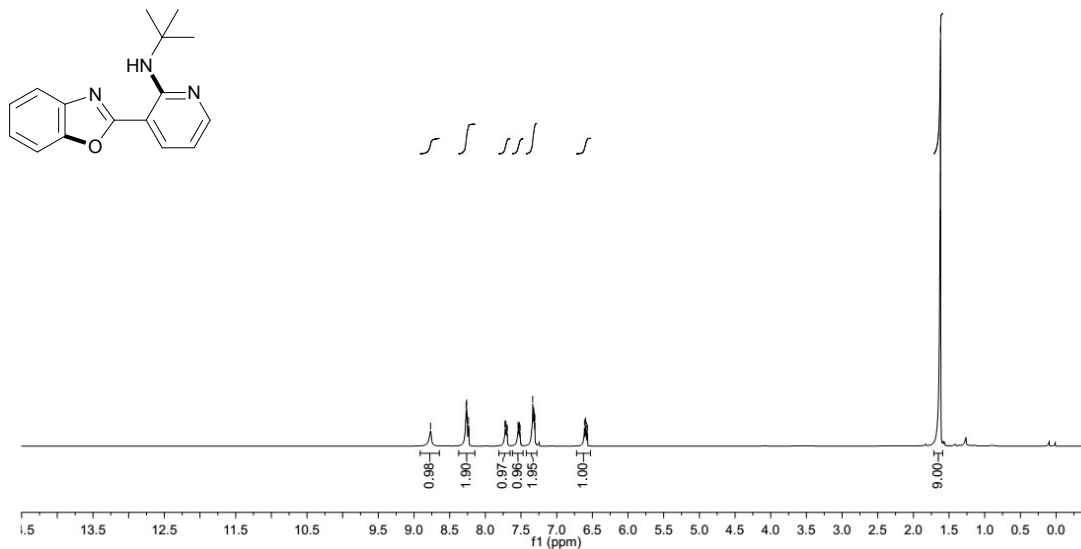

| Parameter              | Value            |
|------------------------|------------------|
| Origin                 | JEOL             |
| Spectrometer           | ECA300           |
| Solvent                | CHLOROFORM-D     |
| Temperature            | 27.0             |
| Pulse Sequence         | single_pulse_dec |
| Experiment             | 1D               |
| Number of Scans        | 128              |
| Spectrometer Frequency | 75.57            |
| Nucleus                | 13C              |

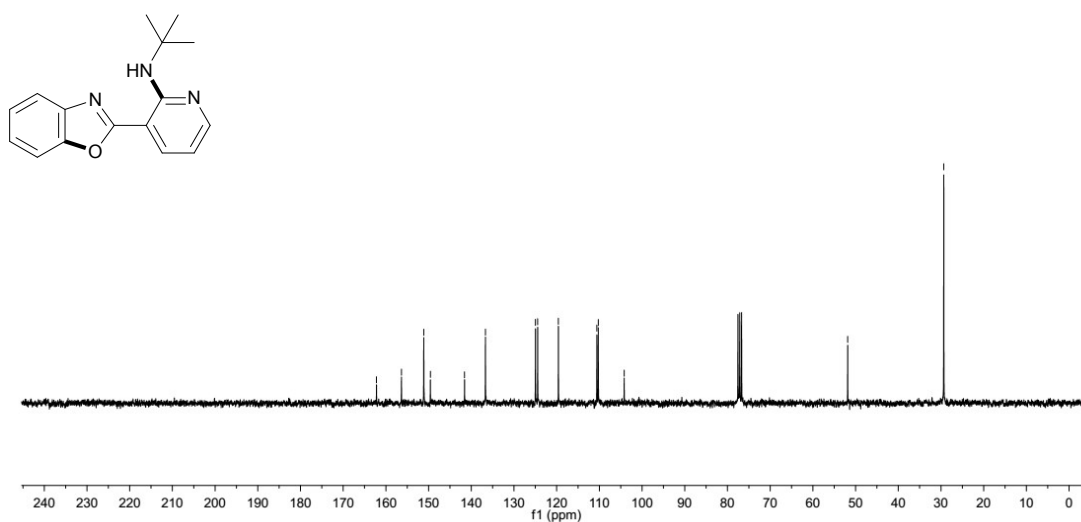

Parameter Value  
 Origin JEOL  
 Spectrometer ECA300  
 Solvent CHLOROFORM-D  
 Temperature 414.3  
 Pulse Sequence single\_pulse.ex2  
 Experiment 1D  
 Number of Scans 16  
 Spectrometer Frequency 300.53  
 Nucleus 1H

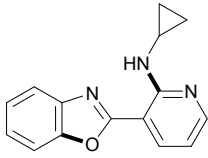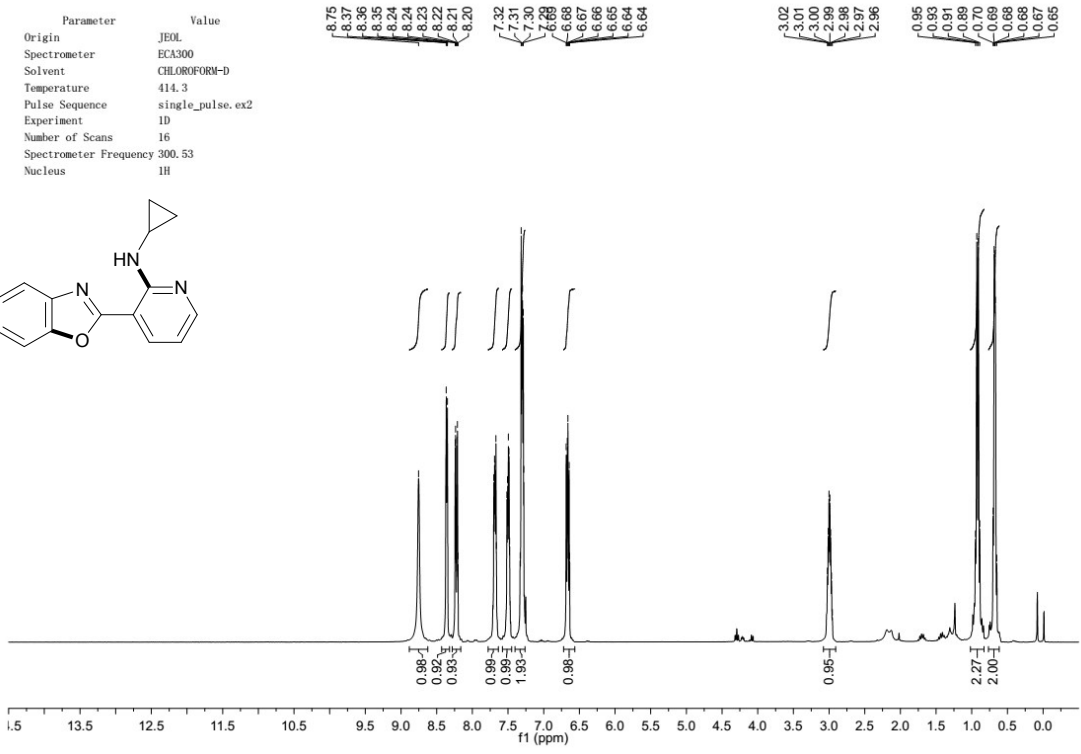

Parameter Value  
 Origin JEOL  
 Spectrometer ECA300  
 Solvent CHLOROFORM-D  
 Temperature 414.3  
 Pulse Sequence single\_pulse\_dec  
 Experiment 1D  
 Number of Scans 88  
 Spectrometer Frequency 75.57  
 Nucleus 13C

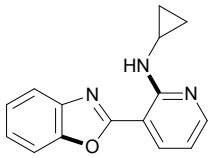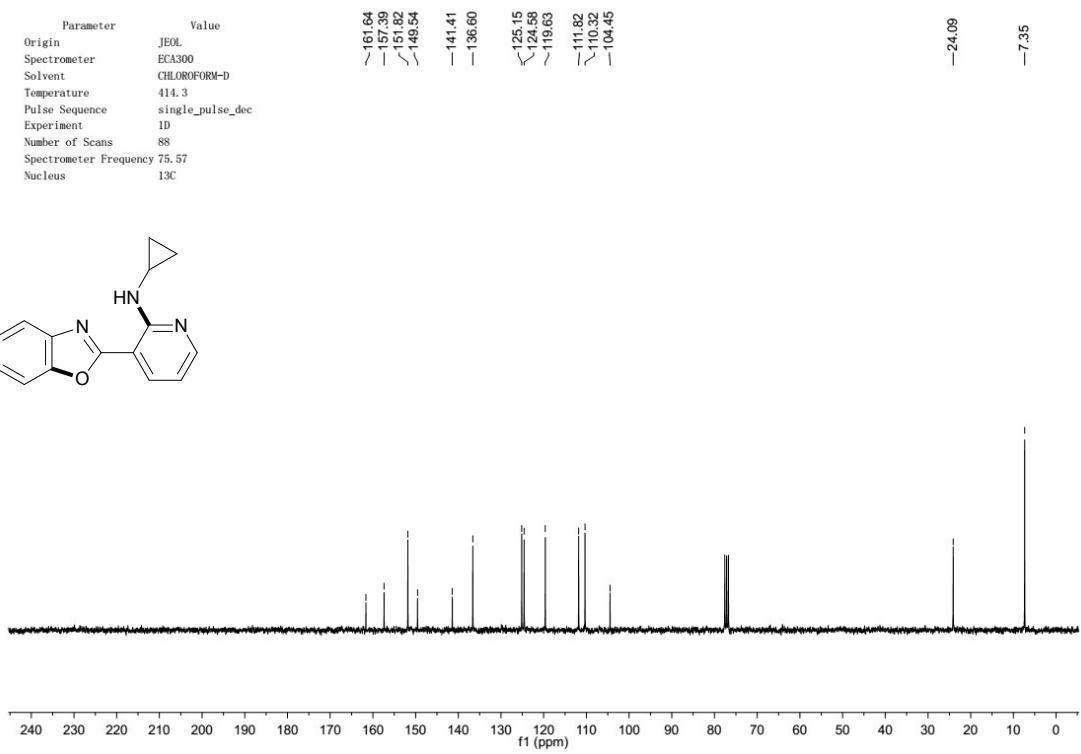

Parameter Value  
 Origin JEOL  
 Spectrometer ECA300  
 Solvent CHLOROFORM-D  
 Temperature 26.8  
 Pulse Sequence single\_pulse.ex2  
 Experiment 1D  
 Number of Scans 16  
 Spectrometer Frequency 300.53  
 Nucleus 1H

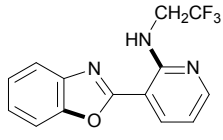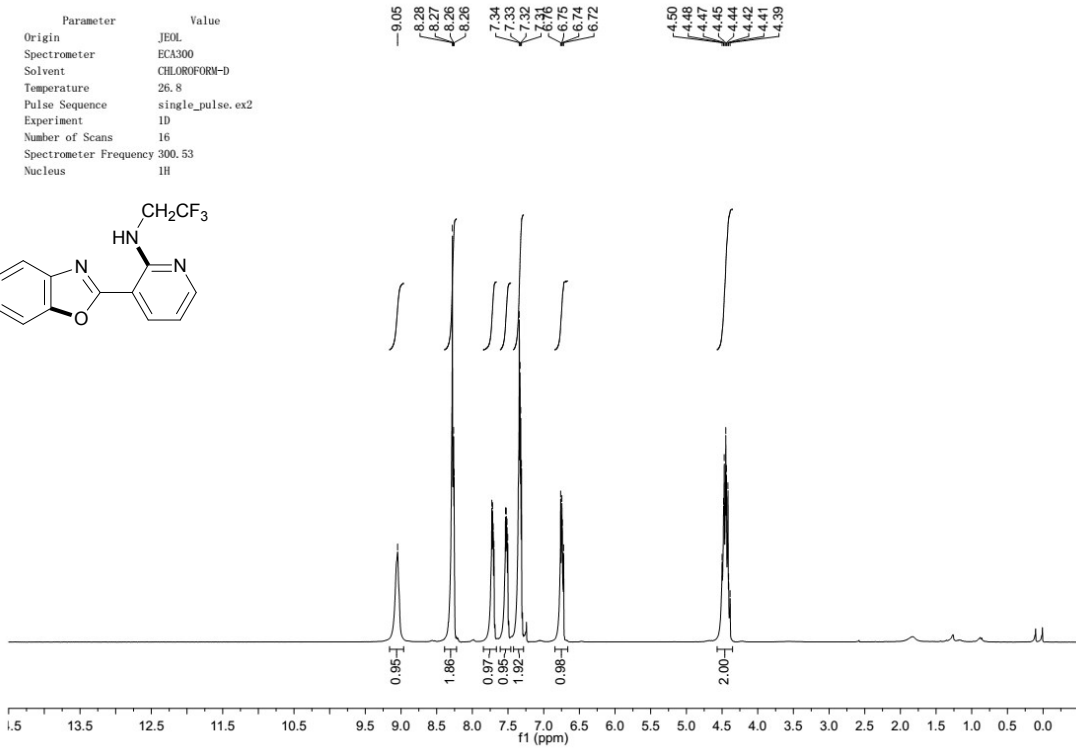

Parameter Value  
 Origin JEOL  
 Spectrometer ECA300  
 Solvent CHLOROFORM-D  
 Temperature 27.0  
 Pulse Sequence single\_pulse\_dec  
 Experiment 1D  
 Number of Scans 176  
 Spectrometer Frequency 75.57  
 Nucleus 13C

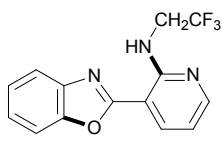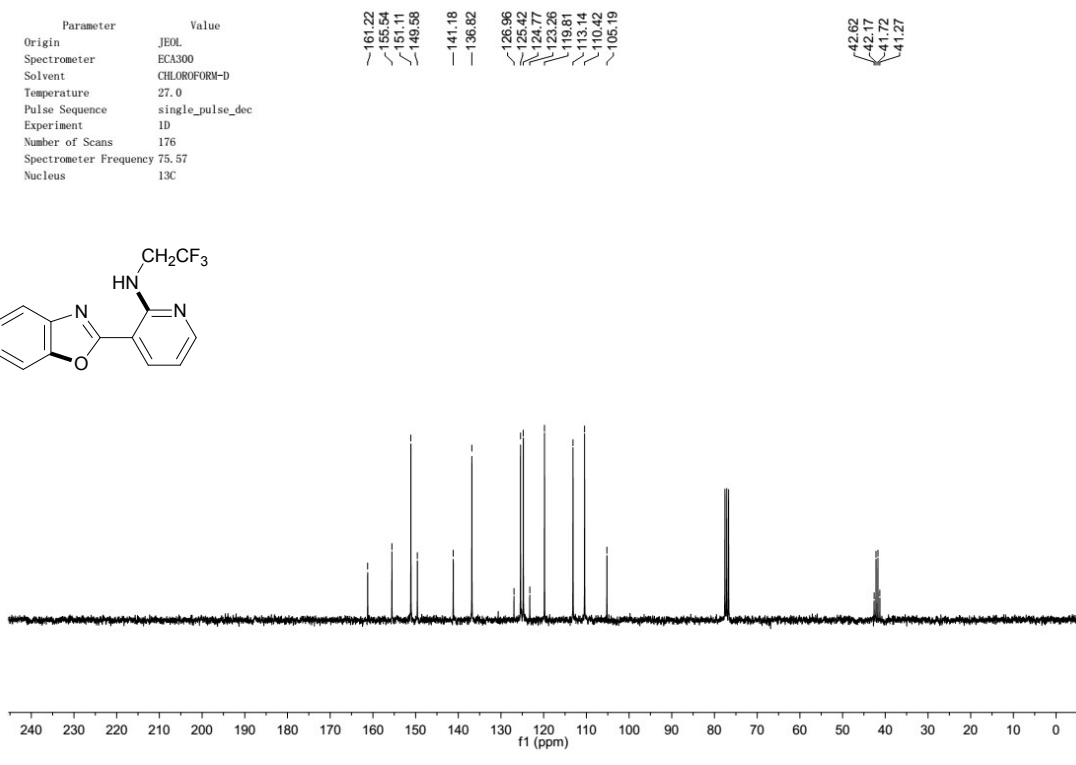

Parameter Value  
 Origin JEOL  
 Spectrometer ECA300  
 Solvent CHLOROFORM-D  
 Temperature 414.1  
 Pulse Sequence single\_pulse.ex2  
 Experiment 1D  
 Number of Scans 16  
 Spectrometer Frequency 300.53  
 Nucleus 1H

9.14  
 8.33  
 8.32  
 8.31  
 8.31  
 7.48  
 7.36  
 7.32  
 7.27  
 6.70  
 6.69  
 6.68  
 6.68  
 6.68  
 6.68  
 4.98  
 4.96

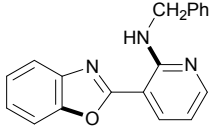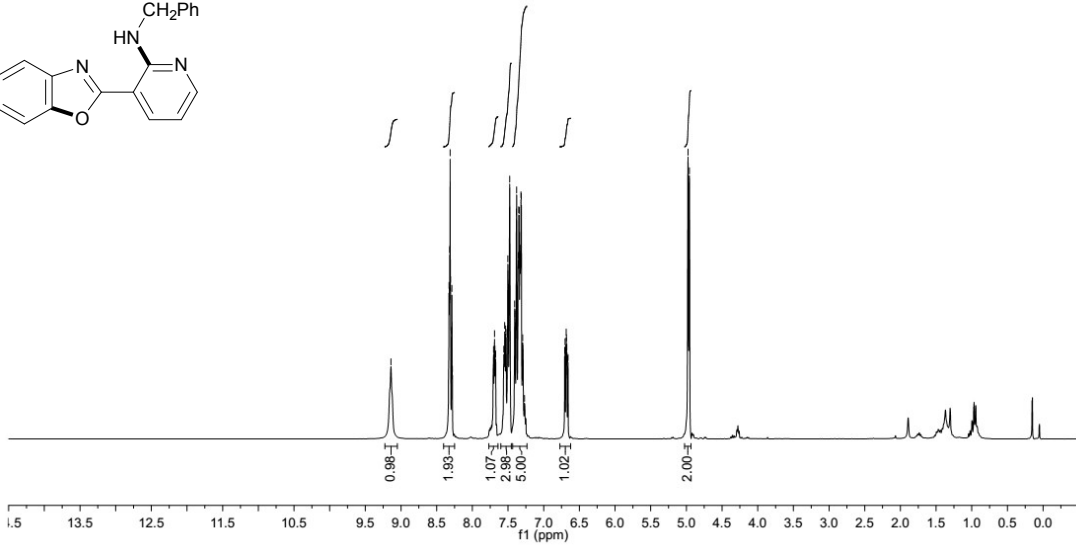

Parameter Value  
 Origin JEOL  
 Spectrometer ECA300  
 Solvent CHLOROFORM-D  
 Temperature 414.1  
 Pulse Sequence single\_pulse\_dec  
 Experiment 1D  
 Number of Scans 104  
 Spectrometer Frequency 75.57  
 Nucleus 13C

161.78  
 156.37  
 151.76  
 148.60  
 141.50  
 140.03  
 136.80  
 128.63  
 127.44  
 127.02  
 124.61  
 119.70  
 110.36  
 104.37

44.96

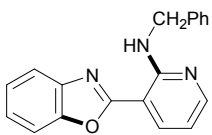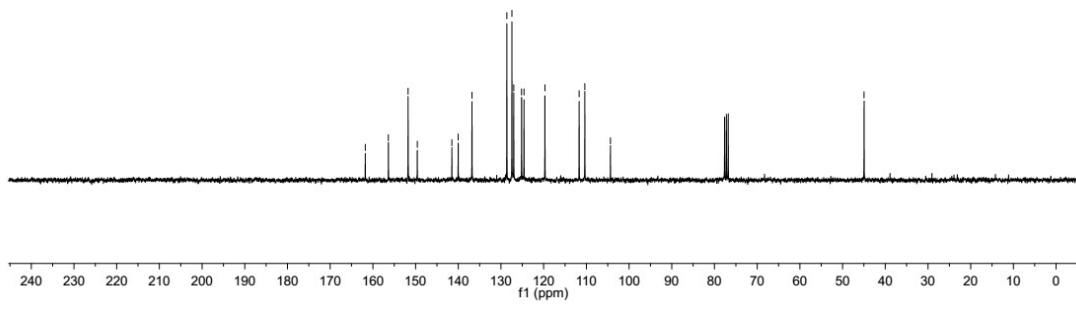



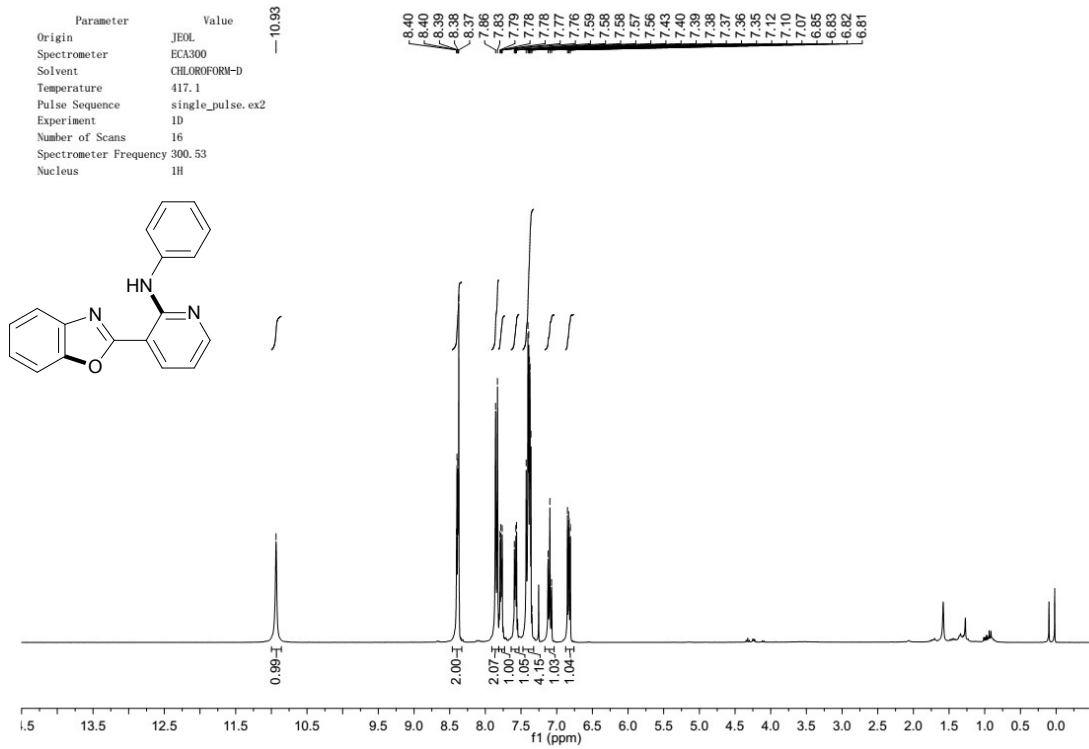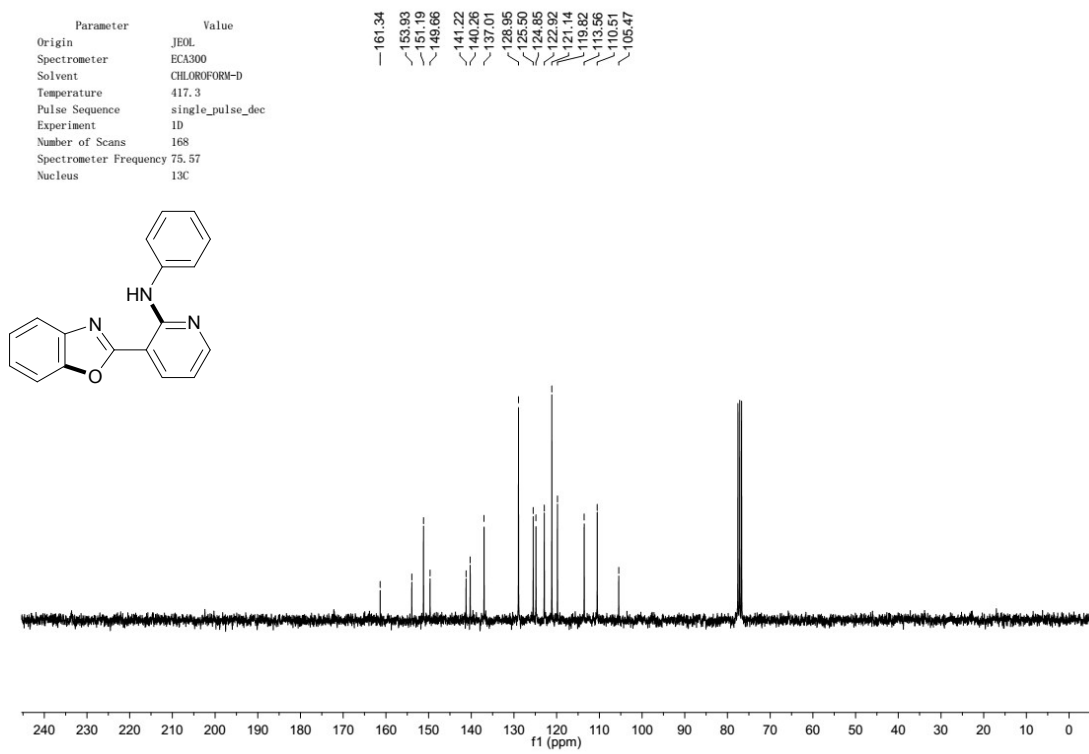

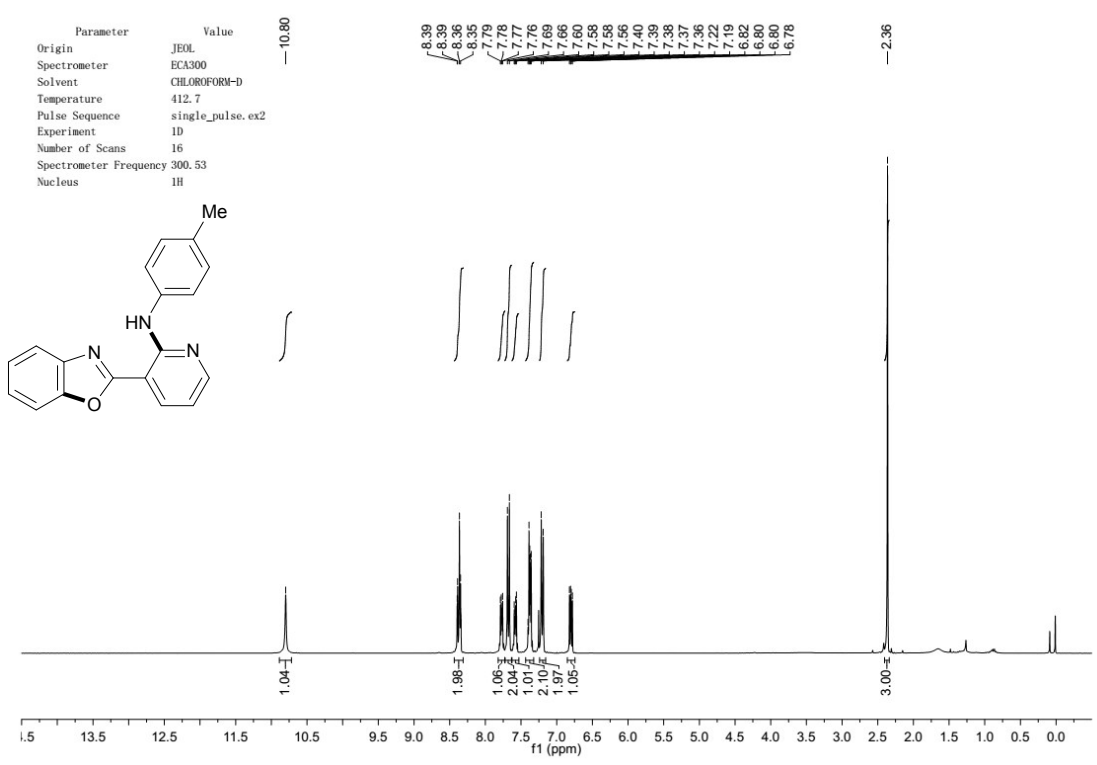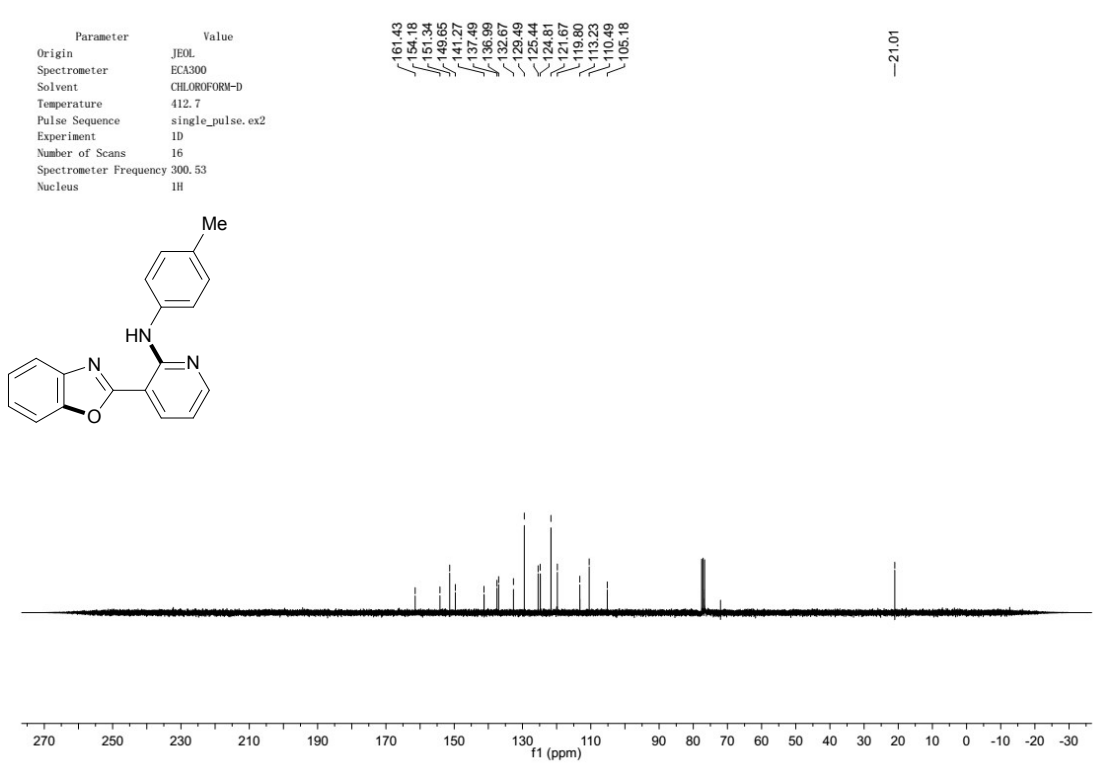

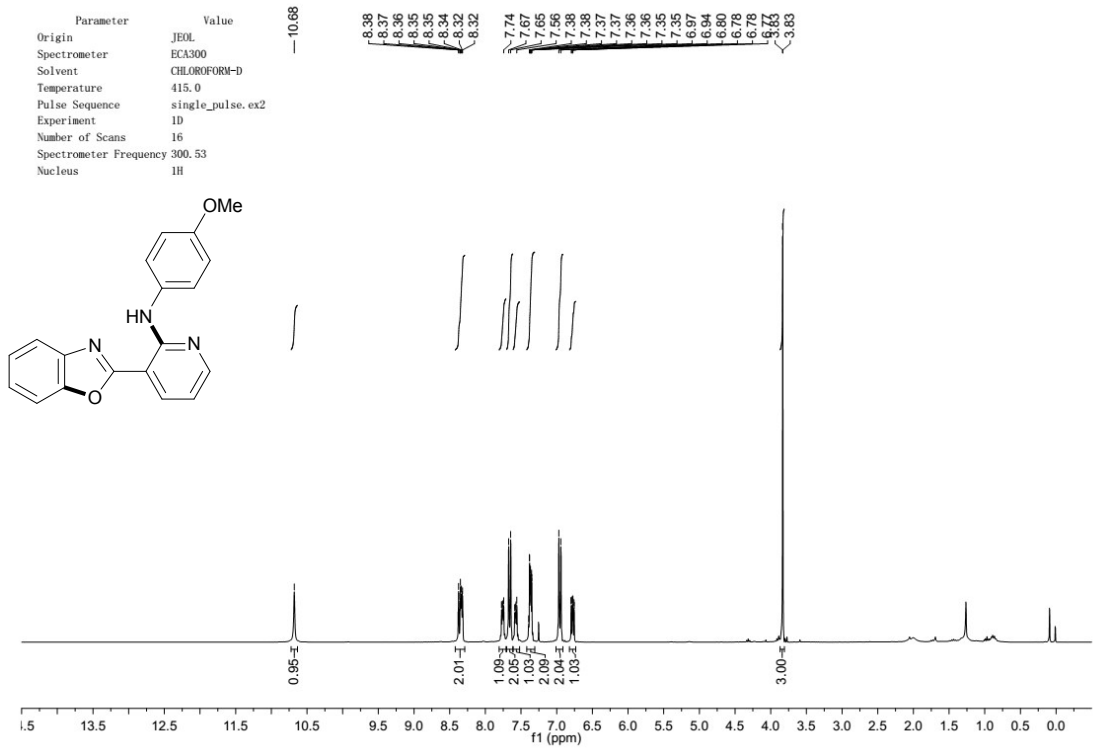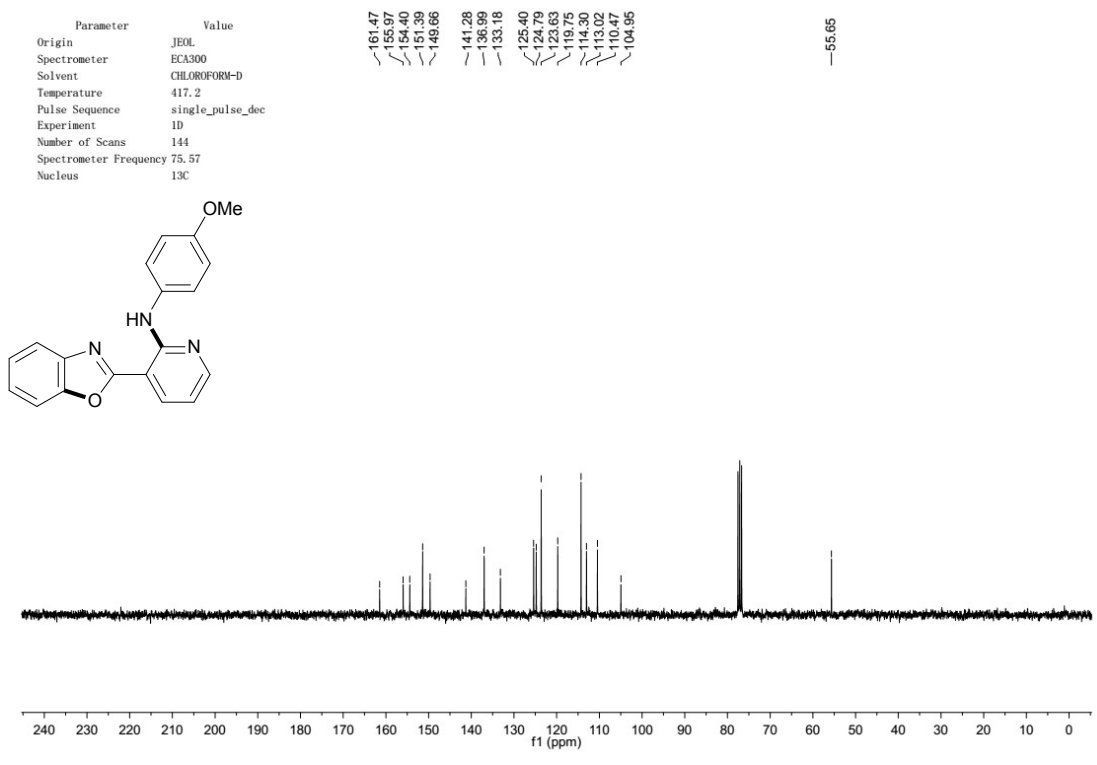

Parameter Value  
 Origin JEOL  
 Spectrometer ECA300  
 Solvent CHLOROFORM-D  
 Temperature 23.2  
 Pulse Sequence single\_pulse.ex2  
 Experiment 1D  
 Number of Scans 16  
 Spectrometer Frequency 300.53  
 Nucleus 1H

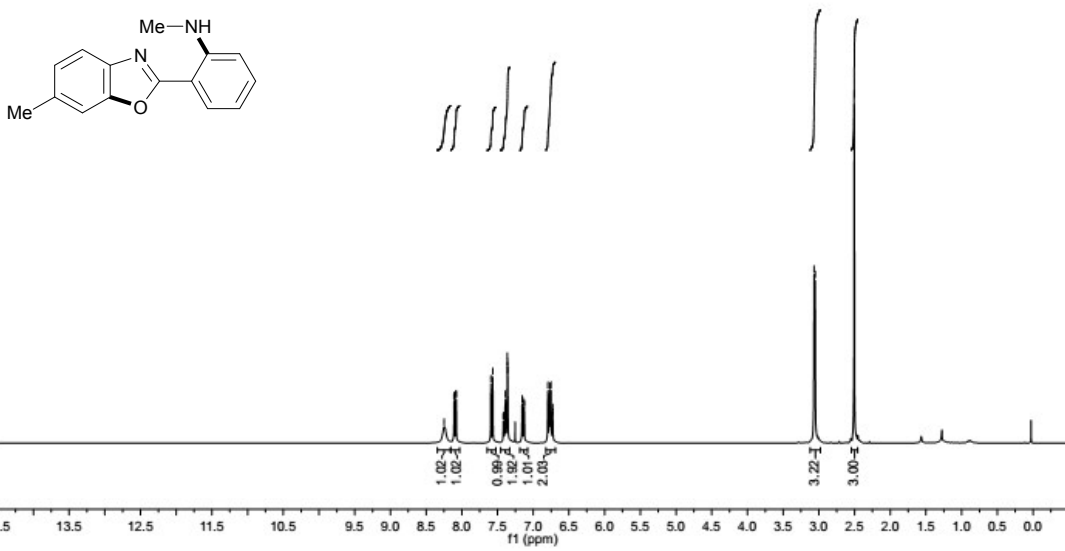

Parameter Value  
 Origin JEOL  
 Spectrometer ECA600  
 Solvent CHLOROFORM-D  
 Temperature 28.0  
 Pulse Sequence single\_pulse\_dec  
 Experiment 1D  
 Number of Scans 129  
 Spectrometer Frequency 150.91  
 Nucleus 13C

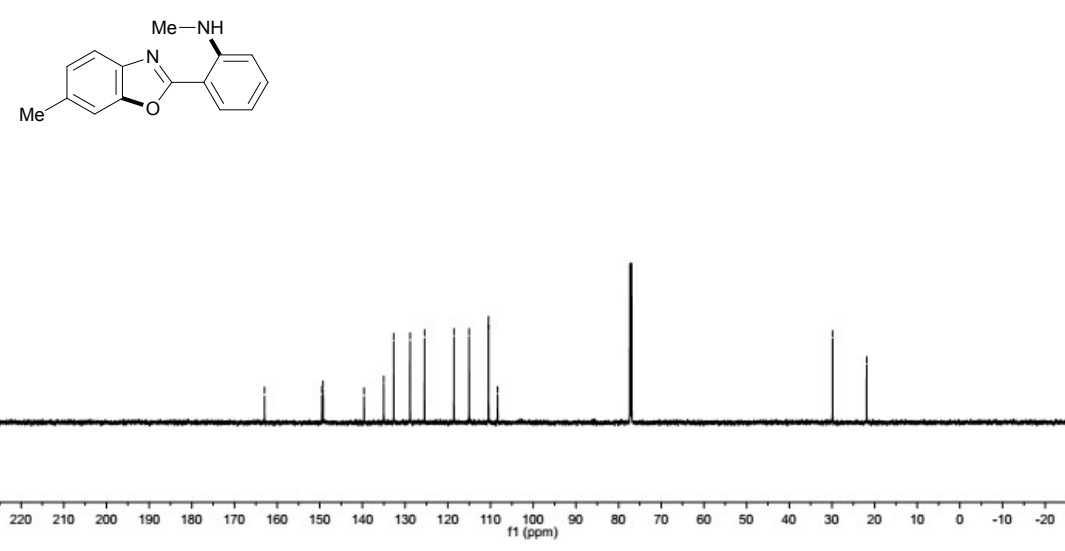

| Parameter              | Value            |
|------------------------|------------------|
| Origin                 | JEOL             |
| Spectrometer           | ECA300           |
| Solvent                | CHLOROFORM-D     |
| Temperature            | 412.4            |
| Pulse Sequence         | single_pulse.ex2 |
| Experiment             | 1D               |
| Number of Scans        | 16               |
| Spectrometer Frequency | 300.53           |
| Nucleus                | <sup>1</sup> H   |

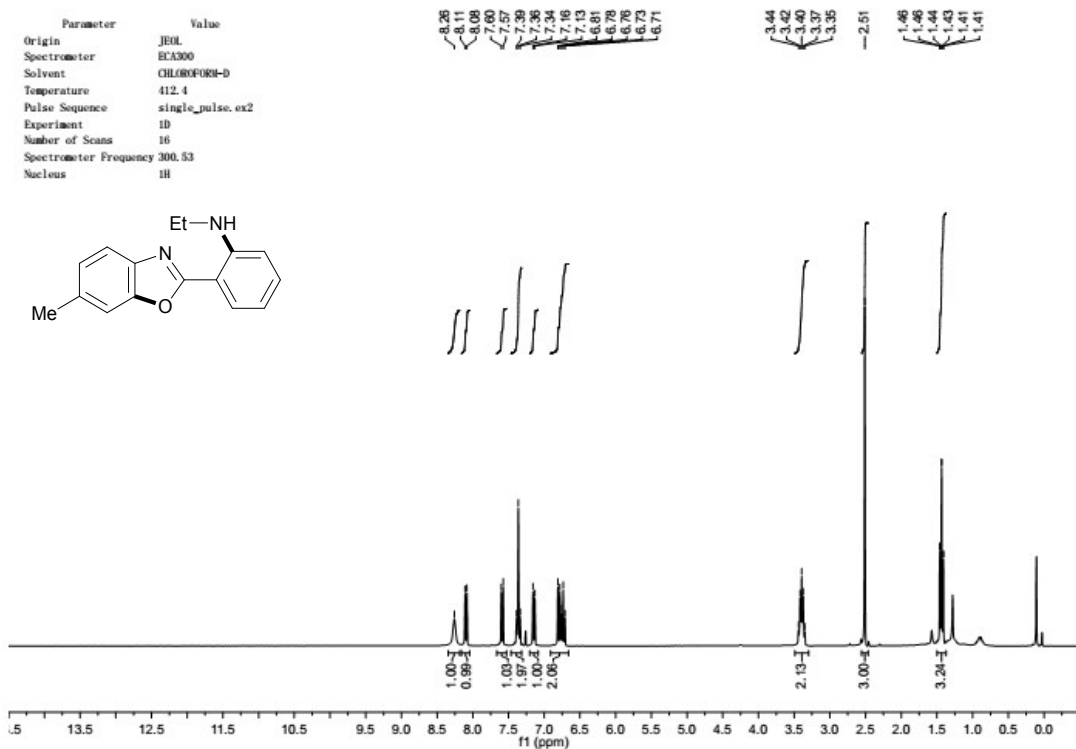

| Parameter              | Value            |
|------------------------|------------------|
| Origin                 | JEOL             |
| Spectrometer           | ECA300           |
| Solvent                | CHLOROFORM-D     |
| Temperature            | 413.6            |
| Pulse Sequence         | single_pulse_dec |
| Experiment             | 1D               |
| Number of Scans        | 176              |
| Spectrometer Frequency | 75.57            |
| Nucleus                | <sup>13</sup> C  |

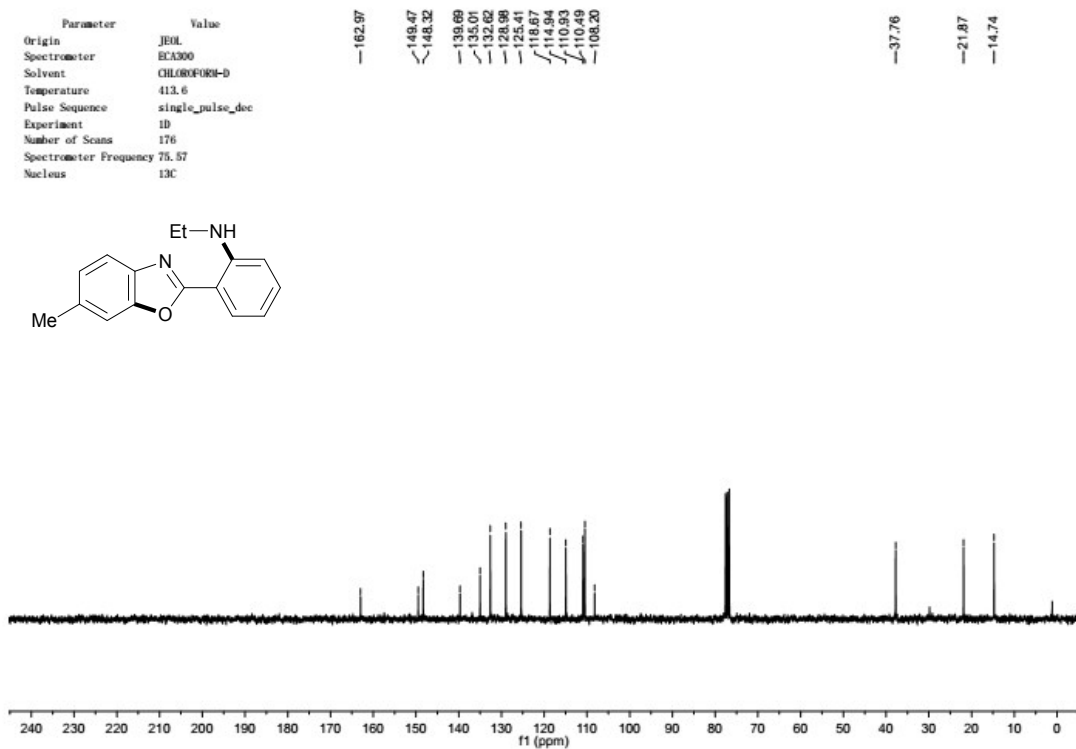

Parameter Value  
 Origin JEOL  
 Spectrometer EAM300  
 Solvent CHLOROFORM-D  
 Temperature 412.5  
 Pulse Sequence single\_pulse\_ex2  
 Experiment 1D  
 Number of Scans 16  
 Spectrometer Frequency 300.53  
 Nucleus 1H

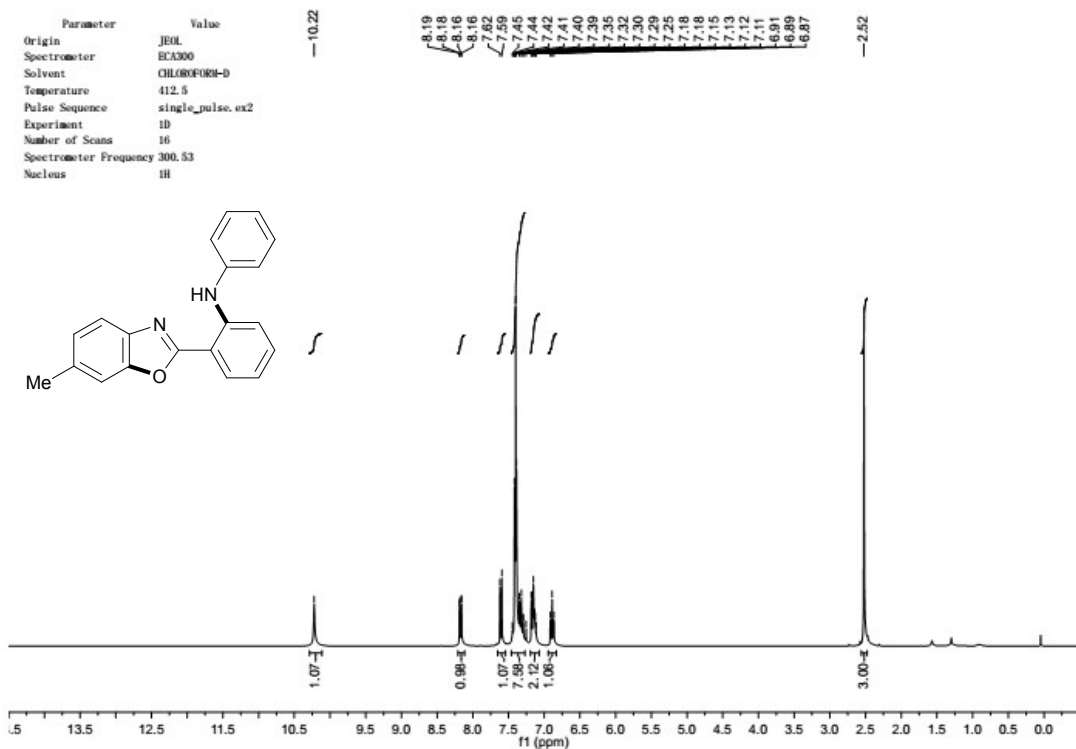

Parameter Value  
 Origin JEOL  
 Spectrometer EAM600  
 Solvent CHLOROFORM-D  
 Temperature 28.1  
 Pulse Sequence single\_pulse\_dec  
 Experiment 1D  
 Number of Scans 82  
 Spectrometer Frequency 150.91  
 Nucleus 13C

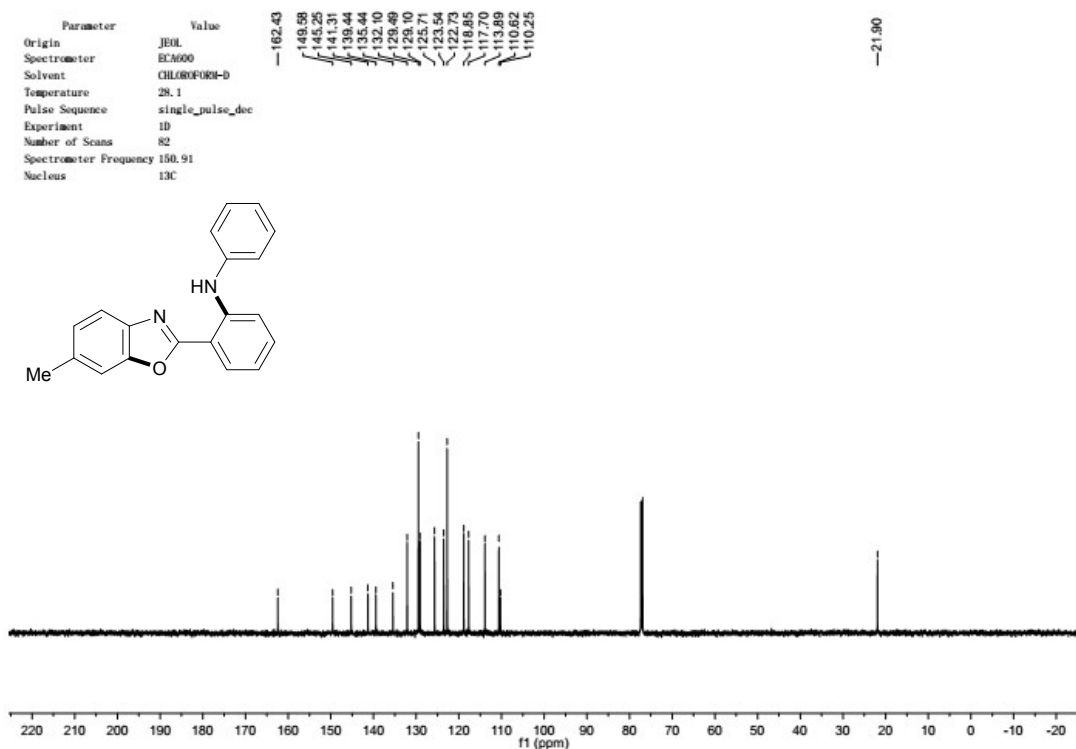

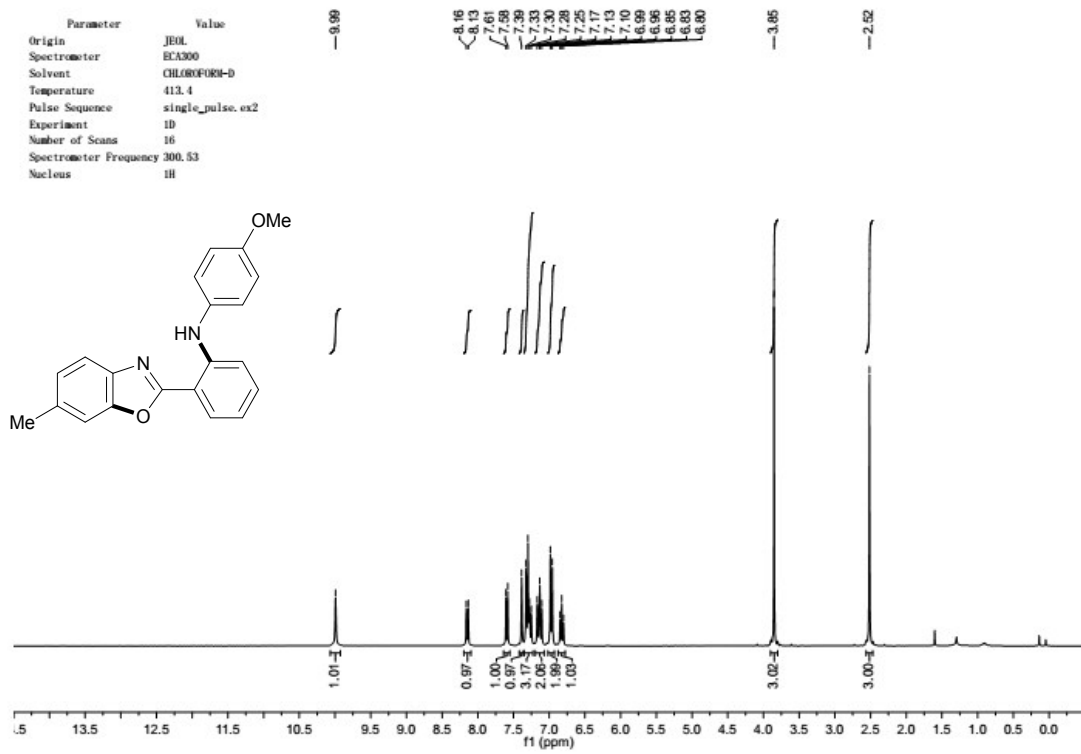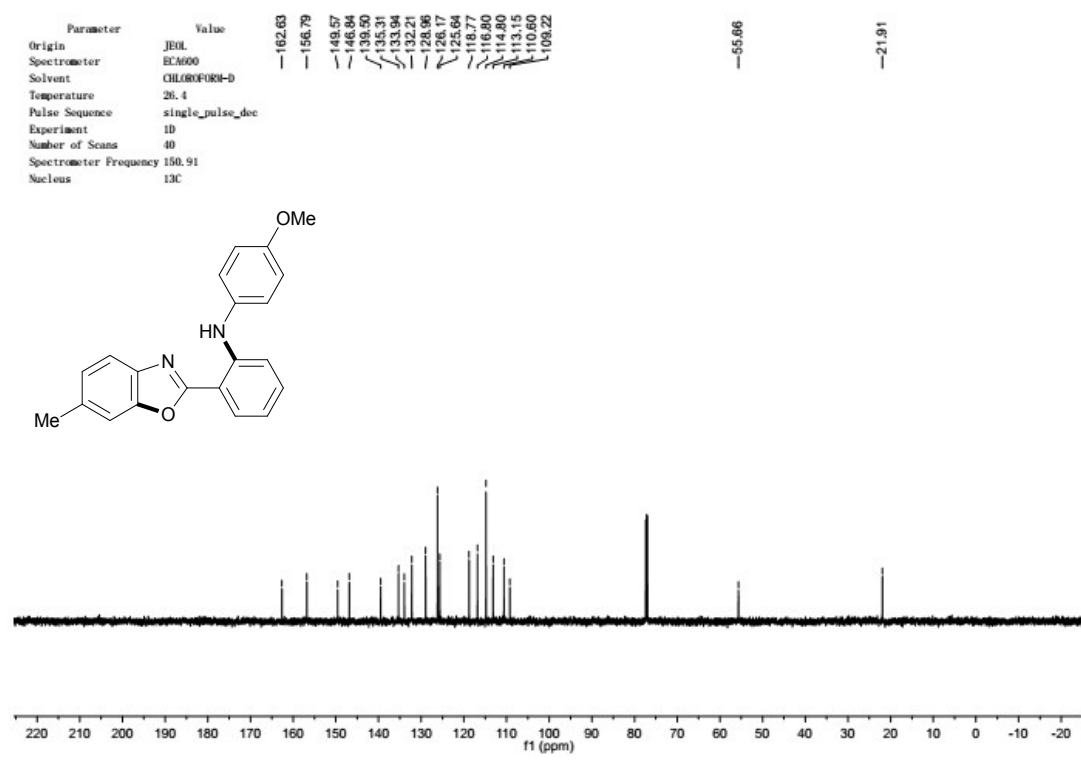

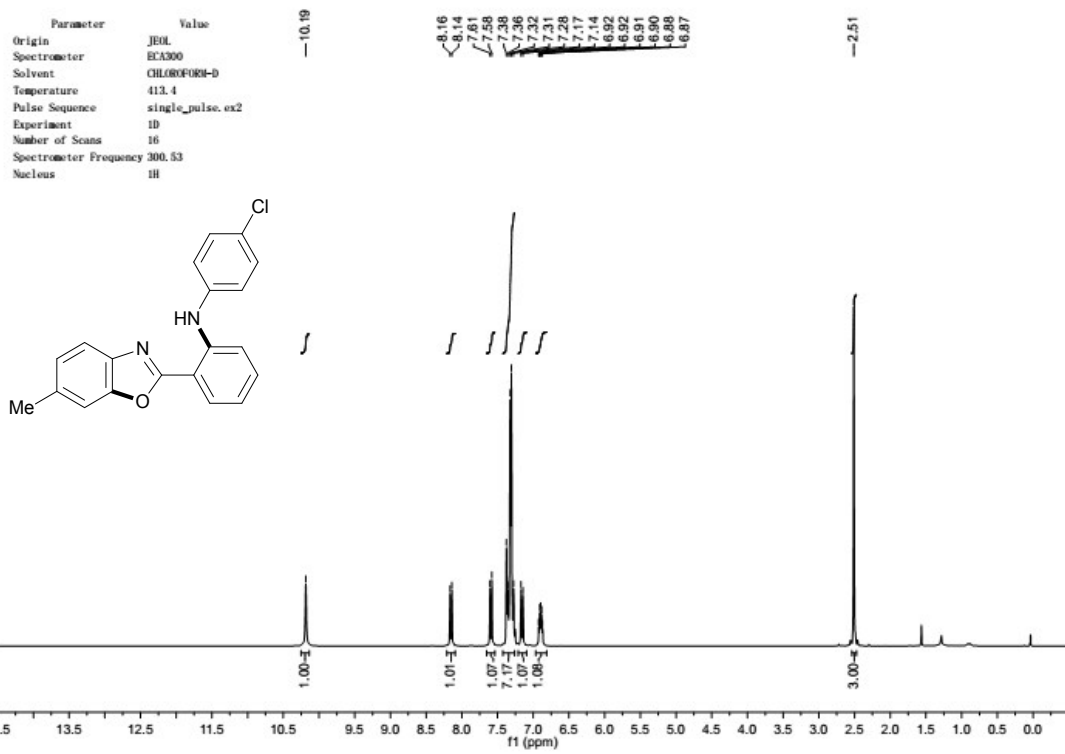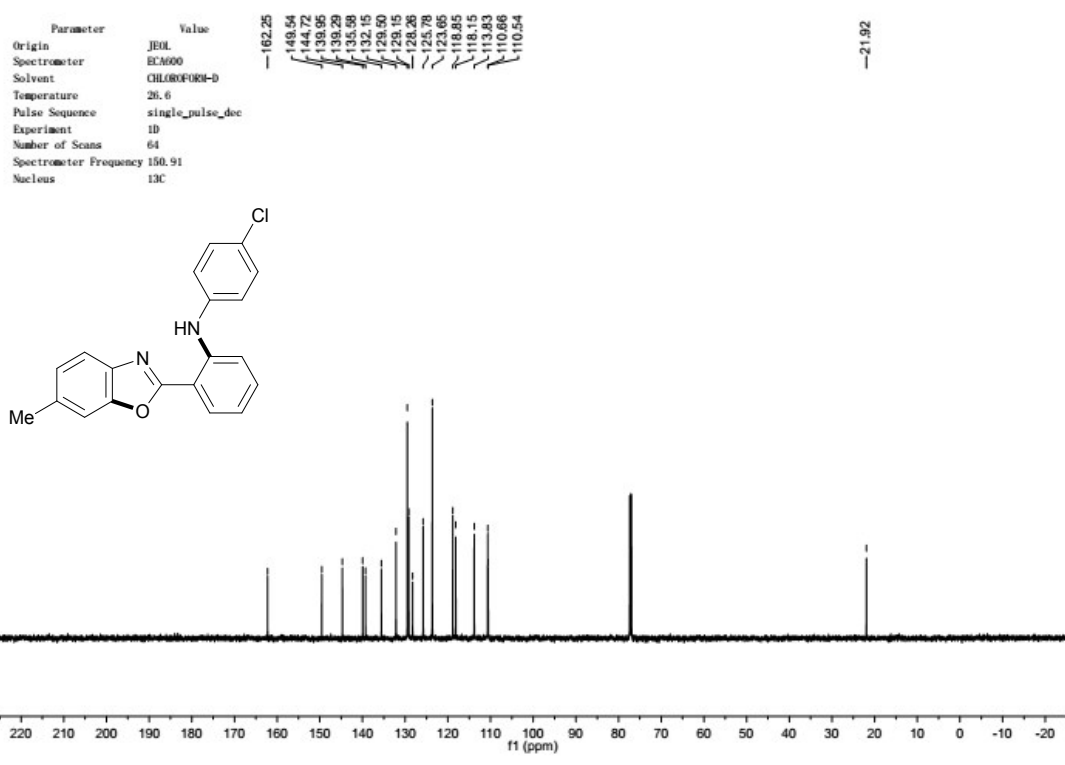





Parameter Value  
 Origin JEOL  
 Spectrometer ECA300  
 Solvent CHLOROFORM-D  
 Temperature 412.5  
 Pulse Sequence single\_pulse.ex2  
 Experiment 1D  
 Number of Scans 16  
 Spectrometer Frequency 300.53  
 Nucleus 1H

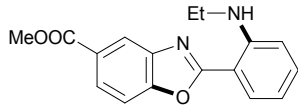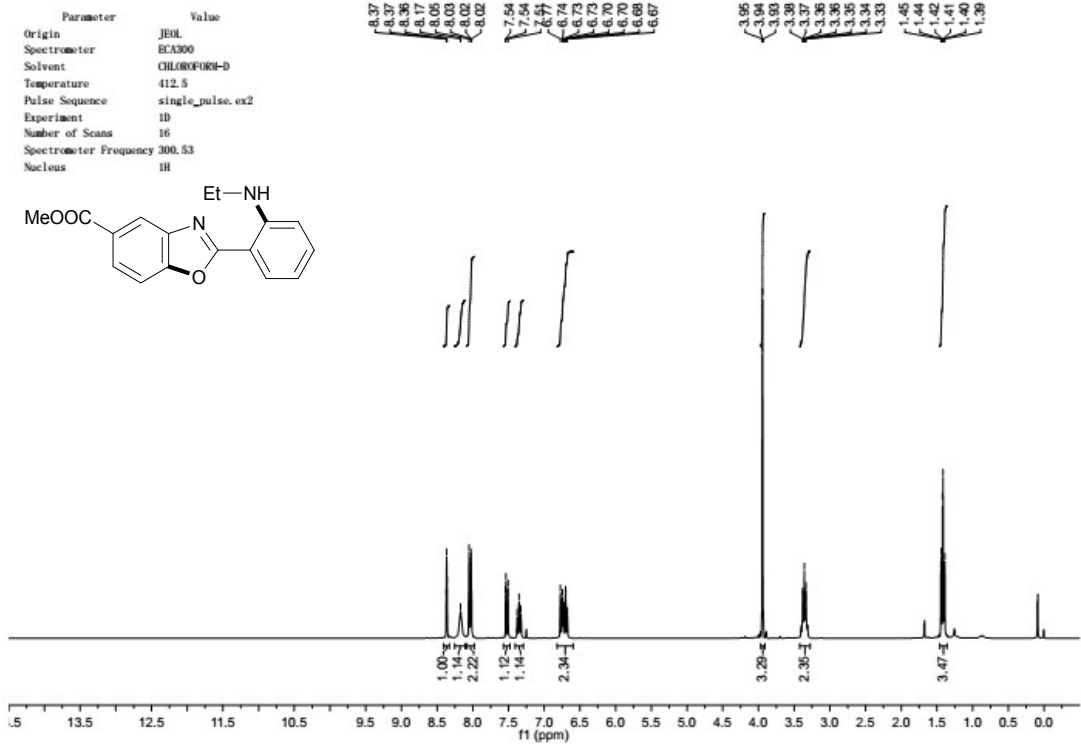

Parameter Value  
 Origin JEOL  
 Spectrometer ECA600  
 Solvent CHLOROFORM-D  
 Temperature 26.5  
 Pulse Sequence single\_pulse\_dec  
 Experiment 1D  
 Number of Scans 40  
 Spectrometer Frequency 150.91  
 Nucleus 13C

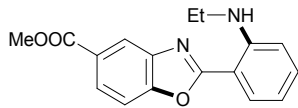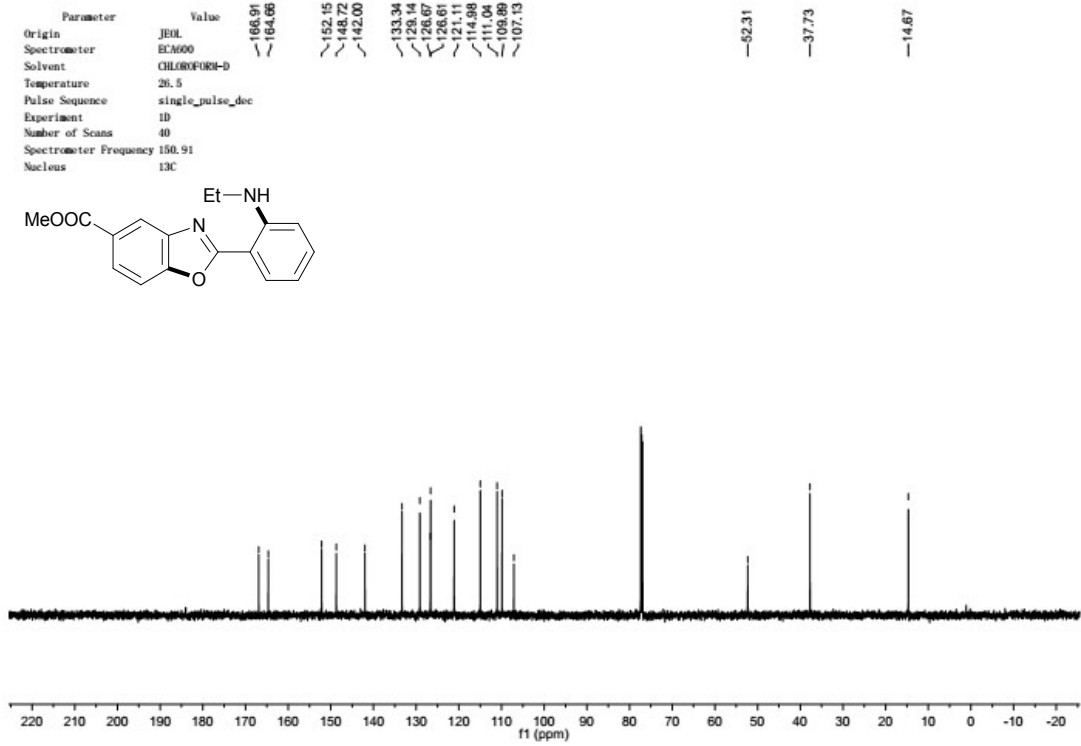

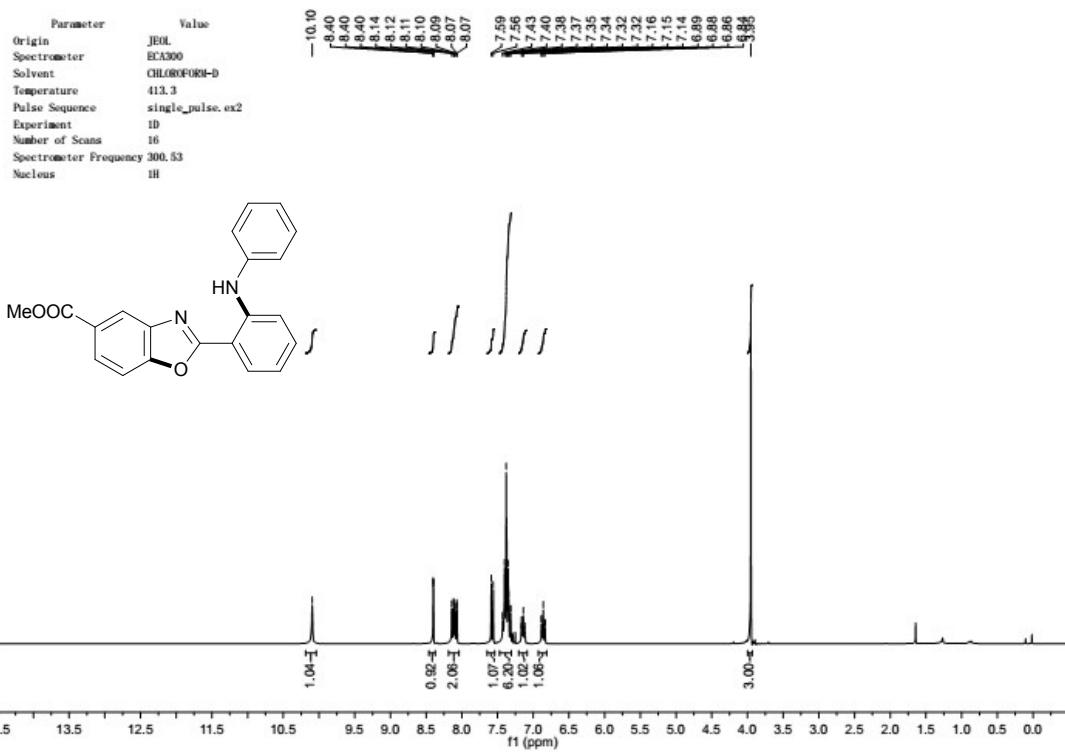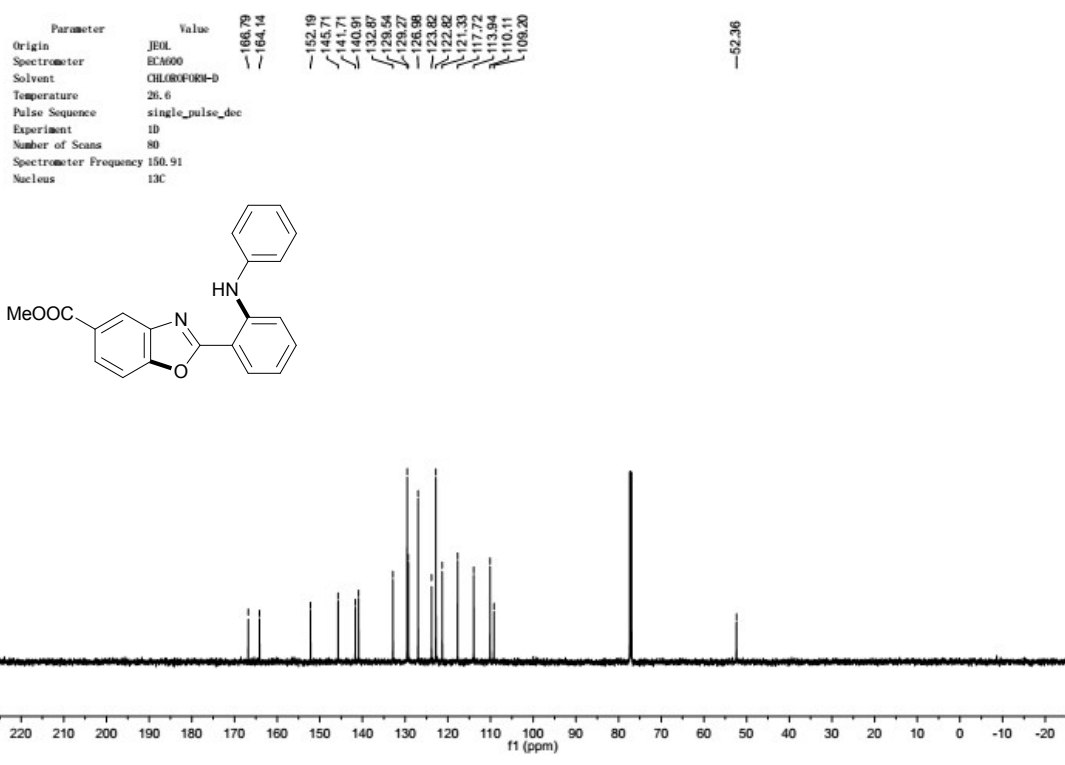

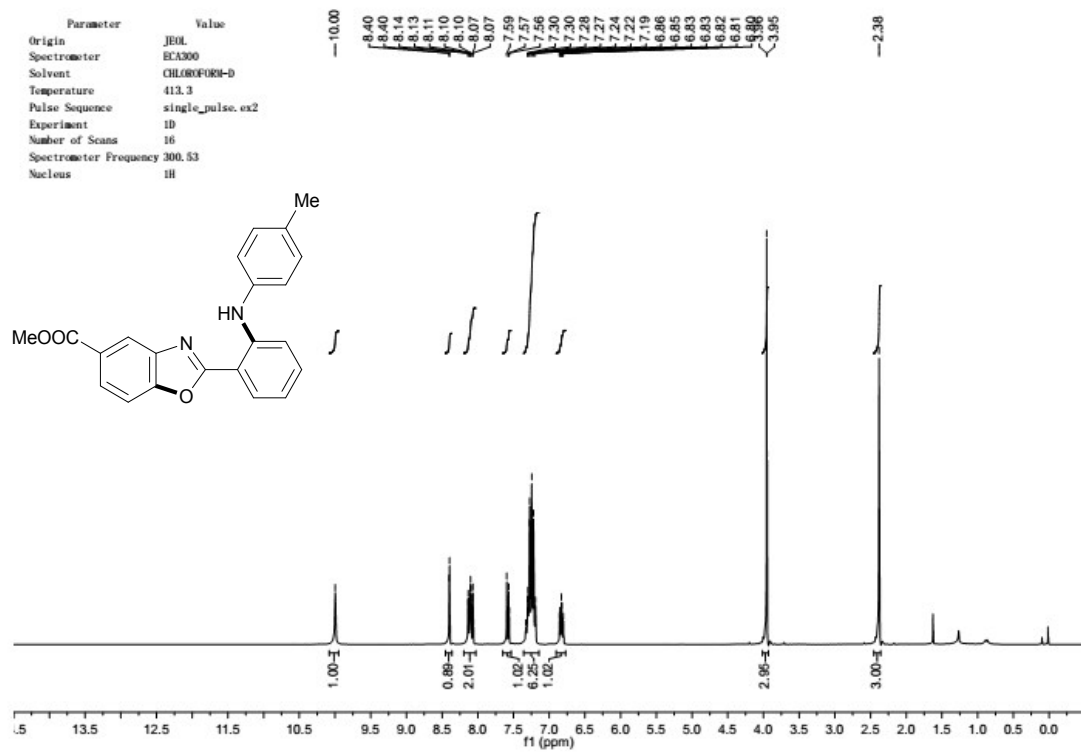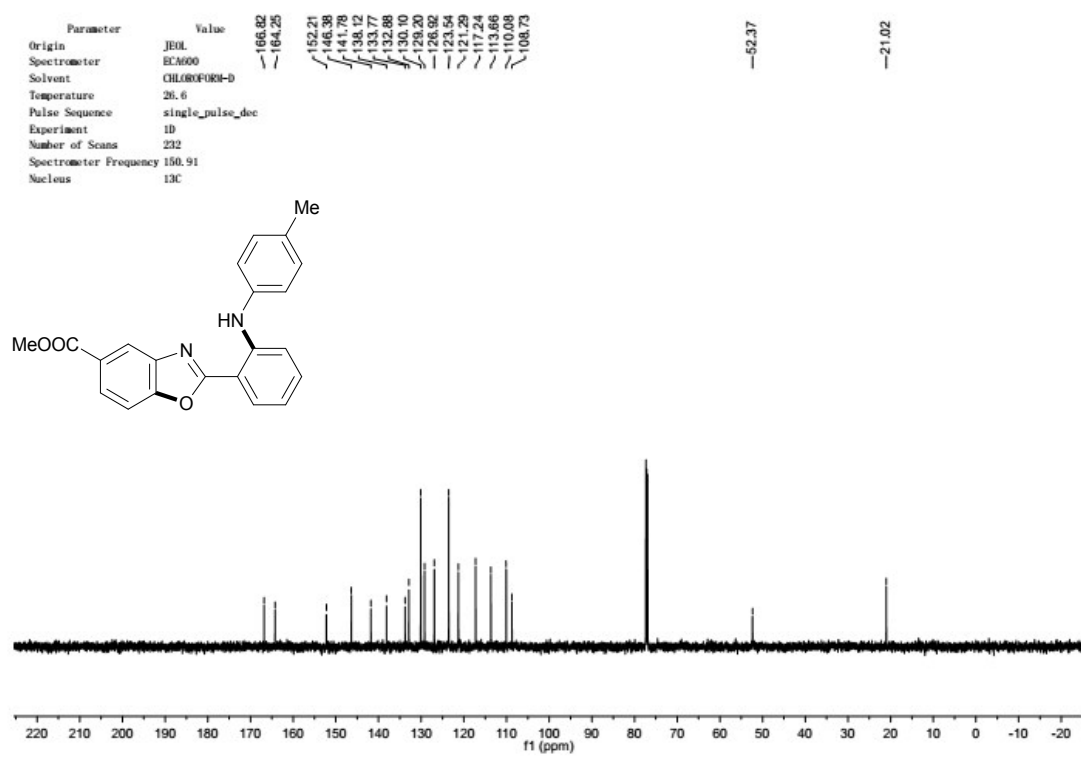

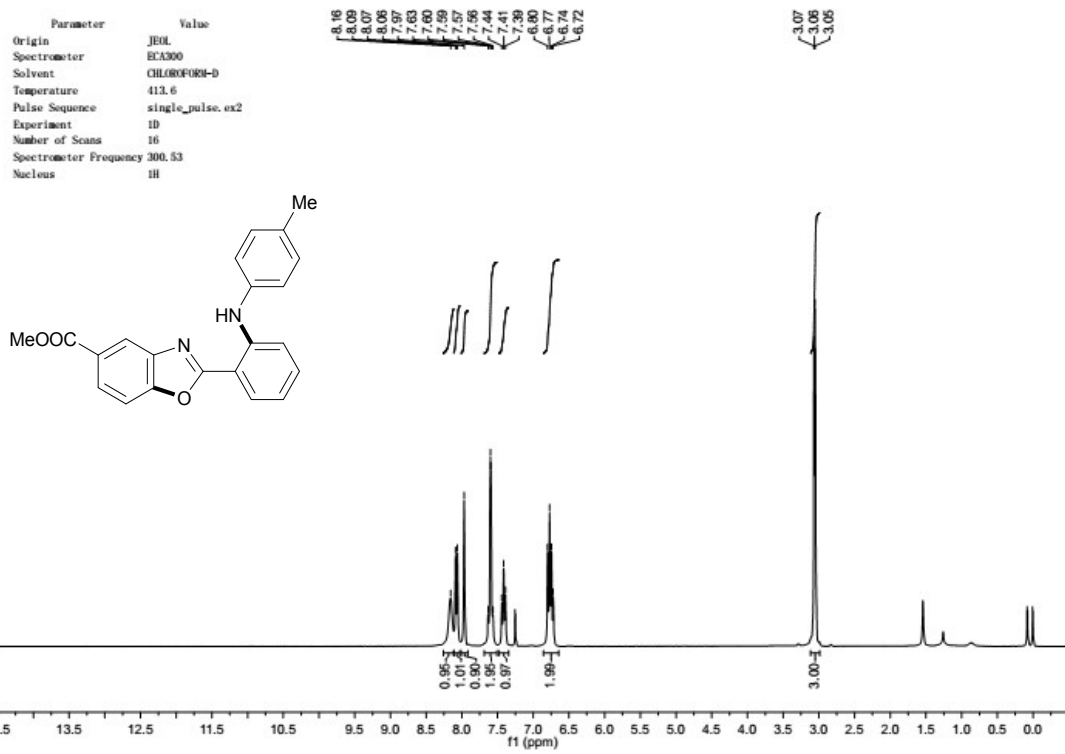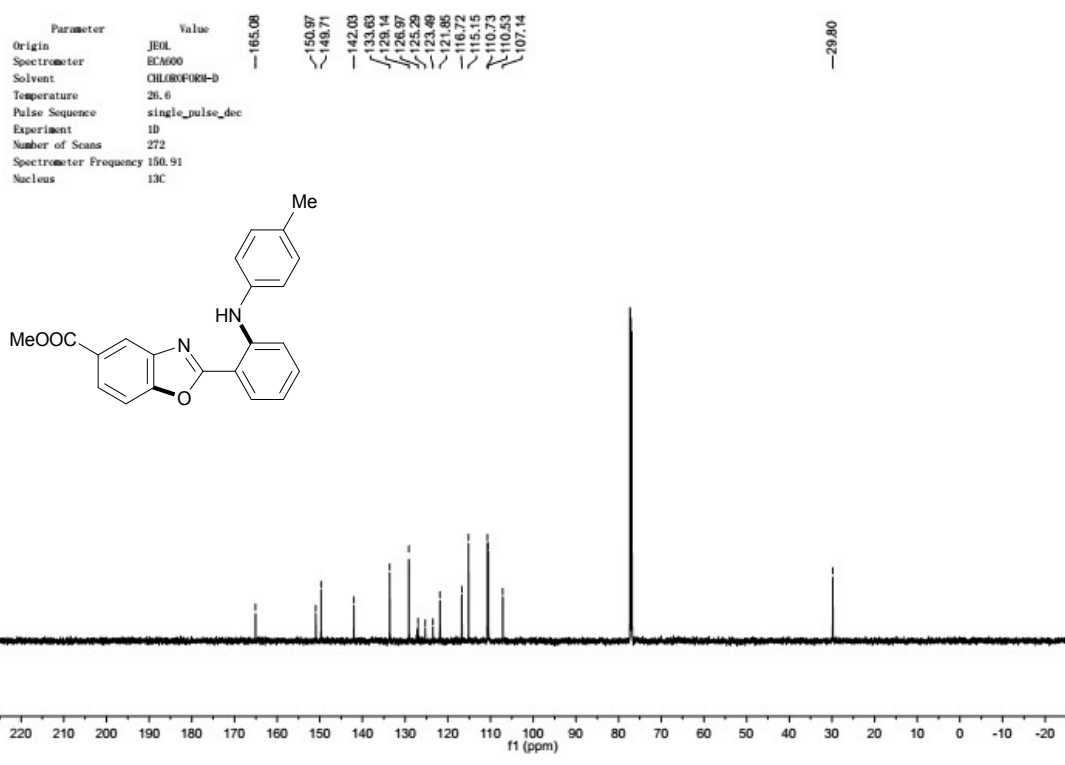

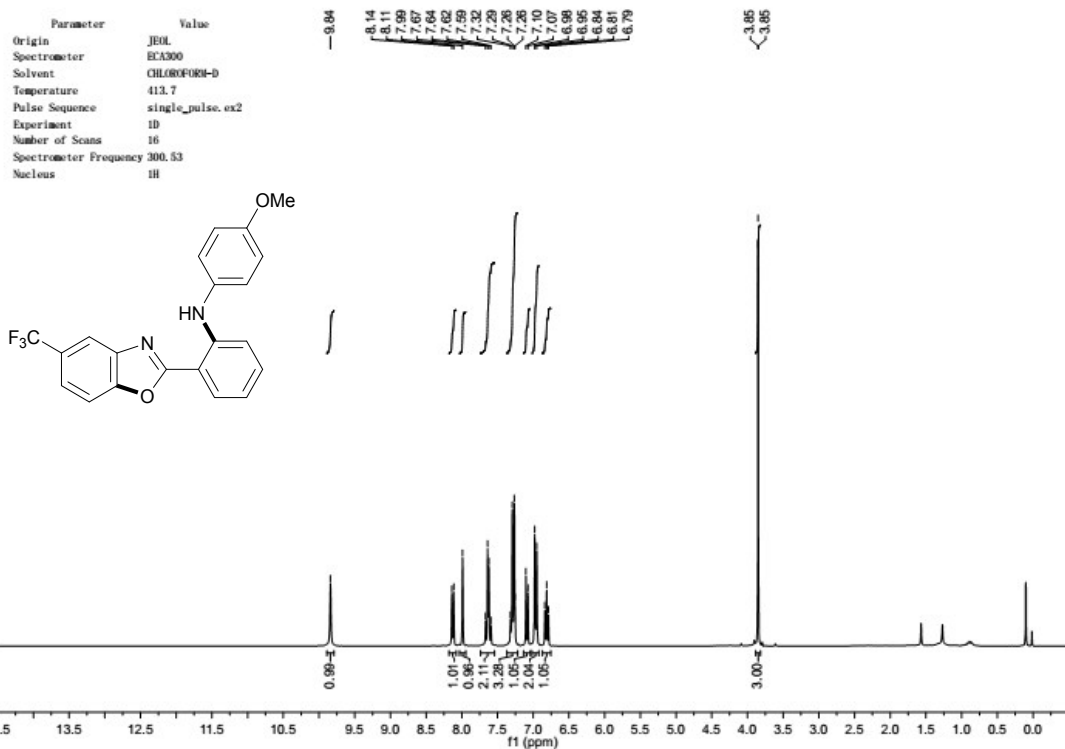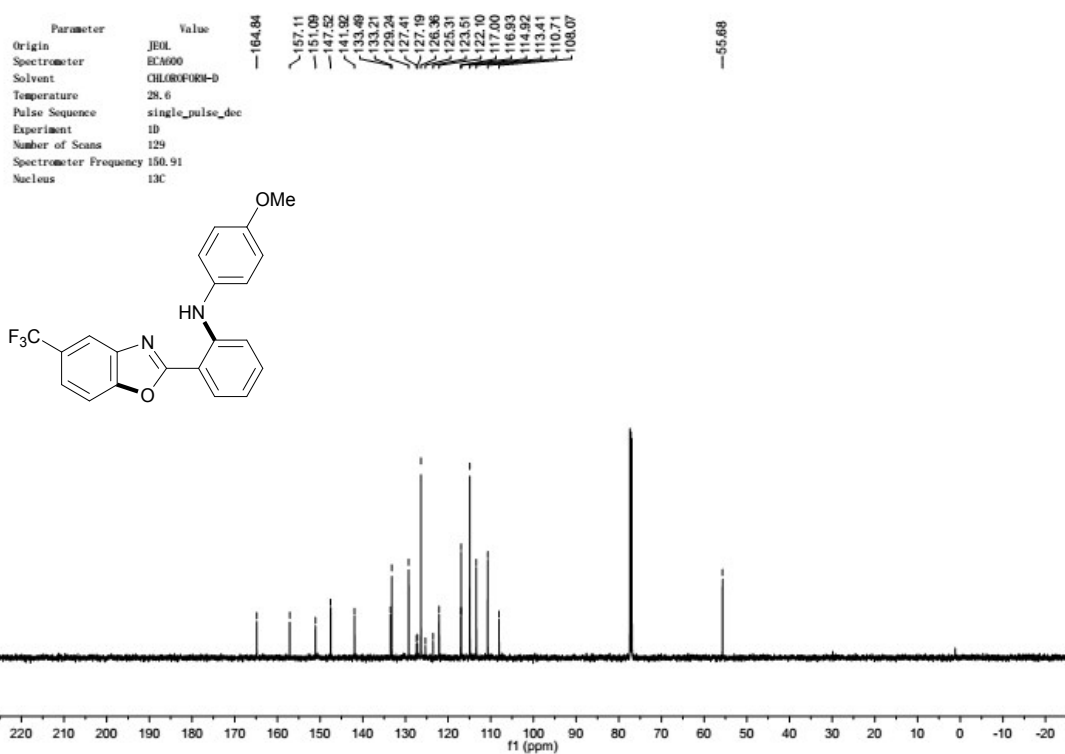

Parameter Value  
 Origin JEOL  
 Spectrometer ECA300  
 Solvent CHLOROFORM-D  
 Temperature 413.6  
 Pulse Sequence single\_pulse.ex2  
 Experiment 1D  
 Number of Scans 16  
 Spectrometer Frequency 300.53  
 Nucleus 1H

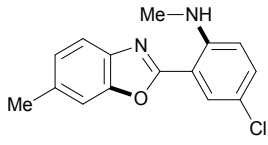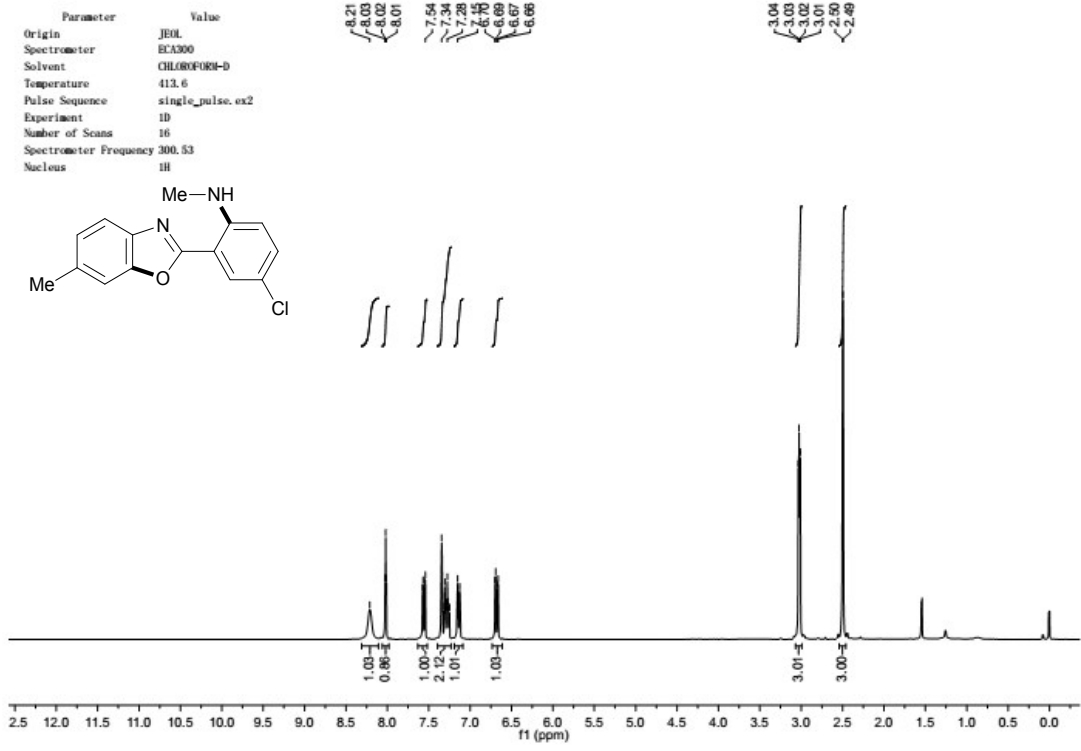

Parameter Value  
 Origin JEOL  
 Spectrometer ECA600  
 Solvent CHLOROFORM-D  
 Temperature 26.6  
 Pulse Sequence single\_pulse\_dec  
 Experiment 1D  
 Number of Scans 136  
 Spectrometer Frequency 150.91  
 Nucleus 13C

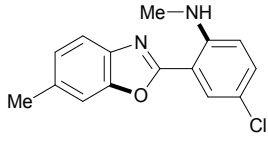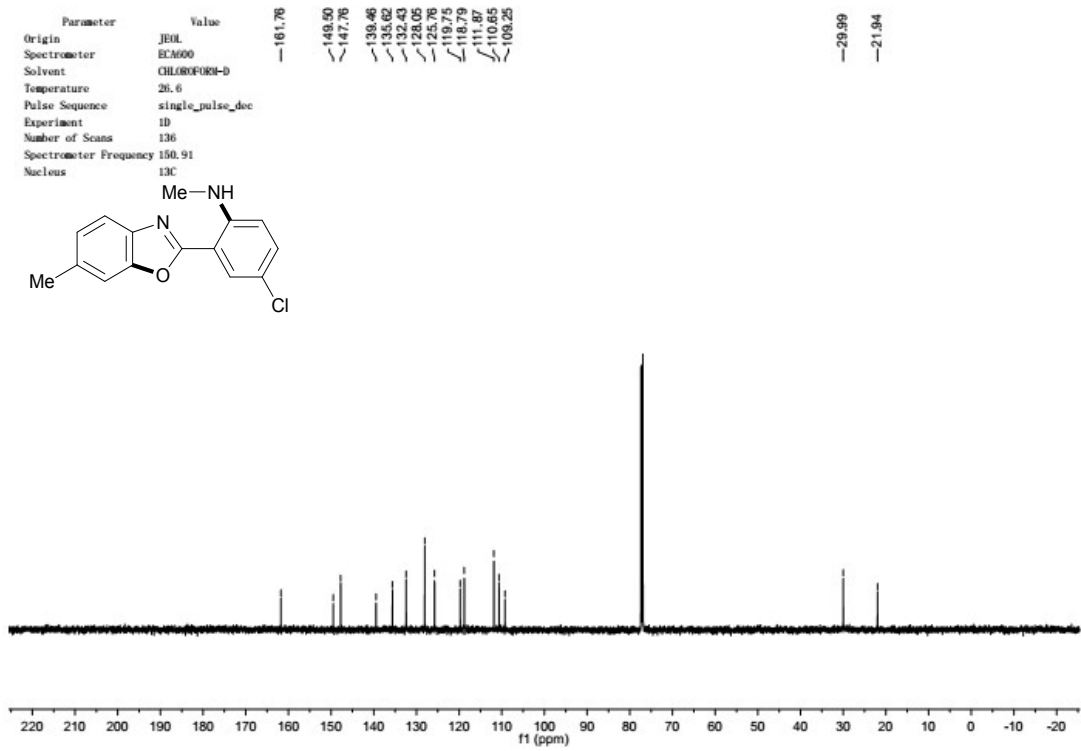

Parameter Value  
 Origin JEOL  
 Spectrometer ECA300  
 Solvent CHLOROFORM-D  
 Temperature 25.2  
 Pulse Sequence single\_pulse\_ex2  
 Experiment 1D  
 Number of Scans 16  
 Spectrometer Frequency 300.53  
 Nucleus 1H

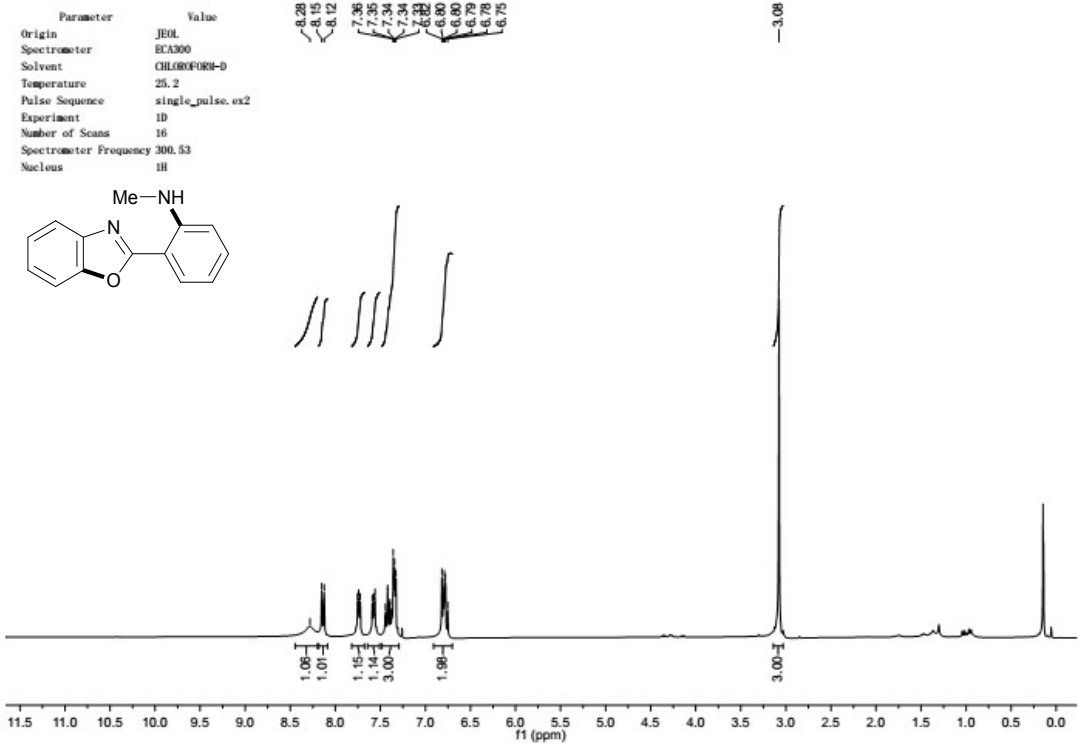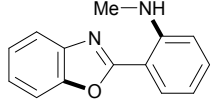

Parameter Value  
 Origin JEOL  
 Spectrometer ECA600  
 Solvent CHLOROFORM-D  
 Temperature 26.4  
 Pulse Sequence single\_pulse\_dec  
 Experiment 1D  
 Number of Scans 172  
 Spectrometer Frequency 150.91  
 Nucleus 13C

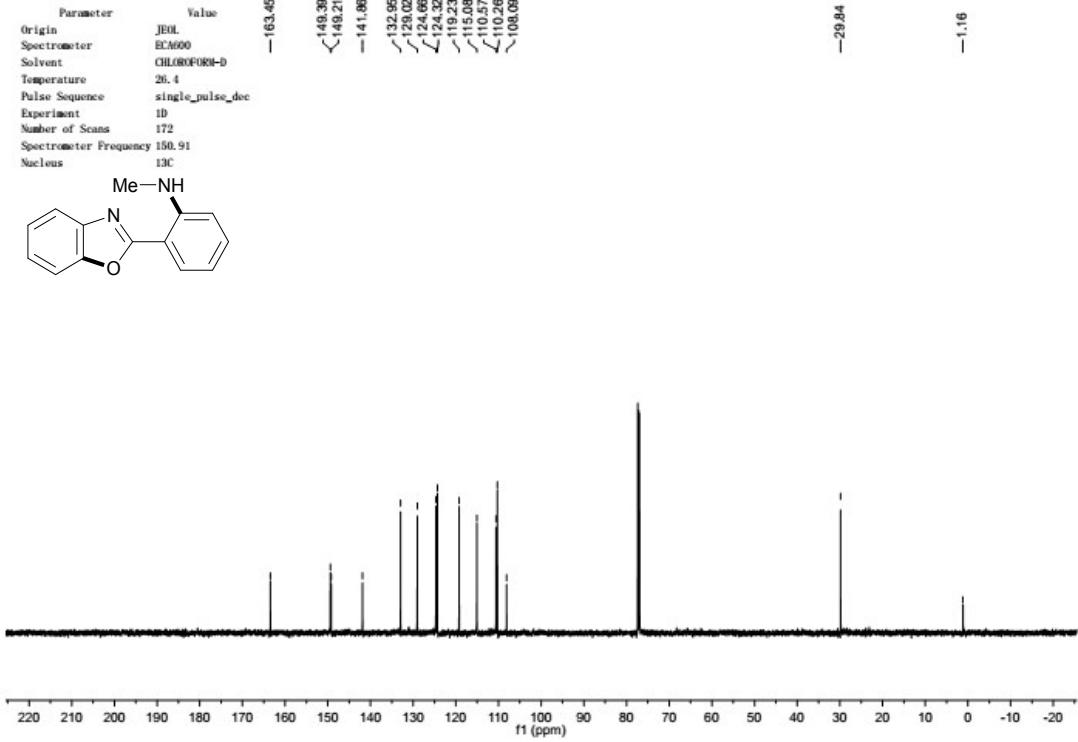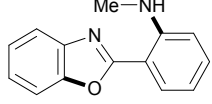

Supplement: c9ra01908a1.pdf [file c9ra01908a1.pdf]
